# Supplementary material for: Identification of Hub Genes Involved in Early-onset Schizophrenia: From Genetic Susceptibility to Predicted Regulated Gene Expression
Source: Research Square preprint supplement (doi:10.21203/rs.3.rs-5833160/v1), 2025-01-20
Supplement: Supplementary file 1 [file 4c735618d8db2abcad97c3dd.xlsx]

## Sheet: index
Identification of Hub Genes Involved in Early-onset Schizophrenia: From Genetic Susceptibility to Predicted Regulated Gene Expression
Supplementary Data 1. Association of predicted expression in DLPFC with SZ in the PGC wave3 schizophrenia dataset. Genome-wide significant results are shown in red.
Supplementary Data 2. Summary of IPA® findings for functional annotations of 56 M10-GeRS genes within Module 10.
Supplementary Data 3. Relationships among genes within the top gene network of module 10, as identified by IPA.
Supplementary Data 4. Summary of IPA® findings for functional annotations of 119 M9-GeRS genes within Module 9 from WGCNA based on gene expression of frontal cortex and temporal cortex brain tissue
Supplementary Data 5. Relationships among genes within the top gene network of module 9 from WGCNA based on gene expression of frontal cortex and temporal cortex brain tissue, as identified by IPA.

## Sheet: Supplementary Data 1
Supplementary Data 1. Association of predicted expression in DLPFC with SZ in the PGC wave3 schizophrenia dataset. Genome-wide significant results are shown in red.
gene	gene_name	zscore	effect_size	pvalue	Prediction performance R2	Prediction performance pvalue	N snps used	N snps in model
ENSG00000158373	H2BC5	9.83837	221.55	7.695e-23	0.019521	0.00250425	1	1
ENSG00000140564	FURIN	-9.1662	-5.02256	4.89995e-20	0.12893	1.25753e-15	10	13
ENSG00000198315	ZKSCAN8	-8.53796	-7.91906	1.36611e-17	0.087448	7.38081e-11	22	27
ENSG00000148842	CNNM2	-8.42599	-12.987	3.57727e-17	0.0459038	3.05721e-06	17	20
ENSG00000259946	ENSG00000259946	8.35427	12.4705	6.58361e-17	0.0246157	0.000676695	12	14
ENSG00000219392	ZNF602P	8.18884	3.88493	2.63748e-16	0.208973	1.92901e-25	33	39
ENSG00000114904	NEK4	8.07316	4.6803	6.84994e-16	0.0906265	3.2295e-11	19	26
ENSG00000204592	HLA-E	-7.84473	-95.4203	4.33874e-15	0.0421958	7.81551e-06	2	3
ENSG00000169592	INO80E	7.71637	5.65959	1.19692e-14	0.100958	2.16497e-12	34	44
ENSG00000016864	GLT8D1	-7.46259	-5.76488	8.48402e-14	0.0731418	2.96722e-09	12	13
ENSG00000235109	ZSCAN31	-7.42768	-4.29439	1.10517e-13	0.378661	6.76068e-50	21	25
ENSG00000088808	PPP1R13B	7.34559	17.1897	2.04859e-13	0.0253223	0.000564946	9	10
ENSG00000197279	ZNF165	7.3374	7.42722	2.1778e-13	0.102721	1.36159e-12	5	6
ENSG00000110492	MDK	7.1919	19.8847	6.38961e-13	0.00872484	0.043866	7	8
ENSG00000187987	ZSCAN23	-7.14019	-2.83087	9.32e-13	0.403227	5.65041e-54	19	19
ENSG00000243696	ENSG00000243696	-6.91378	-6.86571	4.71905e-12	0.0983762	4.26317e-12	13	14
ENSG00000182952	HMGN4	-6.8109	-179.139	9.69899e-12	0.00917161	0.0387759	1	2
ENSG00000115524	SF3B1	6.80483	10.1619	1.0117e-11	0.061642	5.62122e-08	12	18
ENSG00000111801	BTN3A3	-6.57978	-4.93524	4.71153e-11	0.148588	5.88383e-18	24	30
ENSG00000259404	EFL1P1	-6.50086	-11.0732	7.98595e-11	0.0953782	9.34646e-12	4	5
ENSG00000103495	MAZ	-6.42508	-171.206	1.318e-10	0.0309111	0.000136239	1	1
ENSG00000121653	MAPK8IP1	-6.41213	-153.402	1.435e-10	0.0195128	0.00250955	1	1
ENSG00000163673	DCLK3	6.404	14.1231	1.51356e-10	0.0161533	0.00600705	21	24
ENSG00000158406	H4C8	6.40212	3.72914	1.5323e-10	0.161328	1.7112e-19	4	5
ENSG00000111325	OGFOD2	-6.40104	-5.94966	1.54324e-10	0.0301059	0.000167148	30	33
ENSG00000076242	MLH1	-6.37686	-154.975	1.80759e-10	0.0212771	0.00159249	2	2
ENSG00000197933	ZNF823	-6.35025	-5.21707	2.14962e-10	0.0964134	7.12916e-12	2	3
ENSG00000102882	MAPK3	-6.34124	-3.83293	2.27923e-10	0.121675	8.85977e-15	5	8
ENSG00000172817	CYP7B1	6.29353	4.60805	3.1032e-10	0.0918836	2.32748e-11	5	6
ENSG00000159479	MED8	-6.26702	-7.83714	3.68024e-10	0.0582472	1.33422e-07	57	60
ENSG00000149932	TMEM219	6.1883	6.18761	6.08164e-10	0.0298303	0.000179265	25	40
ENSG00000196812	ZSCAN16	6.16789	9.18869	6.92053e-10	0.0342451	5.84938e-05	7	7
ENSG00000005483	KMT2E	-6.10621	-175.455	1.02027e-09	0.0251728	0.000586932	2	2
ENSG00000216901	ZNF603P	-6.07886	-1.66411	1.21044e-09	0.612784	1.2004e-97	16	17
ENSG00000147548	NSD3	5.98066	14.0601	2.22236e-09	0.0227287	0.00109693	10	11
ENSG00000159640	ACE	5.84729	9.39178	4.9965e-09	0.035365	4.40448e-05	5	5
ENSG00000156398	SFXN2	5.80367	149.471	6.488e-09	0.0184108	0.0033378	1	1
ENSG00000177096	PHETA2	-5.70257	-9.31071	1.18017e-08	0.0368833	2.99857e-05	3	3
ENSG00000003509	NDUFAF7	-5.64883	-13.4704	1.61543e-08	0.0125843	0.0154026	9	11
ENSG00000085788	DDHD2	-5.64817	-7.94673	1.62167e-08	0.0588822	1.13518e-07	5	5
ENSG00000149923	PPP4C	5.63506	159.671	1.75e-08	0.0394896	1.55026e-05	1	1
ENSG00000140265	ZSCAN29	-5.62878	-2.43991	1.81485e-08	0.269524	1.61145e-33	30	35
ENSG00000167491	GATAD2A	5.5619	2.12992	2.66849e-08	0.2721	7.06795e-34	21	23
ENSG00000060656	PTPRU	-5.54914	-2.88063	2.87076e-08	0.0939654	1.35204e-11	25	27
ENSG00000230002	ALMS1-IT1	-5.52313	-16.6854	3.33009e-08	0.0172784	0.00447927	28	37
ENSG00000162753	SLC9C2	-5.47793	-1.98896	4.30329e-08	0.401192	1.24767e-53	57	67
ENSG00000117016	RIMS3	5.41524	23.5861	6.12058e-08	0.0105203	0.0268255	14	16
ENSG00000186470	BTN3A2	5.3848	-0.403881	7.25234e-08	0.313409	8.5558e-40	62	68
ENSG00000120071	KANSL1	-5.37342	-16.4113	7.7257e-08	0.627717	1.29307e-101	7	9
ENSG00000251141	MRPS30-DT	-5.35264	-5.33767	8.66816e-08	0.039288	1.63141e-05	17	23
ENSG00000205981	DNAJC19	-5.34426	-157.708	9.07876e-08	0.00889226	0.0418812	2	2
ENSG00000143374	TARS2	5.34285	139.314	9.14949e-08	0.0242513	0.000742775	2	2
ENSG00000257040	NA	5.33714	136.401	9.44225e-08	0.0129328	0.0140371	2	2
ENSG00000197653	DNAH10	-5.31769	-10.3692	1.05093e-07	0.0225785	0.00114001	14	16
ENSG00000163016	ALMS1P1	-5.28299	-2.65563	1.27089e-07	0.257766	6.69337e-32	13	17
ENSG00000161896	IP6K3	5.23625	13.0918	1.63876e-07	0.0202582	0.00207031	6	6
ENSG00000172922	RNASEH2C	5.20353	6.46746	1.95535e-07	0.0490961	1.36187e-06	6	10
ENSG00000115896	PLCL1	5.19768	27.4782	2.01789e-07	0.0118707	0.0186399	8	9
ENSG00000112659	CUL9	5.19072	4.16355	2.09478e-07	0.103061	1.24504e-12	36	40
ENSG00000250091	DNAH10OS	-5.17564	-4.20161	2.27127e-07	0.14981	4.20053e-18	10	11
ENSG00000096654	ZNF184	-5.17551	-9.47701	2.27287e-07	0.0163865	0.00565193	10	11
ENSG00000173715	C11orf80	5.16996	4.77845	2.34139e-07	0.142497	3.13905e-17	21	31
ENSG00000117592	PRDX6	-5.1341	-168.907	2.835e-07	0.00843125	0.0475886	1	1
ENSG00000146007	ZMAT2	-5.10967	-11.0978	3.22725e-07	0.044839	4.00314e-06	8	12
ENSG00000176371	ZSCAN2	-5.04518	-10.9156	4.531e-07	0.0304224	0.000154235	1	1
ENSG00000141084	RANBP10	4.99749	14.9229	5.80812e-07	0.0124958	0.0157702	16	26
ENSG00000112667	DNPH1	4.99524	8.98043	5.87616e-07	0.0291783	0.000211573	12	17
ENSG00000100417	PMM1	-4.97058	-15.6601	6.67531e-07	0.014214	0.00999669	2	3
ENSG00000107872	FBXL15	-4.95993	-188.375	7.052e-07	0.0100589	0.0304106	1	1
ENSG00000163728	TTC14	-4.93294	-3.51265	8.10003e-07	0.215244	2.99944e-26	5	5
ENSG00000122778	KIAA1549	-4.90662	-12.979	9.26599e-07	0.0314357	0.000119254	7	8
ENSG00000262246	CORO7	-4.902	-5.95694	9.48641e-07	0.0834871	2.0611e-10	20	25
ENSG00000176956	LY6H	-4.88917	-7.28666	1.0126e-06	0.0493718	1.26997e-06	5	6
ENSG00000136144	RCBTB1	-4.82933	-4.22756	1.36991e-06	0.105493	6.55608e-13	15	18
ENSG00000226314	ZKSCAN8P1	-4.80531	-2.5624	1.54508e-06	0.269456	1.64711e-33	12	16
ENSG00000197062	ZSCAN26	-4.79055	-5.98556	1.66325e-06	0.078037	8.42236e-10	10	12
ENSG00000167526	RPL13	4.70629	8.83474	2.52264e-06	0.0476187	1.98017e-06	24	29
ENSG00000150967	ABCB9	4.67808	185.092	2.89575e-06	0.0225585	0.00114588	2	2
ENSG00000233822	H2BC15	4.66608	-150.565	3.07003e-06	0.0327544	8.53496e-05	3	3
ENSG00000108960	MMD	4.65182	5.30725	3.29013e-06	0.0864868	9.47273e-11	15	20
ENSG00000117593	DARS2	4.64058	3.72568	3.47437e-06	0.153447	1.53534e-18	16	20
ENSG00000102879	CORO1A	-4.57858	-9.75506	4.68133e-06	0.0238821	0.000816344	14	18
ENSG00000186868	MAPT	4.57132	10.2214	4.84659e-06	0.10475	7.97735e-13	8	9
ENSG00000175216	CKAP5	-4.54644	-515.736	5.456e-06	0.00958641	0.0346014	1	2
ENSG00000050130	JKAMP	-4.54445	-6.93678	5.50782e-06	0.0379196	2.30664e-05	23	26
ENSG00000166167	BTRC	-4.54111	-15.0825	5.59599e-06	0.0226908	0.00110767	18	19
ENSG00000204789	ZNF204P	4.53857	5.28965	5.66377e-06	0.125822	2.90738e-15	12	12
ENSG00000196437	ZNF569	-4.53012	-180.821	5.895e-06	0.0218299	0.00138157	1	2
ENSG00000105186	ANKRD27	-4.52609	-2.49625	6.00858e-06	0.327592	6.60212e-42	7	7
ENSG00000258429	PDF	4.52419	5.47499	6.06259e-06	0.0661515	1.77837e-08	15	15
ENSG00000251664	PCDHA12	4.51739	7.89676	6.26056e-06	0.0795937	5.63754e-10	4	7
ENSG00000152078	TLCD4	4.49495	14.5333	6.9586e-06	0.0129288	0.0140522	19	21
ENSG00000173930	SLCO4C1	-4.4897	-12.1293	7.13245e-06	0.256251	1.07747e-31	11	14
ENSG00000189298	ZKSCAN3	4.48874	10.0342	7.16472e-06	0.126992	2.12154e-15	14	19
ENSG00000186001	LRCH3	-4.47864	-155.871	7.51201e-06	0.0153532	0.00740742	1	1
ENSG00000030110	BAK1	4.46794	7.46959	7.89757e-06	0.0538507	4.07783e-07	7	9
ENSG00000163468	CCT3	-4.4577	-44.0649	8.2842e-06	0.0117562	0.0192212	5	6
ENSG00000162298	SYVN1	4.44283	16.1762	8.87836e-06	0.0155052	0.00711794	15	17
ENSG00000145335	SNCA	-4.44238	-7.49058	8.89675e-06	0.0552056	2.89073e-07	27	35
ENSG00000168014	C2CD3	-4.43974	-179.89	9.00677e-06	0.0296327	0.000188497	2	2
ENSG00000197958	RPL12	-4.43903	-3.89812	9.03646e-06	0.280548	4.63937e-35	33	45
ENSG00000157851	DPYSL5	4.4379	3.15956	9.08411e-06	0.246193	2.47953e-30	14	17
ENSG00000166260	COX11	4.4332	4.6278	9.28432e-06	0.202998	1.12132e-24	28	34
ENSG00000218739	CEBPZOS	-4.43017	-5.9075	9.41605e-06	0.0746714	2.00293e-09	24	26
ENSG00000215513	NA	4.42921	171.541	9.45801e-06	0.0484222	1.61549e-06	1	1
ENSG00000132388	UBE2G1	4.41088	10.1035	1.02952e-05	0.0727453	3.28517e-09	17	20
ENSG00000204536	CCHCR1	4.40039	12.2111	1.08054e-05	0.184805	2.20687e-22	7	8
ENSG00000183166	CALN1	4.37644	13.9346	1.20631e-05	0.0283579	0.000260651	17	18
ENSG00000122687	MRM2	-4.37028	-4.1269	1.24085e-05	0.0529501	5.12508e-07	27	39
ENSG00000072778	ACADVL	4.36672	5.76784	1.26125e-05	0.0810495	3.87129e-10	17	23
ENSG00000153406	NMRAL1	4.34718	6.53076	1.379e-05	0.10873	2.78696e-13	21	23
ENSG00000175662	TOM1L2	-4.32546	-2.65911	1.52215e-05	0.265513	5.78259e-33	18	20
ENSG00000064205	CCN5	4.32509	155.206	1.52473e-05	0.0102743	0.0286793	2	3
ENSG00000126067	PSMB2	4.31987	354.781	1.56122e-05	0.029437	0.00019811	3	5
ENSG00000178922	HYI	4.31626	5.90656	1.58694e-05	0.121179	1.01181e-14	29	32
ENSG00000221823	PPP3R1	4.31415	148.718	1.60221e-05	0.010466	0.0272236	2	2
ENSG00000204856	FAM216A	4.30152	10.3276	1.69634e-05	0.0242031	0.000751992	10	10
ENSG00000101546	RBFA	4.28686	10.8385	1.8122e-05	0.0236615	0.000863747	2	2
ENSG00000116127	ALMS1	-4.28021	-3.93734	1.86718e-05	0.148487	6.0512e-18	33	55
ENSG00000162738	VANGL2	4.2715	22.5444	1.94163e-05	0.0254798	0.000542679	41	41
ENSG00000198951	NAGA	-4.25821	-2.38855	2.06073e-05	0.151487	2.64219e-18	30	32
ENSG00000120903	CHRNA2	-4.25612	-5.55263	2.08001e-05	0.0324494	9.22136e-05	11	12
ENSG00000261342	ENSG00000261342	-4.24224	-28.4379	2.21302e-05	0.00927321	0.037707	5	8
ENSG00000132612	VPS4A	-4.24151	-9.86768	2.22025e-05	0.0272939	0.000341721	5	5
ENSG00000103423	DNAJA3	4.2377	2.67288	2.2582e-05	0.23802	3.07657e-29	25	28
ENSG00000163939	PBRM1	-4.22598	-165.708	2.379e-05	0.0169395	0.00489254	1	1
ENSG00000179859	RNF227	-4.22502	-10.6052	2.38919e-05	0.0356282	4.12044e-05	4	4
ENSG00000158604	TMED4	4.21678	7.43692	2.47814e-05	0.0422904	7.63069e-06	3	3
ENSG00000203644	ENSG00000203644	-4.21139	-18.3594	2.53802e-05	0.0123601	0.0163522	24	33
ENSG00000187741	FANCA	-4.19788	-4.17745	2.69431e-05	0.0982945	4.35547e-12	12	14
ENSG00000213672	NCKIPSD	-4.19599	-2.87595	2.7168e-05	0.25609	1.13329e-31	7	7
ENSG00000101365	IDH3B	4.17618	10.8018	2.96448e-05	0.0596898	9.24252e-08	23	29
ENSG00000146109	ABT1	-4.17146	-18.2811	3.02655e-05	0.0404303	1.22181e-05	16	23
ENSG00000166762	CATSPER2	-4.16848	-16.0569	3.06633e-05	0.0159373	0.00635613	8	10
ENSG00000213380	COG8	-4.16813	-9.03293	3.07103e-05	0.0238464	0.00082384	6	6
ENSG00000101104	PABPC1L	4.15618	1.85393	3.23609e-05	0.200983	2.02386e-24	43	52
ENSG00000172803	SNX32	-4.13452	-1.57631	3.55692e-05	0.474385	8.40105e-67	32	38
ENSG00000142197	DOP1B	-4.13261	-7.80341	3.58663e-05	0.0735714	2.65723e-09	9	9
ENSG00000124613	ZNF391	-4.12831	-6.84001	3.65439e-05	0.0399164	1.39152e-05	12	19
ENSG00000131979	GCH1	4.126	18.3966	3.69123e-05	0.0465372	2.60415e-06	5	11
ENSG00000089486	CDIP1	4.12505	7.62299	3.70657e-05	0.0199559	0.00223824	18	26
ENSG00000187772	LIN28B	4.12243	8.54793	3.749e-05	0.0411712	1.01293e-05	3	4
ENSG00000113594	LIFR	-4.11425	-10.4015	3.88444e-05	0.0620893	5.01552e-08	11	13
ENSG00000166272	WBP1L	4.10442	1.47996	4.05327e-05	0.203796	8.86956e-25	13	16
ENSG00000204859	ZBTB48	4.10275	87.2088	4.08274e-05	0.017523	0.00420311	2	2
ENSG00000055147	FAM114A2	-4.0968	-1.82656	4.18907e-05	0.387491	2.41473e-51	48	49
ENSG00000182858	ALG12	-4.09154	-12.7008	4.28516e-05	0.0367269	3.11973e-05	3	4
ENSG00000168000	BSCL2	4.08134	394.54	4.47768e-05	0.0208577	0.00177402	2	4
ENSG00000165409	TSHR	-4.07498	-5.14366	4.60189e-05	0.0976043	5.21901e-12	6	6
ENSG00000258704	SRP54-AS1	-4.07477	-165.91	4.606e-05	0.0367511	3.10061e-05	1	1
ENSG00000188603	CLN3	4.06682	187.321	4.766e-05	0.0160655	0.00614658	1	1
ENSG00000154079	SDHAF4	4.05787	2.65648	4.95214e-05	0.407479	1.06998e-54	14	16
ENSG00000115266	APC2	-4.05268	-9.41616	5.06344e-05	0.0327308	8.58635e-05	5	5
ENSG00000140022	STON2	4.04948	9.2276	5.13327e-05	0.0282899	0.0002652	15	16
ENSG00000015676	NUDCD3	-4.0475	-13.4591	5.17667e-05	0.0168578	0.00499779	5	6
ENSG00000104412	EMC2	-4.04494	-11.2055	5.23355e-05	0.0471074	2.25398e-06	31	34
ENSG00000129696	TTI2	4.04405	173.033	5.25351e-05	0.00949962	0.0354343	2	2
ENSG00000066322	ELOVL1	4.04306	17.1522	5.27583e-05	0.0259787	0.000477808	18	21
ENSG00000165119	HNRNPK	4.02742	13.9852	5.63916e-05	0.0139112	0.0108292	6	6
ENSG00000006744	ELAC2	-4.02728	-1.92413	5.64252e-05	0.314614	5.68317e-40	41	48
ENSG00000124380	SNRNP27	4.02549	7.39382	5.68579e-05	0.0508264	8.78318e-07	5	5
ENSG00000214435	AS3MT	4.02503	2.11619	5.69681e-05	0.330557	2.35805e-42	20	24
ENSG00000101447	FAM83D	4.02155	7.32637	5.78152e-05	0.051173	8.04422e-07	15	16
ENSG00000111328	CDK2AP1	4.02009	3.03545	5.81769e-05	0.0266529	0.000402349	29	37
ENSG00000198646	NCOA6	4.0152	20.5821	5.93947e-05	0.0296281	0.000188716	5	9
ENSG00000204653	ASPDH	4.0111	3.64837	6.04356e-05	0.144752	1.69081e-17	11	11
ENSG00000101452	DHX35	3.99053	2.3151	6.59252e-05	0.23206	1.89922e-28	15	18
ENSG00000149927	DOC2A	3.98998	5.28608	6.60795e-05	0.0609122	6.77003e-08	36	48
ENSG00000152795	HNRNPDL	-3.98237	-258.609	6.82319e-05	0.00947136	0.0357099	2	2
ENSG00000175224	ATG13	3.97916	171.9	6.916e-05	0.0187514	0.00305589	1	1
ENSG00000088298	EDEM2	3.97867	6.50899	6.93019e-05	0.0780719	8.34706e-10	25	29
ENSG00000157150	TIMP4	3.97677	6.46325	6.98562e-05	0.0742825	2.21351e-09	36	44
ENSG00000164088	PPM1M	-3.97488	-2.6515	7.04154e-05	0.148249	6.46e-18	27	39
ENSG00000151665	PIGF	-3.94627	-6.05872	7.93781e-05	0.0434645	5.66899e-06	33	35
ENSG00000230069	LRRC37A15P	3.93981	4.0789	8.15478e-05	0.122563	6.98139e-15	15	18
ENSG00000166159	LRTM2	-3.93184	-166.094	8.42998e-05	0.0269875	0.000369461	3	3
ENSG00000167136	ENDOG	-3.92677	-3.52539	8.6093e-05	0.189052	6.49529e-23	12	13
ENSG00000183831	ANKRD45	3.91661	4.37541	8.98019e-05	0.0784338	7.60346e-10	20	28
ENSG00000166888	STAT6	-3.91629	-7.66136	8.99217e-05	0.0598906	8.78198e-08	12	13
ENSG00000197061	H4C3	-3.91161	-3.92945	9.16818e-05	0.0957481	8.48455e-12	22	26
ENSG00000065413	ANKRD44	3.91025	7.73888	9.2201e-05	0.0132369	0.0129475	8	8
ENSG00000204969	PCDHA2	3.90441	6.97334	9.4454e-05	0.0271773	0.000352025	6	8
ENSG00000232300	FAM215B	-3.89801	-7.30639	9.69852e-05	0.388425	1.69293e-51	27	35
ENSG00000143590	EFNA3	-3.89705	-182	9.73728e-05	0.0391684	1.68153e-05	2	2
ENSG00000079691	CARMIL1	-3.88865	-12.5383	0.000100805	0.0294785	0.000196031	12	15
ENSG00000204706	MAMDC2-AS1	3.882	162.156	0.0001036	0.0222164	0.00125102	1	1
ENSG00000164037	SLC9B1	3.88111	2.26418	0.000103981	0.298877	1.12945e-37	32	39
ENSG00000113209	PCDHB5	3.86938	9.01467	0.000109111	0.0955782	8.87028e-12	31	37
ENSG00000168374	ARF4	3.86416	13.701	0.000111472	0.0137427	0.0113228	15	15
ENSG00000181856	SLC2A4	-3.86272	-15.8854	0.000112132	0.0142714	0.00984635	5	5
ENSG00000261311	NA	-3.85842	-19.4711	0.000114123	0.00868693	0.044329	6	9
ENSG00000186326	RGS9BP	-3.85244	-3.65906	0.000116946	0.0777798	8.99949e-10	18	25
ENSG00000255571	MIR9-3HG	-3.85065	-7.2131	0.000117803	0.0534966	4.46137e-07	8	9
ENSG00000108654	DDX5	3.85032	13.0314	0.000117962	0.0444607	4.4055e-06	10	14
ENSG00000164045	CDC25A	-3.8453	-25.7611	0.000120403	0.0470326	2.29709e-06	14	16
ENSG00000239474	KLHL41	-3.84104	-2.91622	0.000122513	0.27148	8.62073e-34	16	17
ENSG00000068912	ERLEC1	-3.83075	-166.952	0.000127755	0.0354695	4.28938e-05	4	4
ENSG00000037474	NSUN2	3.82153	2.39694	0.000132627	0.321012	6.38691e-41	40	43
ENSG00000103723	AP3B2	-3.82088	-3.91126	0.000132975	0.102346	1.50272e-12	8	8
ENSG00000065809	FAM107B	3.80113	10.128	0.00014404	0.0505978	9.30731e-07	39	41
ENSG00000228451	SDAD1P1	3.79775	0.100829	0.000146016	0.444653	3.03578e-61	9	9
ENSG00000253734	LINC01289	3.79542	10.5553	0.000147394	0.0276803	0.000309701	31	35
ENSG00000237289	CKMT1B	3.79413	14.31	0.000148162	0.0115007	0.0205864	11	12
ENSG00000122490	SLC66A2	-3.78859	-14.066	0.000151507	0.0357778	3.96724e-05	10	11
ENSG00000159377	PSMB4	3.77663	10.373	0.000158963	0.0325684	8.94727e-05	2	2
ENSG00000269293	ZSCAN16-AS1	-3.76076	-197.891	0.0001694	0.0388298	1.832e-05	1	1
ENSG00000171714	ANO5	3.75561	3.85817	0.000172919	0.137449	1.24677e-16	29	39
ENSG00000183196	CHST6	3.75276	157.088	0.0001749	0.00899681	0.0406895	1	1
ENSG00000150977	RILPL2	-3.75043	-158.49	0.000176532	0.0223977	0.00119413	2	2
ENSG00000174276	ZNHIT2	3.7462	252.789	0.000179531	0.0344222	5.59263e-05	3	4
ENSG00000144619	CNTN4	-3.74205	0.375909	0.000182522	0.0643095	2.84669e-08	54	64
ENSG00000171045	TSNARE1	3.73726	3.69938	0.000186034	0.148248	6.46293e-18	19	21
ENSG00000125952	MAX	3.73672	7.00065	0.000186437	0.0673881	1.29633e-08	14	14
ENSG00000158092	NCK1	-3.73043	-15.9458	0.000191155	0.010312	0.0283868	28	33
ENSG00000214117	NA	3.73035	14.923	0.000191213	0.0187662	0.00304415	5	5
ENSG00000154217	PITPNC1	-3.72937	-10.5451	0.000191962	0.0327326	8.58235e-05	3	3
ENSG00000111237	VPS29	-3.72551	-11.7184	0.000194924	0.017361	0.00438397	8	8
ENSG00000119042	SATB2	-3.72403	-7.0794	0.000196069	0.0105722	0.0264505	27	31
ENSG00000259295	CSPG4P12	-3.71837	-5.20339	0.000200514	0.262653	1.43224e-32	43	57
ENSG00000131495	NDUFA2	3.71396	11.2531	0.000204045	0.0174842	0.00424575	7	9
ENSG00000164023	SGMS2	-3.71327	-153.438	0.0002046	0.0217334	0.00141622	1	1
ENSG00000196376	SLC35F1	3.70177	213.048	0.000214102	0.0170022	0.00481325	4	5
ENSG00000235257	ITGA9-AS1	-3.69831	-154.068	0.000217039	0.0244037	0.000714377	2	2
ENSG00000169169	CPT1C	3.69771	2.17691	0.000217552	0.213121	5.6424e-26	24	31
ENSG00000179218	CALR	3.69766	170.479	0.0002176	0.034472	5.5226e-05	1	1
ENSG00000110497	AMBRA1	-3.69655	-17.2361	0.000218551	0.0152276	0.00765578	7	8
ENSG00000139921	TMX1	-3.6936	-165.606	0.0002211	0.0218523	0.00137363	1	1
ENSG00000156475	PPP2R2B	3.69302	2.79753	0.000221604	0.0115334	0.0204062	21	22
ENSG00000118997	DNAH7	3.68613	3.95702	0.000227691	0.129419	1.10194e-15	13	15
ENSG00000162627	SNX7	3.68455	15.5882	0.000229109	0.0180824	0.00363458	24	25
ENSG00000048342	CC2D2A	3.68168	171.465	0.0002317	0.0370585	2.86849e-05	1	1
ENSG00000115194	SLC30A3	-3.67979	-55.1303	0.000233423	0.00886238	0.0422284	3	3
ENSG00000180957	PITPNB	-3.67759	-12.7607	0.000235452	0.0270343	0.000365086	43	46
ENSG00000266348	NA	-3.67641	-34.8385	0.000236536	0.0323156	9.53966e-05	9	12
ENSG00000129968	ABHD17A	-3.67591	-2164.68	0.000237	0.0376597	2.46353e-05	1	3
ENSG00000176490	DIRAS1	-3.67555	-16.1238	0.000237336	0.0106843	0.0256591	11	12
ENSG00000146555	SDK1	-3.67552	-10.9756	0.00023737	0.0182912	0.00344295	12	16
ENSG00000174516	PELI3	-3.65941	-178.13	0.0002528	0.0134545	0.012221	1	1
ENSG00000178467	P4HTM	-3.65936	-4.37822	0.000252846	0.109701	2.15469e-13	13	14
ENSG00000120896	SORBS3	-3.6515	-9.60519	0.00026071	0.0353039	4.47315e-05	17	17
ENSG00000120451	SNX19	3.63278	3.68933	0.000280388	0.199308	3.304e-24	12	12
ENSG00000180720	CHRM4	3.62848	201.157	0.0002851	0.0313191	0.000122838	1	2
ENSG00000230319	TTLL1-AS1	-3.62841	-2.69683	0.00028517	0.217877	1.36725e-26	20	23
ENSG00000119906	SLF2	-3.62548	-17.234	0.000288424	0.0155266	0.00707805	12	13
ENSG00000149564	ESAM	-3.61651	-165.156	0.0002986	0.017573	0.00414884	1	1
ENSG00000119125	GDA	3.60224	9.87675	0.000315482	0.0134242	0.0123198	15	17
ENSG00000164180	TMEM161B	-3.59744	-11.415	0.000321364	0.0262861	0.000441786	47	56
ENSG00000156171	DRAM2	-3.59504	-1.96584	0.000324347	0.339166	1.15565e-43	13	14
ENSG00000102898	NUTF2	-3.59435	-150.426	0.0003252	0.00873208	0.0437781	1	2
ENSG00000051825	MPHOSPH9	-3.58763	-9.93864	0.000333696	0.0563204	2.17769e-07	9	9
ENSG00000183527	PSMG1	-3.58547	-2.23344	0.000336466	0.246268	2.42264e-30	36	39
ENSG00000178741	COX5A	3.58175	155.227	0.0003413	0.00882138	0.0427097	1	1
ENSG00000156374	PCGF6	-3.57705	-155.757	0.0003475	0.00917326	0.0387582	1	1
ENSG00000152219	ARL14EP	-3.56964	-5.30753	0.000357466	0.103004	1.26367e-12	20	30
ENSG00000143409	MINDY1	3.56902	6.81933	0.000358312	0.113964	6.94781e-14	34	38
ENSG00000134255	CEPT1	3.56825	11.5798	0.000359379	0.0277459	0.000304576	5	8
ENSG00000143575	HAX1	-3.56538	-64.4725	0.000363328	0.0361702	3.59198e-05	4	6
ENSG00000164758	MED30	-3.55899	-4.93239	0.000372285	0.0673404	1.31226e-08	15	15
ENSG00000160685	ZBTB7B	-3.55687	-178.612	0.000375295	0.0220069	0.00132016	4	4
ENSG00000266718	ENSG00000266718	-3.55498	-2.79559	0.000378012	0.179848	9.12602e-22	37	42
ENSG00000133619	KRBA1	3.55325	143.167	0.0003805	0.0161017	0.00608861	1	1
ENSG00000247400	DNAJC3-DT	3.55215	16.3012	0.000382092	0.10082	2.24486e-12	18	23
ENSG00000146021	KLHL3	-3.54842	-7.35488	0.000387553	0.0289177	0.000226062	27	39
ENSG00000132600	PRMT7	-3.53143	-4.46492	0.000413315	0.0634298	3.56325e-08	6	8
ENSG00000100678	SLC8A3	3.52095	9.22867	0.00043	0.0375296	2.54596e-05	1	1
ENSG00000254635	WAC-AS1	-3.51761	-2.27913	0.000435451	0.432255	5.16296e-59	20	21
ENSG00000256304	NA	-3.50862	-26.7047	0.000450434	0.0109019	0.0241925	14	18
ENSG00000084764	MAPRE3	-3.50527	-6.31315	0.000456146	0.0771251	1.0653e-09	5	5
ENSG00000025708	TYMP	3.50326	148.786	0.0004596	0.0244027	0.000714563	1	1
ENSG00000104863	LIN7B	-3.5019	-7.62364	0.000461957	0.0371516	2.80167e-05	2	4
ENSG00000169925	BRD3	3.49777	4.05777	0.000469163	0.209501	1.65003e-25	19	22
ENSG00000163959	SLC51A	3.49031	2.45885	0.000482461	0.231605	2.18073e-28	16	18
ENSG00000151148	UBE3B	3.48665	7.07766	0.000489112	0.0384819	2.00061e-05	5	7
ENSG00000084234	APLP2	3.47513	147.518	0.0005106	0.0322467	9.70787e-05	1	1
ENSG00000164002	EXO5	-3.47508	-1.82029	0.000510702	0.549226	2.60722e-82	47	48
ENSG00000153495	TEX29	-3.46879	-2.45118	0.000522803	0.398694	3.28716e-53	48	56
ENSG00000152404	CWF19L2	-3.46746	-28.9514	0.000525411	0.019946	0.00224397	19	20
ENSG00000144677	CTDSPL	-3.46058	-13.4849	0.000539009	0.0149642	0.0082042	16	21
ENSG00000100027	YPEL1	-3.46024	-4.18136	0.000539686	0.181807	5.21327e-22	13	16
ENSG00000107341	UBE2R2	-3.45826	-13.3101	0.000543669	0.0265343	0.000414698	40	54
ENSG00000232774	LINC03033	3.45397	174.79	0.0005524	0.0127591	0.0147014	1	2
ENSG00000174456	C12orf76	3.4503	15.5681	0.000559965	0.0251495	0.000590425	7	7
ENSG00000223960	CHROMR	-3.44903	-181.984	0.0005626	0.0288263	0.000231381	1	1
ENSG00000168917	SLC35G2	-3.44725	-4.9892	0.000566328	0.087878	6.60088e-11	112	119
ENSG00000171823	FBXL14	-3.44696	-162.867	0.000566923	0.016697	0.00521193	2	2
ENSG00000118298	CA14	3.44411	4.36684	0.000572941	0.0392097	1.66407e-05	7	14
ENSG00000104408	EIF3E	3.44047	4.31411	0.0005807	0.0827969	2.46412e-10	14	14
ENSG00000206344	HCG27	-3.43919	-13.0788	0.000583451	0.161688	1.54712e-19	9	11
ENSG00000173011	TADA2B	-3.43871	-173.603	0.000584498	0.0250842	0.000600359	2	2
ENSG00000102471	NDFIP2	-3.43766	-8.14614	0.000586762	0.0204471	0.00197192	7	8
ENSG00000159147	DONSON	-3.43643	-176.873	0.000589441	0.0229657	0.00103229	2	2
ENSG00000180921	FAM83H	3.43389	1.89249	0.000594981	0.269474	1.63734e-33	39	52
ENSG00000224086	PPM1F-AS1	3.43093	1.60949	0.000601505	0.58842	1.72356e-91	13	16
ENSG00000213047	DENND1B	3.43014	10.9288	0.000603261	0.0158228	0.00654963	11	11
ENSG00000127824	TUBA4A	3.42562	134.61	0.0006134	0.00957034	0.034754	1	1
ENSG00000198876	DCAF12	3.42048	156.755	0.0006251	0.013538	0.0119535	1	1
ENSG00000137338	PGBD1	3.41889	7.27251	0.00062877	0.0758862	1.46548e-09	15	16
ENSG00000138600	SPPL2A	3.41848	5.70707	0.000629729	0.131928	5.58794e-16	13	18
ENSG00000006128	TAC1	-3.41505	-158.971	0.0006377	0.0211317	0.00165322	1	1
ENSG00000090097	PCBP4	-3.41439	-196.91	0.000639241	0.019118	0.00277924	3	3
ENSG00000164707	SLC13A4	-3.41373	-31.749	0.000640808	0.0119464	0.0182655	5	8
ENSG00000137288	UQCC2	-3.41136	-137.49	0.0006464	0.00935337	0.0368854	1	1
ENSG00000198837	DENND4B	-3.40918	-10.6189	0.000651577	0.00974413	0.0331394	9	9
ENSG00000172113	NME6	3.40107	5.3705	0.000671215	0.0750007	1.84032e-09	5	7
ENSG00000182255	KCNA4	-3.39824	-22.0097	0.0006782	0.00905543	0.040037	21	24
ENSG00000242866	STRC	3.3957	1.8236	0.000684531	0.141979	3.61734e-17	24	28
ENSG00000104388	RAB2A	-3.38979	-9.06272	0.000699464	0.0387789	1.85576e-05	19	21
ENSG00000134247	PTGFRN	-3.3712	-15.5394	0.000748426	0.013514	0.0120298	9	10
ENSG00000141524	TMC6	3.36928	19.2963	0.00075365	0.0211816	0.00163212	14	14
ENSG00000164794	KCNV1	3.36901	174.43	0.0007544	0.0196314	0.00243381	1	1
ENSG00000260942	CAPN10-DT	-3.36563	-215.747	0.000763695	0.0238294	0.000827417	2	2
ENSG00000105928	GSDME	-3.35884	-3.49775	0.000782711	0.212624	6.53926e-26	13	15
ENSG00000002822	MAD1L1	-3.3585	-8.73237	0.000783681	0.0566593	1.99794e-07	11	12
ENSG00000112855	HARS2	3.35845	157.562	0.0007838	0.0194291	0.00256444	1	1
ENSG00000100346	CACNA1I	-3.35699	-181.831	0.000787973	0.012259	0.0167996	3	3
ENSG00000167842	MIS12	-3.35576	-4.31568	0.000791467	0.120911	1.08714e-14	51	62
ENSG00000055483	USP36	-3.35451	-2.93115	0.00079507	0.220029	7.1817e-27	16	18
ENSG00000136942	RPL35	-3.35214	-220.279	0.0008019	0.0274716	0.000326602	1	2
ENSG00000171680	PLEKHG5	3.3496	6.30298	0.000809285	0.0687882	9.0599e-09	50	57
ENSG00000160633	SAFB	-3.34867	-190.739	0.000812	0.035145	4.65688e-05	1	1
ENSG00000175274	TP53I11	3.34844	174.777	0.000812688	0.0178211	0.00388972	2	2
ENSG00000196876	SCN8A	3.34609	165.518	0.000819611	0.0287632	0.000235118	3	3
ENSG00000145715	RASA1	-3.34252	-16.0409	0.000830228	0.0233889	0.00092619	10	13
ENSG00000161328	LRRC56	3.34004	2.74704	0.000837664	0.185691	1.71071e-22	31	39
ENSG00000198356	GET3	3.33778	181.575	0.0008445	0.0188072	0.00301202	1	1
ENSG00000231252	ENSG00000231252	3.33166	132.757	0.000863304	0.0191063	0.00278769	2	2
ENSG00000159720	ATP6V0D1	3.3283	6.04586	0.000873787	0.0798281	5.3067e-10	11	13
ENSG00000176022	B3GALT6	3.32194	15.3496	0.000893949	0.0254675	0.000544391	6	10
ENSG00000198554	WDHD1	3.32114	5.43712	0.000896492	0.0734153	2.76597e-09	14	15
ENSG00000132669	RIN2	-3.32011	-7.98956	0.000899832	0.0396315	1.49555e-05	52	64
ENSG00000148600	CDHR1	-3.31785	-1.66283	0.000907117	0.55293	3.83276e-83	58	67
ENSG00000234616	JRK	3.31519	2.77763	0.000915801	0.283712	1.65971e-35	73	100
ENSG00000138430	OLA1	-3.3148	-2.446	0.000917096	0.292031	1.08832e-36	43	53
ENSG00000136270	TBRG4	-3.30926	-4.25629	0.000935416	0.167785	2.79393e-20	20	23
ENSG00000165185	KIAA1958	-3.30078	-8.15056	0.000964157	0.0208283	0.00178748	15	18
ENSG00000259775	EIF5-DT	-3.29803	-1.78484	0.000973648	0.208729	2.07351e-25	22	25
ENSG00000126814	TRMT5	-3.29053	-338.394	0.001	0.0261167	0.000461281	1	2
ENSG00000143971	ETAA1	3.28733	4.14023	0.00101142	0.185602	1.75514e-22	18	20
ENSG00000100271	TTLL1	-3.28721	-5.93772	0.00101185	0.105629	6.32612e-13	12	14
ENSG00000126777	KTN1	3.28168	6.31848	0.00103191	0.0541074	3.82052e-07	16	18
ENSG00000087338	GMCL1	3.27486	4.40174	0.00105714	0.109104	2.524e-13	9	9
ENSG00000065665	SEC61A2	-3.27157	-8.04938	0.00106954	0.0452823	3.57819e-06	33	36
ENSG00000144306	SCRN3	3.26735	3.0194	0.00108559	0.204704	6.7925e-25	13	14
ENSG00000154479	CFAP210	3.26511	2.14296	0.00109422	0.43219	5.30258e-59	96	97
ENSG00000106003	LFNG	-3.26231	-169.008	0.00110507	0.0221094	0.00128587	2	2
ENSG00000143434	SEMA6C	-3.26117	-13.4933	0.00110955	0.0288085	0.000232429	8	9
ENSG00000157193	LRP8	3.26076	7.67778	0.00111114	0.0332972	7.43775e-05	21	21
ENSG00000137463	MGARP	-3.25931	-16.4089	0.00111684	0.0132175	0.0130144	2	2
ENSG00000102858	MGRN1	-3.25497	-3.00964	0.00113404	0.144075	2.03655e-17	12	13
ENSG00000231955	ENSG00000231955	-3.25473	-7.92279	0.00113498	0.0546509	3.32807e-07	15	15
ENSG00000198176	TFDP1	3.25323	165.696	0.001141	0.0168294	0.00503504	1	1
ENSG00000189423	USP32P3	-3.25074	-10.2206	0.00115105	0.0503622	9.88019e-07	4	6
ENSG00000108559	NUP88	3.24574	3.5687	0.00117144	0.247223	1.80205e-30	69	74
ENSG00000117222	RBBP5	3.24109	6.77162	0.00119073	0.0756268	1.56663e-09	22	26
ENSG00000006071	ABCC8	-3.24047	-2.15764	0.00119334	0.179958	8.84388e-22	36	46
ENSG00000181915	ADO	3.24044	11.3526	0.00119346	0.0209	0.0017548	17	20
ENSG00000188848	BEND4	-3.24001	-12.6001	0.00119524	0.0554015	2.75039e-07	20	21
ENSG00000115828	QPCT	3.23786	4.60507	0.0012043	0.0871984	7.87506e-11	17	18
ENSG00000183691	NOG	3.2351	140.732	0.001216	0.0495464	1.215e-06	1	1
ENSG00000185274	GALNT17	3.23435	25.5779	0.00121922	0.0126743	0.0150373	10	11
ENSG00000261654	ENSG00000261654	-3.22991	-8.08569	0.0012383	0.0350541	4.76535e-05	12	18
ENSG00000141127	PRPSAP2	-3.22926	-2.42207	0.00124112	0.261189	2.2758e-32	89	112
ENSG00000108272	NA	3.22008	2.82237	0.00128153	0.21084	1.10992e-25	6	6
ENSG00000239282	CASTOR1	3.21997	11.7725	0.00128203	0.0389906	1.75896e-05	5	7
ENSG00000065600	PACC1	-3.21239	-4.20019	0.00131635	0.129478	1.08427e-15	6	7
ENSG00000076685	NT5C2	3.21122	4.66087	0.00132173	0.0209475	0.00173345	6	7
ENSG00000114933	INO80D	-3.20588	-4.98419	0.00134652	0.0443379	4.54455e-06	39	49
ENSG00000175550	DRAP1	-3.20568	-172.569	0.00134746	0.0380466	2.2337e-05	2	2
ENSG00000233821	ENOX1-AS1	-3.20438	-184.658	0.00135353	0.0361239	3.63436e-05	2	2
ENSG00000231185	SPRY4-AS1	-3.20407	-154.802	0.001355	0.0411599	1.01583e-05	1	2
ENSG00000250067	YJEFN3	3.20354	3.8082	0.0013575	0.0338431	6.4767e-05	15	18
ENSG00000188010	MORN2	-3.20025	-10.9805	0.00137308	0.0138109	0.0111202	7	10
ENSG00000159202	UBE2Z	-3.19862	-9.75681	0.00138089	0.0344084	5.6123e-05	28	32
ENSG00000108786	HSD17B1	3.19859	31.3137	0.00138104	0.0209548	0.00173023	2	3
ENSG00000130766	SESN2	-3.19611	-153.757	0.00139292	0.0137311	0.0113578	2	2
ENSG00000144034	TPRKB	3.19082	0.984911	0.00141868	0.0141219	0.0102427	26	32
ENSG00000116406	EDEM3	3.18976	7.2717	0.00142392	0.104642	8.20631e-13	20	23
ENSG00000138085	ATRAID	-3.18656	-11.3097	0.00143976	0.0219574	0.00133705	4	4
ENSG00000155729	KCTD18	3.18264	4.28807	0.00145937	0.0110943	0.0229678	37	44
ENSG00000148468	FAM171A1	-3.18139	-11.6589	0.00146571	0.0286877	0.000239676	8	9
ENSG00000115649	CNPPD1	-3.18128	-7.86037	0.00146626	0.0538765	4.05122e-07	2	2
ENSG00000164574	GALNT10	-3.1807	-9.19728	0.00146921	0.0456674	3.2458e-06	8	8
ENSG00000079616	KIF22	-3.18046	-176.484	0.00147041	0.0211881	0.00162939	2	2
ENSG00000145029	NICN1	3.17315	7.80302	0.00150796	0.0595096	9.67637e-08	44	48
ENSG00000188130	MAPK12	3.17164	6.11248	0.00151579	0.211259	9.8034e-26	16	21
ENSG00000176261	ZBTB8OS	-3.16855	-154.895	0.001532	0.00912757	0.039249	1	1
ENSG00000204991	SPIRE2	-3.16693	-5.12734	0.00154058	0.225192	1.52085e-27	30	40
ENSG00000214106	PAXIP1-AS2	-3.1631	-145.242	0.001561	0.0334203	7.20925e-05	1	1
ENSG00000227354	RBM26-AS1	3.16303	1.86998	0.00156136	0.405338	2.4771e-54	52	62
ENSG00000170017	ALCAM	-3.15945	-189.911	0.00158067	0.0252503	0.000575423	3	4
ENSG00000163961	RNF168	3.15847	131.672	0.001586	0.0337976	6.55182e-05	1	1
ENSG00000134569	LRP4	3.15726	8.3944	0.00159261	0.0346831	5.23495e-05	5	6
ENSG00000185347	TEDC1	3.15574	18.7665	0.00160092	0.0200692	0.00217376	7	15
ENSG00000154511	DIPK1A	3.15458	9.75902	0.00160727	0.100932	2.17942e-12	11	12
ENSG00000104870	FCGRT	3.15415	5.19663	0.00160965	0.0744252	2.13379e-09	13	15
ENSG00000107874	CUEDC2	3.15264	155.626	0.001618	0.021057	0.00168531	1	1
ENSG00000154447	SH3RF1	-3.15241	-12.889	0.0016193	0.0124586	0.0159276	47	51
ENSG00000114302	PRKAR2A	3.15089	11.645	0.00162773	0.0321598	9.92428e-05	6	7
ENSG00000104904	OAZ1	-3.14763	-181.556	0.00164599	0.0253807	0.000556588	2	2
ENSG00000162642	C1orf52	-3.1436	-4.64726	0.00166883	0.140285	5.74967e-17	7	9
ENSG00000198053	SIRPA	3.14161	15.0904	0.00168021	0.0875113	7.26041e-11	7	11
ENSG00000068650	ATP11A	-3.1408	-9.59344	0.00168489	0.0491555	1.34154e-06	9	9
ENSG00000143612	C1orf43	3.13784	156.579	0.001702	0.0168731	0.00497795	1	1
ENSG00000117228	GBP1	-3.12418	-137.549	0.001783	0.00827793	0.0496632	1	1
ENSG00000128254	YWHAH-AS1	3.12369	121.932	0.001786	0.00847868	0.0469654	1	1
ENSG00000177692	DNAJC28	-3.12076	-3.99442	0.00180385	0.128651	1.35588e-15	24	24
ENSG00000170632	ARMC10	3.12024	5.24605	0.00180702	0.0549215	3.10705e-07	26	31
ENSG00000157470	FAM81A	3.11971	6.92316	0.00181032	0.0169267	0.00490885	23	26
ENSG00000143858	SYT2	-3.11846	-138.102	0.001818	0.013703	0.0114424	1	1
ENSG00000114054	PCCB	-3.11822	-1.57866	0.00181948	0.177926	1.57932e-21	13	16
ENSG00000102974	CTCF	-3.11388	-253.986	0.00184645	0.0330399	7.93909e-05	2	3
ENSG00000178966	RMI1	3.11376	7.04334	0.00184717	0.0438516	5.13996e-06	21	27
ENSG00000173295	FAM86B3P	3.11131	1.28397	0.00186261	0.445003	2.62115e-61	19	26
ENSG00000006607	FARP2	-3.10887	-3.12553	0.00187805	0.244821	3.79167e-30	32	37
ENSG00000204138	PHACTR4	3.10635	3.16507	0.00189414	0.216708	1.93882e-26	55	59
ENSG00000100206	DMC1	-3.10606	-135.798	0.001896	0.0166623	0.00525926	1	1
ENSG00000120910	PPP3CC	3.09879	5.58586	0.00194314	0.0404338	1.22075e-05	37	41
ENSG00000157837	SPPL3	3.09864	4.4244	0.00194411	0.153171	1.65763e-18	15	18
ENSG00000132694	ARHGEF11	-3.09556	-9.59478	0.00196443	0.0399647	1.37463e-05	3	4
ENSG00000246560	UBE2D3-AS1	-3.09457	-172.132	0.001971	0.0194557	0.00254686	1	1
ENSG00000169519	METTL15	-3.09355	-7.69593	0.00197774	0.0619151	5.2433e-08	6	7
ENSG00000091592	NLRP1	-3.09351	-21.242	0.00197802	0.0224681	0.00117275	7	9
ENSG00000198721	ECI2	3.09252	3.22604	0.00198462	0.227178	8.34816e-28	18	18
ENSG00000072609	CHFR	-3.0918	-166.762	0.00198944	0.0288653	0.000229095	2	2
ENSG00000103034	NDRG4	3.08974	2.36647	0.00200332	0.012303	0.0166034	40	48
ENSG00000174951	FUT1	3.08926	2.77882	0.00200658	0.186682	1.28611e-22	18	21
ENSG00000081853	PCDHGA2	3.08763	5.6159	0.00201761	0.0547119	3.27691e-07	19	25
ENSG00000010438	PRSS3	3.08424	7.16601	0.00204071	0.115083	5.1575e-14	31	38
ENSG00000162493	PDPN	3.0835	7.86367	0.00204581	0.0877777	6.77509e-11	21	23
ENSG00000198948	MFAP3L	-3.08236	-12.8835	0.00205368	0.0257941	0.000500844	11	13
ENSG00000228389	NA	-3.08018	-9.68724	0.00206879	0.0521161	6.33289e-07	14	16
ENSG00000108950	FAM20A	3.07842	163.144	0.002081	0.0128092	0.0145068	1	1
ENSG00000149573	MPZL2	3.07614	16.5049	0.00209702	0.013303	0.0127222	43	48
ENSG00000112419	PHACTR2	-3.07125	-7.52203	0.00213166	0.0545621	3.40397e-07	9	9
ENSG00000114779	ABHD14B	-3.07064	-8.03003	0.00213598	0.0154113	0.00729545	18	26
ENSG00000086200	IPO11	-3.06898	-11.5382	0.00214788	0.0588168	1.15421e-07	19	23
ENSG00000215252	GOLGA8B	3.06698	0.912898	0.00216233	0.210944	1.07644e-25	25	31
ENSG00000185658	BRWD1	3.06162	7.08122	0.0022014	0.208469	2.23911e-25	20	21
ENSG00000011114	BTBD7	3.0459	9.40958	0.00231988	0.0187814	0.00303219	6	6
ENSG00000108384	RAD51C	3.04067	1.75959	0.00236056	0.524888	5.29858e-77	88	90
ENSG00000234336	JAZF1-AS1	3.04008	2.68828	0.00236519	0.344331	1.85818e-44	10	11
ENSG00000112031	MTRF1L	-3.03824	-6.91973	0.00237961	0.0899958	3.80577e-11	26	29
ENSG00000213860	RPL21P75	3.03168	998.834	0.002432	0.0156874	0.00678603	1	2
ENSG00000182256	GABRG3	3.02956	22.5273	0.00244912	0.013455	0.0122195	11	13
ENSG00000101473	ACOT8	3.02941	20.5923	0.00245032	0.0802244	4.79057e-10	7	10
ENSG00000175264	CHST1	-3.02872	-3.95232	0.00245592	0.132187	5.20992e-16	40	43
ENSG00000000938	FGR	3.02845	188.534	0.00245813	0.0519236	6.64976e-07	2	2
ENSG00000135390	ATP5MC2	-3.02547	-5.85935	0.00248245	0.0920028	2.25631e-11	7	9
ENSG00000239235	NA	-3.02402	-5.6445	0.00249444	0.181658	5.43989e-22	38	45
ENSG00000204624	DISP3	-3.02337	-9.14032	0.00249974	0.048967	1.40716e-06	4	4
ENSG00000168016	TRANK1	3.0197	3.56517	0.00253021	0.073254	2.88293e-09	41	51
ENSG00000110881	ASIC1	3.01961	243.419	0.002531	0.033497	7.0704e-05	1	3
ENSG00000138778	CENPE	-3.01589	-5.29776	0.00256226	0.156684	6.24939e-19	29	33
ENSG00000171224	FAM241B	3.01392	144.131	0.002579	0.0271556	0.000353974	1	1
ENSG00000072422	RHOBTB1	-3.01176	-8.06941	0.00259738	0.146128	1.15867e-17	23	25
ENSG00000247796	MOCS2-DT	-3.0097	-2.49809	0.00261503	0.266264	4.55459e-33	20	23
ENSG00000087087	SRRT	3.00762	161.35	0.002633	0.0389189	1.79115e-05	1	1
ENSG00000198887	SMC5	-3.00362	-150.528	0.00266787	0.0260883	0.000464634	3	3
ENSG00000242247	ARFGAP3	-3.00296	-8.05	0.00267366	0.0371485	2.80389e-05	14	15
ENSG00000125611	CHCHD5	3.00166	3.13531	0.0026851	0.194509	1.33763e-23	7	8
ENSG00000246448	NA	-3.00103	-2.66474	0.0026907	0.447096	1.08871e-61	45	74
ENSG00000115234	SNX17	-3.00094	-11.0953	0.0026915	0.0320419	0.000102254	12	17
ENSG00000113719	ERGIC1	3.00046	8.06091	0.00269571	0.0149614	0.00821023	6	6
ENSG00000128052	KDR	2.99946	154.987	0.00270459	0.0187513	0.00305596	2	2
ENSG00000188315	C3orf62	2.9993	10.9307	0.00270599	0.0276239	0.000314181	8	13
ENSG00000110060	PUS3	-2.9975	-159.307	0.002722	0.0136853	0.0114963	1	1
ENSG00000135100	HNF1A	-2.99542	-5.74601	0.00274066	0.14462	1.75347e-17	14	17
ENSG00000104903	LYL1	2.99537	19.5542	0.00274114	0.0387119	1.88749e-05	12	13
ENSG00000184206	GOLGA6L4	-2.99346	-4.77543	0.00275833	0.0748144	1.93063e-09	21	24
ENSG00000166477	LEO1	-2.99327	-764.684	0.00276003	0.0652232	2.25434e-08	2	2
ENSG00000188690	UROS	2.9913	1.78926	0.0027779	0.586773	4.35816e-91	12	16
ENSG00000079313	REXO1	2.98943	158.374	0.002795	0.0629602	4.01668e-08	1	1
ENSG00000198406	BZW1P2	2.9891	139.207	0.002798	0.0161681	0.00598385	1	1
ENSG00000267481	ENSG00000267481	2.98685	-13.7188	0.00281868	0.0281863	0.000272279	2	3
ENSG00000151348	EXT2	2.98669	3.12123	0.00282016	0.187819	9.27126e-23	13	13
ENSG00000198626	RYR2	2.98627	134.419	0.00282402	0.0129523	0.0139647	3	3
ENSG00000173200	PARP15	2.98483	11.0156	0.0028374	0.0165931	0.00535504	23	28
ENSG00000233593	LINC02609	2.98293	18.2653	0.002855	0.0158096	0.00657229	1	1
ENSG00000125458	NT5C	2.98283	224.966	0.00285601	0.00886988	0.0421409	7	7
ENSG00000152465	NMT2	2.98224	9.01521	0.00286148	0.0492546	1.30828e-06	32	35
ENSG00000141314	RHBDL3	2.98016	8.79684	0.002881	0.0408123	1.10922e-05	6	6
ENSG00000160087	UBE2J2	-2.97984	-151.7	0.002884	0.0266071	0.000407074	1	2
ENSG00000112715	VEGFA	-2.97897	-12.4954	0.00289218	0.0294172	0.00019911	8	8
ENSG00000184060	ADAP2	2.97867	164.154	0.002895	0.0238259	0.000828172	1	1
ENSG00000134900	TPP2	2.97548	32.4141	0.00292526	0.0600206	8.4959e-08	6	10
ENSG00000105518	TMEM205	2.97525	18.577	0.00292753	0.0216637	0.00144184	6	7
ENSG00000162384	CZIB	2.97439	3.98758	0.0029357	0.208327	2.3344e-25	41	59
ENSG00000122068	FYTTD1	-2.96871	-15.2291	0.00299049	0.0422594	7.69081e-06	21	29
ENSG00000236668	LHX2-AS1	-2.96771	-160.202	0.00300028	0.0355081	4.24768e-05	2	2
ENSG00000120063	GNA13	-2.96502	-10.3202	0.00302659	0.0205834	0.00190385	37	39
ENSG00000159915	ZNF233	-2.96251	-8.80165	0.00305137	0.0411849	1.00941e-05	17	18
ENSG00000125430	HS3ST3B1	-2.95962	-6.50599	0.00308023	0.142993	2.73973e-17	25	27
ENSG00000037749	MFAP3	2.94909	11.2977	0.0031871	0.0516224	7.17775e-07	7	8
ENSG00000077942	FBLN1	-2.94896	-16.5014	0.00318847	0.0118124	0.0189335	6	6
ENSG00000248971	KRT8P46	2.94778	2.61834	0.00320066	0.145497	1.37801e-17	29	35
ENSG00000173486	FKBP2	2.94683	14.9023	0.00321051	0.013564	0.0118716	23	31
ENSG00000119986	AVPI1	-2.93995	-5.78264	0.00328264	0.114371	6.23383e-14	15	17
ENSG00000187566	NHLRC1	2.93754	8.48928	0.00330828	0.0455108	3.37705e-06	12	13
ENSG00000186522	SEPTIN10	2.93555	3.53935	0.00332952	0.20672	3.75103e-25	22	23
ENSG00000235513	L3MBTL2-AS1	2.93298	6.5057	0.00335729	0.0909826	2.94344e-11	8	10
ENSG00000164978	NUDT2	-2.92594	-2.17133	0.00343416	0.390755	6.96203e-52	30	31
ENSG00000164463	CREBRF	2.92342	23.5322	0.00346211	0.0135801	0.0118212	23	29
ENSG00000078487	ZCWPW1	-2.91976	-2.89526	0.00350299	0.244553	4.11888e-30	22	42
ENSG00000145451	GLRA3	-2.9149	-154.501	0.003558	0.0120644	0.0176972	1	1
ENSG00000139436	GIT2	2.91483	10.7697	0.0035588	0.0110077	0.0235105	40	46
ENSG00000196235	SUPT5H	2.91355	11.182	0.00357345	0.0546958	3.29037e-07	2	2
ENSG00000093000	NUP50	-2.91034	-5.59037	0.00361036	0.0763994	1.28416e-09	37	49
ENSG00000108587	GOSR1	2.9087	2.42759	0.00362936	0.148028	6.86743e-18	11	13
ENSG00000110876	SELPLG	2.90744	166.732	0.003644	0.0140806	0.0103552	1	1
ENSG00000087116	ADAMTS2	-2.90622	-11.0832	0.0036583	0.0350851	4.72802e-05	2	2
ENSG00000162971	TYW5	-2.90607	-1.57215	0.00365999	0.117749	2.53298e-14	43	57
ENSG00000137845	ADAM10	2.90553	14.6653	0.00366627	0.0400811	1.33471e-05	13	13
ENSG00000114446	IFT57	-2.90503	-2.74859	0.00367212	0.137242	1.31894e-16	75	79
ENSG00000162139	NEU3	-2.90486	-6.18918	0.00367423	0.0277017	0.000308019	14	18
ENSG00000196268	ZNF493	2.90418	12.442	0.00368221	0.0251889	0.000584519	2	2
ENSG00000006194	ZNF263	-2.90089	-150.827	0.003721	0.0106541	0.0258699	1	1
ENSG00000185630	PBX1	-2.89987	-4.6912	0.00373323	0.0701566	6.38125e-09	15	16
ENSG00000110583	NAA40	-2.8991	-177.155	0.00374238	0.00950388	0.0353929	2	2
ENSG00000268156	NA	2.89908	181.696	0.00374257	0.0199925	0.00221721	2	2
ENSG00000059377	TBXAS1	2.89663	159.241	0.003772	0.0240318	0.000785674	1	1
ENSG00000256995	LINC02955	2.89596	158.888	0.00378	0.0166719	0.00524607	1	1
ENSG00000223599	ENSG00000223599	-2.89395	-262.553	0.00380427	0.0143883	0.00954761	3	3
ENSG00000001561	ENPP4	2.89385	6.86541	0.0038055	0.0821983	2.87678e-10	16	19
ENSG00000188732	FAM221A	-2.89311	-2.4251	0.00381443	0.242029	8.97436e-30	16	19
ENSG00000204248	COL11A2	2.89036	1.80248	0.00384802	0.0596452	9.34806e-08	43	74
ENSG00000188483	IER5L	2.89032	113.684	0.00384846	0.0245754	0.000683699	2	2
ENSG00000168096	ANKS3	2.88761	6.49605	0.00388179	0.046553	2.59377e-06	41	51
ENSG00000164308	ERAP2	2.88717	1.98551	0.00388723	0.734699	8.76225e-136	19	28
ENSG00000082515	MRPL22	-2.88394	-12.8551	0.00392734	0.021481	0.00151116	34	39
ENSG00000257704	INAFM1	-2.87932	-22.0497	0.00398536	0.00875305	0.0435248	7	8
ENSG00000128596	CCDC136	-2.87911	-171.094	0.003988	0.0300018	0.000171625	1	1
ENSG00000137274	BPHL	-2.8763	-3.16539	0.00402367	0.244946	3.64712e-30	39	46
ENSG00000142609	CFAP74	2.87613	7.84521	0.00402587	0.106616	4.87442e-13	11	16
ENSG00000100731	PCNX1	-2.87278	-2.99716	0.00406873	0.116329	3.69988e-14	30	37
ENSG00000255389	ENSG00000255389	2.87008	2.97487	0.00410367	0.61614	1.58887e-98	32	35
ENSG00000188559	RALGAPA2	2.86911	11.4122	0.00411632	0.0120757	0.0176438	5	6
ENSG00000197555	SIPA1L1	2.86475	177.414	0.00417333	0.022356	0.001207	2	2
ENSG00000236841	ENSG00000236841	2.86379	163.431	0.004186	0.0198738	0.00228616	1	1
ENSG00000204634	TBC1D8	-2.86356	-6.86509	0.0041891	0.0938518	1.39274e-11	13	15
ENSG00000116005	PCYOX1	-2.86338	-11.5614	0.00419145	0.0195961	0.00245613	18	20
ENSG00000182628	SKA2	2.86287	4.1052	0.00419824	0.138327	9.81333e-17	18	18
ENSG00000169299	PGM2	2.86137	6.15756	0.00421809	0.32815	5.44117e-42	8	14
ENSG00000236830	CBR3-AS1	2.8551	3.81268	0.00430231	0.116542	3.49529e-14	18	18
ENSG00000023228	NDUFS1	2.85485	5.36206	0.00430575	0.0915254	2.55527e-11	15	16
ENSG00000178449	COX14	2.85228	5.28077	0.00434075	0.0157418	0.00668992	15	16
ENSG00000116641	DOCK7	-2.84968	-15.7944	0.0043763	0.0209241	0.00174392	60	68
ENSG00000143933	CALM2	-2.84865	-184.503	0.00439057	0.012624	0.0152402	2	2
ENSG00000168243	GNG4	2.84588	10.232	0.00442889	0.039242	1.65049e-05	14	15
ENSG00000166435	XRRA1	-2.83794	-1.18786	0.00454053	0.763902	1.52809e-147	33	47
ENSG00000112214	FHL5	-2.83722	-5.93339	0.00455086	0.063988	3.09018e-08	29	33
ENSG00000080200	CRYBG3	2.83671	2.83832	0.00455805	0.251174	5.2734e-31	20	20
ENSG00000066629	EML1	2.83437	9.26116	0.00459163	0.0287072	0.000238495	10	10
ENSG00000099821	POLRMT	2.83432	16.8752	0.0045923	0.0474712	2.05555e-06	7	12
ENSG00000090316	MAEA	2.83313	33.3376	0.00460948	0.0202497	0.00207485	11	16
ENSG00000168803	ADAL	2.83167	4.13982	0.00463059	0.280071	5.41541e-35	19	20
ENSG00000147905	ZCCHC7	2.83107	2.29804	0.00463925	0.12248	7.13769e-15	23	27
ENSG00000043143	JADE2	-2.82561	-182.836	0.004719	0.0572179	1.73349e-07	1	1
ENSG00000172020	GAP43	2.82528	155.623	0.004724	0.00945022	0.0359176	1	1
ENSG00000261819	ENSG00000261819	-2.82459	-3.98557	0.00473408	0.108101	3.2919e-13	13	23
ENSG00000160179	ABCG1	-2.82408	-14.945	0.00474169	0.0142539	0.00989207	29	33
ENSG00000196236	XPNPEP3	2.82339	5.01445	0.00475189	0.0255047	0.000539239	11	12
ENSG00000177683	THAP5	-2.82276	-12.356	0.00476117	0.0259339	0.000483298	17	20
ENSG00000198746	GPATCH3	-2.81558	-21.701	0.0048689	0.0179786	0.00373383	29	36
ENSG00000140943	MBTPS1	2.81102	8.07391	0.00493842	0.0785283	7.42061e-10	23	25
ENSG00000014824	SLC30A9	2.8096	3.54443	0.00496038	0.149317	4.81246e-18	58	67
ENSG00000196132	MYT1	2.8094	11.3572	0.00496335	0.0249702	0.00061809	41	53
ENSG00000211456	SACM1L	-2.80878	-136.692	0.004973	0.0385872	1.94799e-05	1	1
ENSG00000175575	PAAF1	2.80481	4.41211	0.0050346	0.367683	3.99068e-48	3	6
ENSG00000140400	MAN2C1	-2.80322	-3.0388	0.00505944	0.15661	6.37841e-19	23	25
ENSG00000101608	MYL12A	2.80313	163.302	0.005061	0.0197246	0.00237594	1	2
ENSG00000119682	AREL1	2.80201	4.85366	0.0050786	0.110004	1.98878e-13	8	8
ENSG00000128595	CALU	2.80081	19.4874	0.0050974	0.0152554	0.00760008	5	6
ENSG00000136527	TRA2B	-2.80025	-13.1767	0.0051063	0.0392863	1.63212e-05	28	31
ENSG00000143318	CASQ1	2.79967	1.61559	0.00511548	0.563805	1.25342e-85	4	7
ENSG00000136383	ALPK3	-2.79931	-3.49496	0.00512117	0.140767	5.03936e-17	54	63
ENSG00000266753	NA	-2.798	-152.838	0.005142	0.0326412	8.7835e-05	1	1
ENSG00000269657	NA	2.79487	150.923	0.00519203	0.0187276	0.00307478	2	3
ENSG00000119927	GPAM	-2.7942	-19.156	0.00520282	0.0380349	2.2403e-05	22	27
ENSG00000260630	SNAI3-AS1	2.79226	4.62996	0.00523409	0.099434	3.23009e-12	15	17
ENSG00000178149	DALRD3	-2.79186	-11.8547	0.00524055	0.0141466	0.0101764	10	14
ENSG00000118420	UBE3D	-2.79102	-8.21914	0.00525427	0.0346641	5.26025e-05	9	13
ENSG00000166770	ZNF667-AS1	2.79006	21.8141	0.00526977	0.0614469	5.90777e-08	16	18
ENSG00000172292	CERS6	-2.78525	-8.2857	0.0053486	0.0472601	2.16846e-06	15	20
ENSG00000170509	HSD17B13	-2.78516	-1.55777	0.00535005	0.242388	8.03461e-30	46	58
ENSG00000257815	PRANCR	-2.78482	-2.70314	0.00535567	0.313756	7.60571e-40	20	20
ENSG00000183763	TRAIP	-2.78038	-21.1015	0.00542958	0.00926102	0.0378335	3	4
ENSG00000197465	GYPE	-2.77835	-5.64581	0.00546364	0.318084	1.74086e-40	28	40
ENSG00000162951	LRRTM1	-2.77791	-189.129	0.00547091	0.0181746	0.00354866	3	3
ENSG00000167967	E4F1	2.7753	1976.65	0.005515	0.0104092	0.0276471	1	2
ENSG00000163288	GABRB1	2.77455	8.2602	0.00552789	0.0352088	4.58224e-05	3	4
ENSG00000205726	ITSN1	2.77178	165.9	0.005575	0.022658	0.00111701	1	1
ENSG00000108379	WNT3	-2.77096	-3.06783	0.00558921	0.179524	1.00115e-21	14	17
ENSG00000173452	TMEM196	2.77085	5.93491	0.00559102	0.0281399	0.000275519	36	41
ENSG00000154274	C4orf19	-2.77077	-328.027	0.00559244	0.0147648	0.00864594	2	3
ENSG00000198858	R3HDM4	2.77053	18.6806	0.0055965	0.0244889	0.000698988	20	26
ENSG00000153560	UBP1	-2.76895	-14.4727	0.00562379	0.0168884	0.00495815	7	7
ENSG00000078098	FAP	2.7673	20.0883	0.00565228	0.0226672	0.00111437	22	32
ENSG00000144791	LIMD1	-2.76397	-5.54842	0.00571022	0.0717799	4.2088e-09	3	3
ENSG00000249087	ZNF436-AS1	2.76229	13.1232	0.00573971	0.027285	0.000342495	3	3
ENSG00000116698	SMG7	2.76143	452.72	0.00575488	0.0318172	0.000108252	2	3
ENSG00000165506	DNAAF2	2.75769	18.782	0.00582115	0.0135842	0.0118081	15	18
ENSG00000198478	SH3BGRL2	-2.75664	-3.86819	0.00583979	0.135371	2.19475e-16	21	27
ENSG00000172602	RND1	-2.74838	-217.042	0.005989	0.0132452	0.0129189	1	2
ENSG00000198093	ZNF649	2.74828	3.69126	0.00599091	0.117944	2.40437e-14	14	14
ENSG00000113851	CRBN	2.74694	4.04633	0.00601539	0.136086	1.80721e-16	23	30
ENSG00000177731	FLII	2.74681	163.099	0.00601781	0.020114	0.00214875	3	5
ENSG00000161551	ZNF577	2.74566	0.72601	0.00603888	0.480711	5.02851e-68	21	22
ENSG00000183060	LYSMD4	2.74554	3.72423	0.00604122	0.267317	3.25768e-33	12	13
ENSG00000196466	ZNF799	2.74452	146.938	0.00606	0.0219074	0.00135432	1	1
ENSG00000266918	ENSG00000266918	2.74122	23.5046	0.0061212	0.409352	5.1212e-55	27	31
ENSG00000107185	RGP1	-2.74082	-229.037	0.00612864	0.0103875	0.0278104	3	4
ENSG00000075624	ACTB	-2.7404	-4.92823	0.00613643	0.112987	9.00943e-14	33	42
ENSG00000124098	FAM210B	2.74033	9.60518	0.00613783	0.0571065	1.78324e-07	29	31
ENSG00000233280	NA	2.73969	2.99476	0.00614963	0.229353	4.32055e-28	28	31
ENSG00000065621	GSTO2	2.73858	1.95623	0.0061706	0.398586	3.42843e-53	15	17
ENSG00000182836	PLCXD3	2.73645	8.34316	0.00621057	0.0393963	1.5873e-05	53	60
ENSG00000253553	ENSG00000253553	2.73536	3.20294	0.00623113	0.0370853	2.84911e-05	16	17
ENSG00000250305	TRMT9B	-2.73364	-6.25955	0.00626389	0.0353981	4.36768e-05	12	13
ENSG00000189046	ALKBH2	-2.73121	-312.185	0.00631018	0.0251398	0.000591895	2	2
ENSG00000116396	KCNC4	2.72935	13.0486	0.006346	0.0316944	0.000111678	19	21
ENSG00000171051	FPR1	-2.72716	-16.9661	0.00638824	0.0240829	0.00077547	9	10
ENSG00000198133	TMEM229B	-2.72681	-177.202	0.006395	0.00855118	0.0460293	1	2
ENSG00000108932	SLC16A6	2.72392	165.517	0.00645127	0.0119108	0.0184405	2	2
ENSG00000159461	AMFR	2.72363	3.28167	0.00645685	0.12664	2.33222e-15	37	49
ENSG00000173402	DAG1	2.72344	166.714	0.00646064	0.0153873	0.00734143	4	4
ENSG00000148057	IDNK	-2.72002	-5.4149	0.00652776	0.0363297	3.4498e-05	46	47
ENSG00000164182	NDUFAF2	-2.71919	-12.9746	0.00654423	0.00999056	0.0309828	16	18
ENSG00000137573	SULF1	-2.71888	-10.9249	0.00655025	0.03245	9.21994e-05	38	39
ENSG00000184743	ATL3	2.71877	4.75032	0.00655242	0.0817735	3.21067e-10	21	22
ENSG00000182093	GET1	2.71468	9.68541	0.00663405	0.0247583	0.000652479	33	38
ENSG00000054654	SYNE2	2.71365	25.97	0.00665463	0.0307759	0.000140995	7	10
ENSG00000234224	TMEM229A	-2.71079	-7.62894	0.00671231	0.0831164	2.26861e-10	8	14
ENSG00000185070	FLRT2	2.70598	174.041	0.00681025	0.0195661	0.00247525	2	2
ENSG00000182263	FIGN	2.70541	172.689	0.006822	0.0281227	0.000276726	1	1
ENSG00000006634	DBF4	2.70492	27.2292	0.00683209	0.00911643	0.0393696	7	10
ENSG00000197256	KANK2	-2.70456	-7.48607	0.00683957	0.059036	1.0916e-07	9	9
ENSG00000140521	POLG	-2.69971	-9.41889	0.00694	0.01006	0.0304014	12	17
ENSG00000186439	TRDN	-2.69819	-5.7153	0.00697174	0.0866753	9.02039e-11	27	35
ENSG00000152413	HOMER1	-2.69399	-13.7039	0.00706013	0.0310358	0.000131995	18	21
ENSG00000163374	YY1AP1	-2.69345	-1.66487	0.00707159	0.473902	1.0401e-66	11	13
ENSG00000146233	CYP39A1	2.69128	32.6451	0.00711785	0.0240223	0.000787575	4	5
ENSG00000163013	FBXO41	-2.69109	-10.0471	0.00712184	0.0266191	0.000405831	12	14
ENSG00000234719	NPIPB2	-2.685	-1.73382	0.007253	0.349973	2.4823e-45	27	32
ENSG00000133059	DSTYK	2.68469	179.368	0.00725979	0.0117466	0.0192705	2	2
ENSG00000149761	NUDT22	2.68293	152.99	0.007298	0.0377059	2.43483e-05	1	1
ENSG00000156639	ZFAND3	2.67987	158.029	0.00736506	0.0274958	0.000324596	3	3
ENSG00000148339	SLC25A25	2.67901	185.081	0.007384	0.0109471	0.0238986	1	1
ENSG00000138182	KIF20B	2.67643	1.78552	0.00744109	0.164911	6.26905e-20	110	119
ENSG00000264885	NA	2.67637	20.4974	0.00744239	0.0215834	0.00147188	14	23
ENSG00000223522	ENSG00000223522	2.6762	204.01	0.00744627	0.0162185	0.00590554	2	2
ENSG00000079277	MKNK1	-2.6746	-7.52723	0.00748177	0.043211	6.04464e-06	6	9
ENSG00000172273	HINFP	-2.67454	-6.82728	0.00748324	0.0728105	3.23064e-09	29	33
ENSG00000269696	ZNF470-DT	-2.67408	-2.39381	0.00749347	0.31041	2.36334e-39	23	29
ENSG00000151067	CACNA1C	-2.67251	-71.9714	0.00752865	0.0093513	0.0369064	2	2
ENSG00000108582	CPD	-2.67125	-9.1254	0.00755702	0.0253304	0.00056378	14	20
ENSG00000186908	ZDHHC17	-2.67026	-20.7044	0.0075792	0.0183783	0.00336606	3	4
ENSG00000082516	GEMIN5	2.66987	153.06	0.007588	0.00865237	0.0447554	1	1
ENSG00000117245	KIF17	-2.66908	-2.78284	0.00760598	0.254653	1.77806e-31	17	18
ENSG00000183655	KLHL25	2.6667	142.16	0.00766	0.026248	0.000446093	1	1
ENSG00000179603	GRM8	2.66629	3.71867	0.00766926	0.154772	1.06326e-18	36	42
ENSG00000106683	LIMK1	-2.66585	-9.88531	0.00767943	0.0523759	5.92892e-07	4	5
ENSG00000156735	BAG4	2.66461	-0.851925	0.00770773	0.0136102	0.011727	23	28
ENSG00000259860	NA	-2.66417	-179.385	0.00771779	0.0315951	0.000114529	2	2
ENSG00000107882	SUFU	2.66347	8.99554	0.007734	0.00898246	0.040851	8	10
ENSG00000163428	LRRC58	-2.66334	-26.0399	0.00773682	0.00854706	0.046082	12	14
ENSG00000112110	MRPL18	2.663	7.02813	0.00774476	0.0343457	5.70217e-05	7	12
ENSG00000198408	OGA	-2.6588	-154.349	0.007842	0.0135445	0.0119331	1	1
ENSG00000188266	HYKK	-2.65705	-26.8048	0.00788273	0.00826668	0.0498191	17	22
ENSG00000120253	NUP43	2.6568	6.5781	0.0078886	0.0550249	3.02648e-07	34	39
ENSG00000179562	GCC1	2.65673	6.34024	0.00789028	0.0680381	1.09774e-08	7	9
ENSG00000124134	KCNS1	-2.65257	-2.56612	0.00798816	0.169797	1.58428e-20	19	21
ENSG00000139780	METTL21C	-2.65058	-3.00015	0.00803535	0.398506	3.536e-53	19	23
ENSG00000091542	ALKBH5	-2.65021	-2.86646	0.00804424	0.132317	5.02864e-16	36	42
ENSG00000146067	FAM193B	2.6499	5.59875	0.00805156	0.0451553	3.69509e-06	12	16
ENSG00000124214	STAU1	2.64984	11.3096	0.00805305	0.00825654	0.0499601	22	23
ENSG00000185065	UFD1-AS1	2.64961	5.60572	0.00805852	0.10135	1.95262e-12	14	17
ENSG00000073849	ST6GAL1	2.64801	7.50099	0.00809663	0.0674909	1.2627e-08	14	15
ENSG00000159199	ATP5MC1	2.64769	1.87312	0.00810446	0.0505493	9.42248e-07	19	26
ENSG00000197846	NA	2.64716	6.57875	0.00811717	0.0100879	0.0301713	27	30
ENSG00000053108	FSTL4	2.64694	210.752	0.00812244	0.0213259	0.00157264	2	2
ENSG00000100399	CHADL	-2.64633	-10.9016	0.00813713	0.0256635	0.000517817	2	2
ENSG00000260912	ENSG00000260912	2.64525	177.667	0.008163	0.0227595	0.00108831	1	1
ENSG00000127081	ZNF484	2.64361	2.22427	0.0082028	0.31434	6.23684e-40	16	21
ENSG00000125462	MIR9-1HG	2.64314	188.048	0.008214	0.0279962	0.000285776	1	1
ENSG00000165283	STOML2	-2.64202	-176.748	0.00824132	0.0238314	0.000826991	3	3
ENSG00000164306	PRIMPOL	-2.64182	-1.98975	0.00824626	0.410638	3.08396e-55	51	57
ENSG00000013441	CLK1	2.63823	163.087	0.008334	0.0314286	0.00011947	1	1
ENSG00000165379	LRFN5	-2.63721	-2.39104	0.00835907	0.553051	3.59812e-83	27	33
ENSG00000128604	IRF5	2.63712	12.3751	0.00836124	0.0292517	0.000207663	3	3
ENSG00000136449	MYCBPAP	2.63659	6.76637	0.00837437	0.113617	7.61941e-14	15	16
ENSG00000197724	PHF2	2.63644	146.865	0.008378	0.0154464	0.0072286	1	1
ENSG00000181830	SLC35C1	-2.63629	-15.7822	0.00838179	0.0153509	0.00741193	7	7
ENSG00000232013	NA	-2.6355	-6.81346	0.0084013	0.0548913	3.13097e-07	4	4
ENSG00000161996	WDR90	2.63489	237.68	0.00841635	0.0320343	0.000102451	2	3
ENSG00000243667	DNAAF10	2.62878	10.5295	0.0085693	0.0310502	0.000131513	14	16
ENSG00000119411	BSPRY	-2.62717	-2.10881	0.00860971	0.414981	5.51523e-56	25	28
ENSG00000219565	ZPR1P1	2.62541	2.40402	0.00865453	0.00970691	0.0334786	11	16
ENSG00000064726	BTBD1	2.62322	6.45988	0.00871043	0.0826202	2.57937e-10	15	17
ENSG00000141431	ASXL3	2.62265	169.019	0.008725	0.0126492	0.015138	1	1
ENSG00000166794	PPIB	-2.62202	-179.638	0.008741	0.0179398	0.00377169	1	2
ENSG00000078401	EDN1	2.62186	20.1432	0.00874516	0.0172518	0.00451038	26	32
ENSG00000181690	PLAG1	2.62179	167.766	0.008747	0.0140304	0.0104935	1	1
ENSG00000234745	HLA-B	2.62068	7.25786	0.00877553	0.183507	3.20314e-22	6	11
ENSG00000054967	RELT	-2.62022	-15.3619	0.00878742	0.0143456	0.00965563	12	14
ENSG00000009954	BAZ1B	2.62019	10934.9	0.008788	0.00934395	0.0369809	1	2
ENSG00000185933	CALHM1	-2.61944	-9.33506	0.00880731	0.0213237	0.00157354	12	13
ENSG00000105894	PTN	-2.61926	-10.1712	0.00881197	0.0119743	0.0181293	21	26
ENSG00000161298	ZNF382	2.61873	12.3119	0.00882579	0.0382169	2.13942e-05	11	12
ENSG00000087085	ACHE	2.61597	3.03677	0.00889751	0.0335945	6.89781e-05	19	27
ENSG00000126214	KLC1	2.61497	-0.567031	0.00892348	0.0336168	6.85891e-05	19	22
ENSG00000111052	LIN7A	-2.61392	-189.767	0.00895094	0.0573595	1.67215e-07	2	2
ENSG00000106460	TMEM106B	2.61361	146.959	0.008959	0.0166242	0.00531187	1	1
ENSG00000149485	FADS1	2.61235	4.03524	0.00899223	0.149151	5.03851e-18	9	11
ENSG00000133216	EPHB2	-2.61028	-152.61	0.00904681	0.0145104	0.0092452	2	2
ENSG00000143995	MEIS1	-2.60868	-3.87876	0.00908917	0.139743	6.6679e-17	59	62
ENSG00000171097	KYAT1	-2.60801	-155.832	0.009107	0.0270087	0.000367471	1	1
ENSG00000125877	ITPA	2.60353	2.43035	0.00922696	0.326222	1.06095e-41	19	21
ENSG00000253352	TUG1	-2.60297	-175.484	0.009242	0.0102035	0.029237	1	1
ENSG00000170049	KCNAB3	2.60195	9.28774	0.00926961	0.046916	2.36592e-06	3	5
ENSG00000164241	C5orf63	2.6014	7.87834	0.00928446	0.0819918	3.03455e-10	25	28
ENSG00000131408	NR1H2	2.60023	149.81	0.009316	0.0132174	0.0130145	1	2
ENSG00000260236	PTPN23-DT	2.59844	19.4272	0.00936494	0.00882408	0.0426778	4	5
ENSG00000168268	NT5DC2	-2.59504	-6.11164	0.00945807	0.0990212	3.59966e-12	10	12
ENSG00000124507	PACSIN1	-2.59215	-9.45313	0.00953791	0.00852006	0.0464287	14	14
ENSG00000237004	ZNRF2P1	-2.5921	-154.087	0.0095393	0.0207811	0.00180934	2	2
ENSG00000044459	CNTLN	-2.59203	-6.25567	0.00954109	0.108767	2.7596e-13	25	33
ENSG00000197157	SND1	2.59154	6.47908	0.0095548	0.0336649	6.7758e-05	16	19
ENSG00000092020	PPP2R3C	2.59148	2.07732	0.00955633	0.34112	5.79837e-44	13	15
ENSG00000122779	TRIM24	2.5909	7.45844	0.00957257	0.012051	0.0177609	28	33
ENSG00000137252	HCRTR2	-2.59088	-9.06421	0.00957312	0.0324311	9.26432e-05	9	16
ENSG00000084463	WBP11	2.59086	16.4596	0.00957357	0.0171129	0.00467645	23	31
ENSG00000101421	CHMP4B	2.58906	4.00217	0.00962387	0.166147	4.42971e-20	7	8
ENSG00000203814	H2BC18	-2.58873	-148.157	0.009633	0.0314206	0.000119714	1	1
ENSG00000174574	AKIRIN1	-2.58833	-20.489	0.00964429	0.0161846	0.00595798	7	7
ENSG00000260539	NA	2.58699	2.14142	0.0096819	0.145907	1.2313e-17	21	27
ENSG00000212978	C2orf74-DT	-2.58696	-3.9407	0.00968262	0.0338297	6.4986e-05	22	28
ENSG00000111445	RFC5	2.58435	116.2	0.00975621	0.0217445	0.00141222	5	5
ENSG00000088833	NSFL1C	-2.58103	-10.8593	0.00985057	0.0236141	0.000874292	8	8
ENSG00000188554	NBR1	2.57993	169.102	0.009882	0.0198822	0.0022812	1	1
ENSG00000164687	FABP5	2.57937	160.082	0.009898	0.0134165	0.012345	1	1
ENSG00000196923	PDLIM7	2.5782	10.2813	0.00993157	0.0203544	0.00201964	11	14
ENSG00000237298	TTN-AS1	2.57718	23.1683	0.00996087	0.0131947	0.0130935	16	18
ENSG00000110921	MVK	-2.5766	-7.16419	0.00997765	0.0200201	0.00220147	30	34
ENSG00000214211	CTAGE14P	2.57538	168.388	0.010013	0.0214251	0.00153304	2	2
ENSG00000123500	COL10A1	-2.57479	-156.982	0.01003	0.0217802	0.0013993	1	1
ENSG00000166263	STXBP4	-2.57439	-2.28262	0.0100416	0.285336	9.77498e-36	22	22
ENSG00000187323	DCC	-2.57438	-5.00903	0.0100419	0.0184305	0.00332084	19	21
ENSG00000141580	WDR45B	-2.57388	-6.75923	0.0100566	0.0373385	2.67219e-05	20	25
ENSG00000170180	GYPA	-2.57227	-7.28894	0.0101034	0.0705346	5.79211e-09	17	24
ENSG00000145908	ZNF300	-2.57167	-17.82	0.0101208	0.0199417	0.00224644	5	6
ENSG00000240809	CAP1P1	2.57077	6.72984	0.0101472	0.0331777	7.66652e-05	19	28
ENSG00000198691	ABCA4	2.56931	6.00565	0.0101902	0.0803499	4.6379e-10	28	32
ENSG00000072135	PTPN18	2.56762	179.841	0.01024	0.034729	5.17437e-05	1	1
ENSG00000115241	PPM1G	-2.56617	-12.4272	0.0102827	0.0257405	0.000507751	6	9
ENSG00000160209	PDXK	-2.56595	-11.8949	0.0102893	0.00937303	0.0366867	24	31
ENSG00000115159	GPD2	2.56559	176.919	0.0103	0.0137675	0.0112488	1	1
ENSG00000215196	BASP1-AS1	-2.56478	-3.68732	0.0103242	0.0361761	3.5866e-05	30	34
ENSG00000128915	ICE2	-2.56291	-146.606	0.01038	0.014723	0.00874166	1	1
ENSG00000186792	HYAL3	2.56272	2.08382	0.0103855	0.369127	2.34324e-48	11	15
ENSG00000156983	BRPF1	2.56145	27.6025	0.0104236	0.0119551	0.0182228	21	24
ENSG00000171928	TVP23B	2.56136	66.9885	0.0104265	0.0499043	1.10964e-06	3	10
ENSG00000172613	RAD9A	-2.55891	-166.685	0.0105	0.0230935	0.000999004	1	1
ENSG00000267136	ENSG00000267136	-2.55858	-156.527	0.01051	0.0339436	6.31372e-05	1	1
ENSG00000141198	TOM1L1	2.5579	20.9873	0.0105307	0.0111707	0.0224991	20	21
ENSG00000115946	PNO1	2.55409	7.63528	0.0106466	0.053372	4.60474e-07	15	16
ENSG00000137261	KIAA0319	2.55348	17.8262	0.0106653	0.0327521	8.54001e-05	11	15
ENSG00000186625	KATNA1	-2.54977	-17.3904	0.0107794	0.0376776	2.45235e-05	6	7
ENSG00000122986	HVCN1	2.54943	176.606	0.01079	0.0229225	0.00104377	1	1
ENSG00000183873	SCN5A	-2.54834	-20.0859	0.0108238	0.015155	0.00780304	4	4
ENSG00000103199	ZNF500	2.54704	6.05419	0.010864	0.066109	1.7978e-08	15	17
ENSG00000109576	AADAT	2.54581	5.38206	0.0109024	0.144158	1.99043e-17	11	12
ENSG00000143416	SELENBP1	2.54445	4.78146	0.0109451	0.0875895	7.11446e-11	18	20
ENSG00000241644	INMT	-2.54345	-171.364	0.0109763	0.0260786	0.000465793	2	2
ENSG00000139970	RTN1	-2.5408	-154.539	0.01106	0.0291623	0.000212435	1	1
ENSG00000166341	DCHS1	-2.53904	-5.38541	0.0111157	0.0997889	2.94279e-12	14	18
ENSG00000175175	PPM1E	2.53477	9.31035	0.0112521	0.0132718	0.0128281	10	11
ENSG00000128285	MCHR1	-2.53463	-2.36953	0.0112566	0.122083	7.94019e-15	17	18
ENSG00000139218	SCAF11	2.53352	174.382	0.0112925	0.0207867	0.00180672	2	2
ENSG00000138604	GLCE	-2.53335	-4.2734	0.0112979	0.120272	1.29024e-14	19	20
ENSG00000188215	DCUN1D3	-2.53286	-87.7268	0.0113137	0.0257645	0.000504653	4	6
ENSG00000223704	LINC01422	-2.53189	-8.43286	0.0113451	0.0203788	0.00200693	14	15
ENSG00000267111	NA	2.53143	138.671	0.01136	0.0137974	0.01116	1	2
ENSG00000126803	HSPA2	-2.5275	-16.1528	0.0114879	0.011835	0.0188189	19	22
ENSG00000108784	NAGLU	-2.52638	-18.3872	0.0115245	0.017458	0.00427475	13	18
ENSG00000091732	ZC3HC1	2.5221	145	0.0116657	0.0217523	0.00140937	2	2
ENSG00000143147	GPR161	2.52132	6.06882	0.0116916	0.17754	1.76291e-21	55	66
ENSG00000148225	WDR31	2.52097	10.1144	0.0117031	0.045002	3.84132e-06	6	6
ENSG00000151233	GXYLT1	2.52025	5.34122	0.011727	0.0836219	1.99043e-10	21	24
ENSG00000109519	GRPEL1	2.51944	5.18268	0.011754	0.0752757	1.71468e-09	6	8
ENSG00000182544	MFSD5	-2.51814	-2.63587	0.0117976	0.0116367	0.0198477	21	21
ENSG00000164600	NEUROD6	-2.51798	-263.209	0.0118031	0.0364162	3.37503e-05	2	2
ENSG00000261340	LINC01616	-2.51732	-9.99106	0.0118251	0.0415281	9.25448e-06	9	11
ENSG00000103494	RPGRIP1L	-2.5154	-3.68957	0.0118898	0.224334	1.9697e-27	7	10
ENSG00000085491	SLC25A24	2.51478	1.5172	0.0119105	0.420759	5.4768e-57	35	40
ENSG00000213694	S1PR3	-2.51328	-21.407	0.0119614	0.0173935	0.00434707	39	50
ENSG00000008277	ADAM22	-2.51299	-10.6753	0.0119713	0.0234005	0.000923443	13	14
ENSG00000136935	GOLGA1	-2.51228	-4.70647	0.0119952	0.0133859	0.0124455	42	54
ENSG00000173531	MST1	-2.51214	-154.17	0.012	0.0263448	0.000435224	1	1
ENSG00000261490	NA	-2.51182	-14.6321	0.012011	0.0131779	0.0131517	8	9
ENSG00000267724	ENSG00000267724	2.51015	12.7535	0.012068	0.0203378	0.0020283	32	42
ENSG00000179262	RAD23A	-2.51001	-120.513	0.0120727	0.0123136	0.0165564	2	2
ENSG00000197563	PIGN	2.50834	4.79013	0.0121301	0.160426	2.20161e-19	54	58
ENSG00000154736	ADAMTS5	2.50804	9.95851	0.0121404	0.051279	7.83082e-07	4	7
ENSG00000237188	ENSG00000237188	2.50718	4.67698	0.0121699	0.102695	1.37079e-12	8	8
ENSG00000143457	GOLPH3L	2.50661	2.77864	0.0121895	0.196647	7.18067e-24	77	80
ENSG00000140522	RLBP1	-2.50249	-3.15559	0.0123324	0.190396	4.40562e-23	47	54
ENSG00000011332	DPF1	2.50218	194.787	0.0123432	0.0165561	0.0054071	2	2
ENSG00000171720	HDAC3	2.5017	188.894	0.0123598	0.0229447	0.00103785	2	2
ENSG00000258754	LINC01579	2.5015	5.21774	0.0123668	0.0578949	1.4593e-07	4	4
ENSG00000181035	SLC25A42	-2.50068	-156.92	0.0123955	0.016319	0.00575243	2	2
ENSG00000153363	LINC00467	2.50017	10.3707	0.0124133	0.0841414	1.73989e-10	17	21
ENSG00000036257	CUL3	-2.49984	-12.855	0.0124249	0.0319327	0.000105126	13	16
ENSG00000129990	SYT5	-2.49963	-7.35377	0.0124322	0.13387	3.30031e-16	13	16
ENSG00000030582	GRN	2.49954	8.59508	0.0124355	0.0357608	3.98432e-05	5	5
ENSG00000104447	TRPS1	-2.49829	-8.6578	0.0124795	0.042051	8.10722e-06	5	6
ENSG00000196659	TTC30B	-2.49786	-215.898	0.0124945	0.0364013	3.38783e-05	3	3
ENSG00000196214	ZNF766	-2.49717	-840.375	0.012519	0.0227259	0.00109773	2	2
ENSG00000128881	TTBK2	-2.49657	-153.015	0.01254	0.0124539	0.0159477	1	1
ENSG00000135775	COG2	-2.4962	3.83919	0.0125531	0.0149187	0.00830293	48	55
ENSG00000128944	KNSTRN	-2.49584	-1.21913	0.0125658	0.699553	3.07399e-123	32	39
ENSG00000117713	ARID1A	2.49556	18.1605	0.0125757	0.0204189	0.00198631	23	25
ENSG00000162511	LAPTM5	-2.49527	-8.04532	0.0125862	0.026051	0.000469077	28	32
ENSG00000261737	NA	-2.49472	-6.35382	0.0126055	0.144086	2.03032e-17	38	45
ENSG00000197982	C1orf122	2.49432	160.232	0.01262	0.0194498	0.00255076	1	1
ENSG00000112343	TRIM38	-2.49263	-158.526	0.01268	0.0157948	0.00659778	1	1
ENSG00000261526	ENSG00000261526	-2.49089	-8.56321	0.0127424	0.00972719	0.0332933	12	14
ENSG00000142634	EFHD2	2.48772	50.058	0.0128564	0.0111352	0.0227157	4	5
ENSG00000165650	PDZD8	-2.48653	-349.128	0.0128996	0.0185608	0.00321051	2	2
ENSG00000178028	DMAP1	-2.47936	-5.6137	0.0131619	0.0599249	8.70561e-08	14	14
ENSG00000052723	SIKE1	2.47919	19.9612	0.0131682	0.0119959	0.018025	18	23
ENSG00000162426	SLC45A1	2.47865	7.92017	0.0131882	0.112147	1.12619e-13	20	25
ENSG00000123360	PDE1B	2.47829	9.25807	0.0132013	0.0548917	3.13062e-07	43	49
ENSG00000147576	ADHFE1	-2.47346	-3.40118	0.0133813	0.162034	1.40453e-19	24	25
ENSG00000174485	DENND4A	-2.47335	-7.72018	0.0133852	0.0367566	3.09633e-05	15	19
ENSG00000102595	UGGT2	-2.47283	-8.61752	0.0134047	0.111227	1.43759e-13	78	84
ENSG00000162931	TRIM17	2.4717	237.641	0.0134473	0.0256882	0.000514568	2	2
ENSG00000138463	SLC49A4	-2.47136	-150.919	0.01346	0.0390655	1.72592e-05	1	1
ENSG00000167740	CYB5D2	-2.47094	-17.6825	0.0134757	0.0278753	0.000294709	8	11
ENSG00000001460	STPG1	2.47062	6.94288	0.0134878	0.113622	7.60988e-14	8	11
ENSG00000184304	PRKD1	2.46898	139.1	0.01355	0.00996777	0.031176	1	1
ENSG00000145692	BHMT	2.46757	2.31399	0.0136033	0.32978	3.08935e-42	38	40
ENSG00000142149	HUNK	2.46627	1434	0.0136528	0.0189918	0.00287151	2	4
ENSG00000106991	ENG	2.46462	8.5789	0.013716	0.0208949	0.0017571	21	27
ENSG00000258485	SRMP2	2.46353	184.702	0.0137578	0.0220018	0.00132188	2	2
ENSG00000166965	RCCD1	-2.4622	-2.02281	0.0138089	0.238019	3.07782e-29	32	34
ENSG00000101210	EEF1A2	2.46108	12.0381	0.013852	0.021425	0.00153308	14	17
ENSG00000135334	AKIRIN2	2.46086	17.9809	0.0138606	0.0106373	0.0259884	23	28
ENSG00000169330	MINAR1	2.46079	9.34751	0.0138631	0.0368918	2.99211e-05	10	11
ENSG00000178802	MPI	-2.46032	-8.12369	0.0138812	0.0821261	2.93094e-10	17	20
ENSG00000237484	LINC01684	2.45799	26.3645	0.0139719	0.0113606	0.0213771	2	3
ENSG00000109270	LAMTOR3	2.45529	3.01029	0.0140771	0.285265	1.00028e-35	14	16
ENSG00000163636	PSMD6	2.45292	157.782	0.01417	0.0371323	2.8154e-05	1	1
ENSG00000254122	PCDHGB7	-2.45136	-12.2897	0.0142316	0.0118217	0.0188861	16	22
ENSG00000185730	ZNF696	2.44957	2.82224	0.0143025	0.0172754	0.00448269	22	26
ENSG00000131023	LATS1	-2.44938	-10.8441	0.0143101	0.0775223	9.6169e-10	8	11
ENSG00000171827	ZNF570	2.44806	233.09	0.0143629	0.0116915	0.0195576	3	3
ENSG00000126106	TMEM53	2.44479	7.33489	0.0144935	0.0130858	0.0134775	28	29
ENSG00000132872	SYT4	-2.44423	-19.5947	0.0145161	0.00894197	0.0413101	2	3
ENSG00000167264	DUS2	-2.44379	-6.16969	0.0145339	0.0464998	2.62891e-06	4	5
ENSG00000087995	METTL2A	2.44361	20.8753	0.0145411	0.0100198	0.0307366	19	27
ENSG00000138380	CARF	2.44026	6.63581	0.0146767	0.105827	6.00302e-13	32	35
ENSG00000242220	TCP10L	2.43438	6.79275	0.0149173	0.0438829	5.09929e-06	20	24
ENSG00000137871	ZNF280D	2.43353	189.486	0.0149522	0.0260576	0.000468294	2	2
ENSG00000168569	TMEM223	2.43196	3.3076	0.0150173	0.112943	9.11498e-14	28	34
ENSG00000100372	SLC25A17	-2.43071	-11.4448	0.0150694	0.0127708	0.0146555	11	13
ENSG00000152409	JMY	-2.43069	-10.6171	0.0150699	0.0463644	2.72065e-06	6	7
ENSG00000147955	SIGMAR1	-2.42997	-79.7765	0.0151	0.0106061	0.0262086	1	1
ENSG00000169783	LINGO1	2.42956	8.84478	0.015117	0.0406978	1.14183e-05	13	17
ENSG00000105483	CARD8	2.42889	4.16051	0.015145	0.279824	5.86738e-35	42	58
ENSG00000140015	KCNH5	-2.42633	-8.26922	0.0152523	0.0501053	1.05451e-06	35	36
ENSG00000141140	NA	-2.42214	-1.93209	0.0154294	0.194951	1.17618e-23	12	15
ENSG00000164104	HMGB2	-2.42019	-147.652	0.0155123	0.027228	0.000347504	2	2
ENSG00000154310	TNIK	2.41937	16.383	0.0155476	0.0293948	0.000200242	3	4
ENSG00000213160	KLHL23	2.41868	4.6988	0.0155771	0.118647	1.99262e-14	30	40
ENSG00000170854	RIOX2	2.41851	6.15821	0.0155842	0.0411779	1.0112e-05	19	19
ENSG00000172159	FRMD3	2.41825	185.11	0.0155952	0.0394835	1.55265e-05	5	6
ENSG00000251396	LINC01301	2.41732	5.50064	0.0156352	0.109494	2.27651e-13	31	36
ENSG00000099940	SNAP29	2.41684	0.730943	0.0156557	0.350814	1.83592e-45	82	88
ENSG00000196531	NACA	-2.41396	-178.36	0.01578	0.013926	0.0107869	1	1
ENSG00000199916	NA	2.41359	207.079	0.0157963	0.0156039	0.00693607	2	2
ENSG00000166262	FAM227B	-2.41258	-13.947	0.01584	0.0789505	6.65514e-10	13	17
ENSG00000267216	ENSG00000267216	2.41065	12.2903	0.0159242	0.0459681	3.0078e-06	6	7
ENSG00000213928	IRF9	-2.40927	-300.135	0.0159846	0.0328202	8.3938e-05	4	5
ENSG00000165752	STK32C	2.40917	14.9987	0.015989	0.0576797	1.54141e-07	16	18
ENSG00000126500	FLRT1	2.40772	171.417	0.0160524	0.0135557	0.0118977	2	2
ENSG00000186654	PRR5	2.40736	24.177	0.0160683	0.00886897	0.0421515	9	10
ENSG00000161791	FMNL3	2.4065	8.4081	0.0161061	0.0278816	0.000294238	8	9
ENSG00000124529	NA	-2.40635	-5.26541	0.0161126	0.0774016	9.92074e-10	19	21
ENSG00000003987	MTMR7	2.40625	1.50144	0.0161173	0.481327	3.81627e-68	16	19
ENSG00000261079	ENSG00000261079	2.40484	2.92872	0.0161796	0.0802724	4.73161e-10	24	36
ENSG00000040199	PHLPP2	-2.40394	-9.68478	0.0162196	0.0199248	0.0022563	7	9
ENSG00000136213	CHST12	-2.40337	0.271323	0.0162446	0.0273511	0.000336784	3	3
ENSG00000161647	MPP3	-2.40325	-158.308	0.01625	0.0113959	0.0211749	1	1
ENSG00000225302	NA	2.4028	158.29	0.01627	0.0254028	0.000553445	1	1
ENSG00000231233	CFAP58-DT	-2.40216	-10.9566	0.0162986	0.0378328	2.3579e-05	28	35
ENSG00000103671	TRIP4	2.40073	9.49372	0.0163623	0.050051	1.06912e-06	14	17
ENSG00000139200	PIANP	2.40062	9.93984	0.0163674	0.0206226	0.00188475	33	39
ENSG00000163938	GNL3	2.39959	5.87639	0.0164133	0.04926	1.30649e-06	17	19
ENSG00000252481	SCARNA13	2.39917	3.87428	0.0164321	0.143738	2.23355e-17	18	19
ENSG00000006283	CACNA1G	2.39913	11.4079	0.0164342	0.0113232	0.0215934	20	27
ENSG00000254245	PCDHGA3	-2.39829	-11.8326	0.016472	0.0230602	0.00100757	9	11
ENSG00000261716	H2BC20P	2.39707	176.85	0.0165269	0.0679807	1.11399e-08	2	3
ENSG00000240764	PCDHGC5	2.39678	145.76	0.01654	0.0237323	0.000848255	1	1
ENSG00000173852	DPY19L1	-2.3961	-4.88732	0.0165706	0.0784809	7.5117e-10	21	25
ENSG00000105048	TNNT1	-2.39546	2.69462	0.0165995	0.055696	2.55213e-07	17	30
ENSG00000160953	PWWP3A	2.39442	3.70118	0.0166468	0.222787	3.13757e-27	28	33
ENSG00000173621	LRFN4	2.39352	180.987	0.0166874	0.0129796	0.0138636	2	3
ENSG00000260432	NA	2.39325	389.414	0.0167	0.0116017	0.0200349	1	1
ENSG00000153048	CARHSP1	2.39288	12.383	0.0167167	0.029685	0.000186006	32	36
ENSG00000257060	ENSG00000257060	2.39229	5.29246	0.0167434	0.0972893	5.66796e-12	16	17
ENSG00000115239	ASB3	2.39225	2.03261	0.0167454	0.0288781	0.000228352	23	24
ENSG00000065978	YBX1	2.39215	170.496	0.01675	0.0217007	0.0014282	1	1
ENSG00000228223	HCG11	2.39144	4.87468	0.0167826	0.0230015	0.00102286	10	14
ENSG00000088812	ATRN	2.39059	15.2657	0.0168212	0.0153626	0.0073892	3	4
ENSG00000132394	EEFSEC	2.38703	5.93915	0.0169852	0.0294314	0.000198389	59	59
ENSG00000145911	N4BP3	2.38694	14.2544	0.0169893	0.0274542	0.000328056	5	7
ENSG00000114315	HES1	2.38607	235.777	0.0170293	0.0142884	0.00980242	3	4
ENSG00000253719	ATXN7L3B	-2.38601	-27.4272	0.0170322	0.0161566	0.00600188	4	4
ENSG00000135596	MICAL1	2.38572	3.6646	0.0170458	0.14462	1.75366e-17	9	11
ENSG00000175229	GAL3ST3	-2.3852	-408.023	0.01707	0.0195395	0.00249233	1	2
ENSG00000170653	ATF7	-2.3827	-355.595	0.0171863	0.0281978	0.000271486	3	3
ENSG00000151779	NBAS	2.38143	4.32543	0.0172456	0.103814	1.02101e-12	17	17
ENSG00000245498	MSANTD2-AS1	-2.38024	-2.3431	0.0173011	0.38552	5.10295e-51	21	25
ENSG00000188596	CFAP54	2.38005	4.99675	0.0173102	0.11509	5.14754e-14	16	16
ENSG00000163710	PCOLCE2	-2.37967	-4.99555	0.0173282	0.124128	4.58566e-15	25	27
ENSG00000115421	PAPOLG	-2.37878	-164.205	0.01737	0.0208142	0.00179399	1	1
ENSG00000173480	ZNF417	2.37676	12.2302	0.0174653	0.0551956	2.89809e-07	43	56
ENSG00000142920	AZIN2	-2.37642	-16.6619	0.0174817	0.0250916	0.000599221	16	18
ENSG00000262944	NA	2.37526	6.77166	0.0175367	0.0859774	1.0811e-10	3	5
ENSG00000166170	BAG5	-2.37223	-17.2034	0.0176813	0.0119558	0.0182196	14	17
ENSG00000122025	FLT3	-2.37203	-2.27934	0.0176904	0.309702	3.00222e-39	35	40
ENSG00000196655	TRAPPC4	-2.37094	-2.52298	0.0177431	0.304785	1.57033e-38	28	33
ENSG00000180098	TRNAU1AP	2.37052	19.5856	0.0177631	0.0361973	3.56742e-05	5	7
ENSG00000138399	FASTKD1	2.3658	13.7657	0.0179909	0.0259152	0.000485614	8	9
ENSG00000158711	ELK4	2.36275	353.768	0.0181398	0.0239784	0.000796477	2	2
ENSG00000064763	FAR2	-2.36221	-12.2544	0.0181661	0.0179697	0.0037425	6	6
ENSG00000074803	SLC12A1	-2.36202	-161.381	0.0181758	0.0358528	3.89255e-05	4	4
ENSG00000159314	ARHGAP27	2.36158	65.7166	0.018197	0.0164654	0.00553659	2	3
ENSG00000115361	ACADL	-2.36082	-210.361	0.0182347	0.0250513	0.000605426	2	2
ENSG00000100916	BRMS1L	2.3585	15.1222	0.0183488	0.0140661	0.010395	16	19
ENSG00000166340	TPP1	-2.35672	-8.36747	0.018437	0.0429247	6.49894e-06	4	4
ENSG00000110801	PSMD9	-2.35586	-180.365	0.01848	0.0394462	1.56737e-05	1	1
ENSG00000109572	CLCN3	-2.35578	-3.67478	0.0184839	0.03235	9.45669e-05	8	8
ENSG00000135535	CD164	2.35347	3.05129	0.018599	0.0800413	5.02254e-10	14	14
ENSG00000171533	MAP6	2.35245	145.53	0.01865	0.0114126	0.0210802	1	1
ENSG00000067715	SYT1	-2.35241	-10.429	0.0186522	0.0194762	0.00253342	14	17
ENSG00000099284	MACROH2A2	2.35186	179.603	0.01868	0.0177634	0.00394852	1	1
ENSG00000122299	ZC3H7A	2.35111	15.7922	0.0187175	0.010522	0.026813	32	36
ENSG00000149781	FERMT3	-2.35101	-13.4677	0.0187223	0.0284628	0.000253786	17	18
ENSG00000112139	MDGA1	2.35033	14.2602	0.0187567	0.0151596	0.00779355	28	31
ENSG00000178974	FBXO34	2.34975	4.77086	0.0187858	0.100199	2.64257e-12	17	20
ENSG00000073711	PPP2R3A	-2.34971	-7.24259	0.0187883	0.0284456	0.000254901	21	27
ENSG00000144837	PLA1A	2.34915	165.923	0.0188165	0.0354385	4.32328e-05	2	2
ENSG00000107862	GBF1	2.34908	186.204	0.01882	0.0226157	0.00112919	1	1
ENSG00000107960	STN1	-2.34842	-10.8836	0.0188534	0.0554015	2.75041e-07	17	18
ENSG00000142599	RERE	-2.34665	-3032.69	0.0189429	0.0179255	0.00378572	2	3
ENSG00000177842	ZNF620	-2.34631	-145.314	0.0189602	0.0189479	0.00290432	2	2
ENSG00000140983	RHOT2	-2.34602	-11.5596	0.0189752	0.0181743	0.00354898	8	8
ENSG00000106804	C5	-2.34426	-6.52423	0.0190647	0.0636184	3.3958e-08	8	8
ENSG00000185532	PRKG1	2.34361	2.70364	0.0190983	0.266749	3.90403e-33	26	29
ENSG00000165566	AMER2	2.34338	182.14	0.01911	0.0590231	1.09518e-07	1	2
ENSG00000177830	CHID1	2.34321	14.2461	0.0191185	0.0135725	0.0118449	15	20
ENSG00000125851	PCSK2	2.34241	131.027	0.0191598	0.0198289	0.00231284	4	4
ENSG00000116852	KIF21B	-2.34141	-1.29659	0.0192112	0.130312	8.65458e-16	22	23
ENSG00000116120	FARSB	-2.34	-7.33485	0.0192839	0.0458521	3.09748e-06	10	10
ENSG00000137054	POLR1E	-2.33923	-7.1367	0.0193237	0.0323752	9.39659e-05	13	14
ENSG00000104093	DMXL2	2.3391	94.5572	0.01933	0.00863378	0.0449867	1	4
ENSG00000158683	PKD1L1	2.33876	2.32934	0.0193478	0.253715	2.38509e-31	20	30
ENSG00000189184	PCDH18	2.33799	203.347	0.0193877	0.0459507	3.02112e-06	3	3
ENSG00000198218	QRICH1	-2.33777	-6.47741	0.0193992	0.0561012	2.30245e-07	11	13
ENSG00000144504	ANKMY1	2.33695	11.5746	0.0194417	0.0153809	0.00735375	15	18
ENSG00000163827	LRRC2	2.33655	2.50429	0.0194624	0.362486	2.68445e-47	14	14
ENSG00000122643	NT5C3A	2.33254	17.013	0.0196725	0.0128487	0.014355	5	8
ENSG00000177084	POLE	2.3325	1.0011	0.0196746	0.594068	6.94998e-93	34	35
ENSG00000239899	RN7SL674P	-2.33218	-256.658	0.0196913	0.0271682	0.000352845	3	3
ENSG00000080345	RIF1	2.33098	7.69261	0.0197543	0.0614094	5.96456e-08	9	10
ENSG00000132436	FIGNL1	-2.3308	-2.71411	0.0197637	0.424733	1.10359e-57	34	44
ENSG00000261428	NA	-2.33039	-2.20111	0.0197854	0.34609	9.93793e-45	6	6
ENSG00000183828	NUDT14	-2.33005	-3.56053	0.0198033	0.155381	8.97758e-19	14	16
ENSG00000125459	MSTO1	2.32979	-12.8356	0.0198171	0.0179143	0.00379675	3	3
ENSG00000074527	NTN4	-2.32969	-4.71469	0.0198227	0.206263	4.29257e-25	52	56
ENSG00000159231	CBR3	2.32934	1.86236	0.019841	0.239764	1.80173e-29	13	14
ENSG00000196169	KIF19	2.32921	24.8887	0.0198479	0.0190377	0.00283755	31	34
ENSG00000133265	HSPBP1	2.32672	72.8712	0.01998	0.0139982	0.0105831	1	1
ENSG00000136807	CDK9	-2.3267	-5.18903	0.019981	0.0816554	3.31022e-10	7	7
ENSG00000128524	ATP6V1F	2.32504	156.294	0.02007	0.0158109	0.00657006	1	1
ENSG00000136274	NACAD	-2.32481	-9.56729	0.020082	0.0422265	7.75504e-06	12	18
ENSG00000118976	OTUD4P1	2.32466	15.0364	0.0200904	0.0160751	0.00613113	8	8
ENSG00000154945	ANKRD40	2.32452	5.68745	0.0200974	0.0744304	2.13096e-09	13	14
ENSG00000149256	TENM4	-2.3244	-9.40548	0.0201042	0.037189	2.77527e-05	6	6
ENSG00000232110	ENSG00000232110	2.32424	4.99006	0.0201127	0.0929943	1.74214e-11	27	30
ENSG00000112981	NME5	2.32374	0.696502	0.0201394	0.308931	3.89442e-39	68	87
ENSG00000231770	TMEM44-AS1	-2.32321	-5.17255	0.0201677	0.140212	5.86627e-17	43	47
ENSG00000162521	RBBP4	2.3226	175.278	0.0202007	0.0143884	0.00954723	2	2
ENSG00000156958	GALK2	2.32131	158.038	0.02027	0.0147413	0.00869957	1	1
ENSG00000197312	DDI2	2.31876	13.6893	0.0204082	0.0625256	4.48745e-08	14	19
ENSG00000227500	SCAMP4	2.316	147.786	0.0205582	0.0141114	0.0102711	2	2
ENSG00000248383	PCDHAC1	-2.3157	-402.982	0.0205748	0.0233719	0.000930243	2	3
ENSG00000144401	METTL21A	-2.31568	-3.95786	0.0205759	0.144693	1.71856e-17	28	30
ENSG00000204525	HLA-C	2.31273	11.6262	0.0207376	0.659912	9.71306e-111	4	10
ENSG00000198822	GRM3	-2.31252	-17.7221	0.020749	0.00998773	0.0310066	12	14
ENSG00000187672	ERC2	2.31153	6.32263	0.0208036	0.0108163	0.0247588	34	39
ENSG00000170571	EMB	2.31129	1.62433	0.0208169	0.255483	1.37084e-31	22	28
ENSG00000176386	CDC26	2.31123	138.602	0.02082	0.0254334	0.000549143	1	1
ENSG00000108591	DRG2	-2.31024	-3.18467	0.0208748	0.0870464	8.19212e-11	32	38
ENSG00000165029	ABCA1	-2.30908	-14.4396	0.0209389	0.0088209	0.0427153	20	22
ENSG00000121766	ZCCHC17	-2.3074	-166.548	0.0210324	0.0106988	0.0255588	2	2
ENSG00000119522	DENND1A	-2.3068	-8.87742	0.0210662	0.0329218	8.18038e-05	11	16
ENSG00000231205	ZNF826P	-2.30626	-30.3453	0.0210961	0.051899	6.69149e-07	3	5
ENSG00000125657	TNFSF9	2.30444	14.0715	0.0211979	0.0130515	0.013601	12	13
ENSG00000158458	NRG2	2.30418	5.85195	0.0212124	0.0283509	0.000261113	24	30
ENSG00000143119	CD53	-2.3005	-3.88316	0.02142	0.196649	7.17662e-24	10	13
ENSG00000251143	ENSG00000251143	-2.30015	-158.489	0.02144	0.0207589	0.00181974	1	1
ENSG00000125449	ARMC7	-2.29901	-4.24836	0.0215043	0.123569	5.32881e-15	22	22
ENSG00000197016	ZNF470	-2.29518	-2.12101	0.0217229	0.248526	1.20237e-30	18	19
ENSG00000226017	PRICKLE2-AS3	-2.29436	-159.374	0.02177	0.0234277	0.000917046	1	1
ENSG00000119397	CNTRL	2.29414	11.6384	0.0217824	0.0356658	4.08139e-05	28	29
ENSG00000150636	CCDC102B	2.29088	3.2451	0.0219701	0.0176672	0.00404844	8	9
ENSG00000101290	CDS2	-2.29076	-4.1158	0.0219772	0.153949	1.33598e-18	38	42
ENSG00000241058	NSUN6	-2.28962	-5.20674	0.0220436	0.089807	3.99738e-11	24	27
ENSG00000068976	PYGM	-2.28933	-6.28116	0.0220605	0.0574963	1.61498e-07	30	34
ENSG00000233930	KRTAP5-AS1	2.28885	1.83968	0.0220878	0.537887	8.39065e-80	10	11
ENSG00000124074	ENKD1	-2.28847	-181.372	0.02211	0.0129022	0.0141519	1	1
ENSG00000189283	FHIT	-2.28796	-153.397	0.02214	0.0298022	0.000180553	1	1
ENSG00000184840	TMED9	-2.28744	-144.132	0.02217	0.0108291	0.0246733	1	1
ENSG00000184402	SS18L1	-2.28727	-143.378	0.02218	0.029198	0.000210515	1	1
ENSG00000163798	SLC4A1AP	-2.28608	-3.32769	0.0222498	0.117095	3.0162e-14	14	14
ENSG00000040341	STAU2	-2.28497	-124.051	0.0223146	0.0206061	0.00189279	4	4
ENSG00000127364	TAS2R4	2.28471	318.21	0.02233	0.0261015	0.000463073	1	2
ENSG00000186153	WWOX	2.28382	4.05429	0.0223822	0.153889	1.35839e-18	34	42
ENSG00000175595	ERCC4	-2.28364	-3.13847	0.0223928	0.180254	8.12769e-22	11	11
ENSG00000095539	SEMA4G	-2.2815	-163.326	0.0225186	0.0205357	0.00192743	2	2
ENSG00000197006	METTL9	-2.2803	-210.185	0.02259	0.00833032	0.0489438	1	2
ENSG00000116525	TRIM62	2.27878	171.144	0.02268	0.0192694	0.0026725	1	1
ENSG00000084623	EIF3I	2.27821	394.837	0.0227138	0.0438921	5.08746e-06	3	3
ENSG00000188211	NCR3LG1	-2.27803	-20.5208	0.0227249	0.0216622	0.00144238	5	7
ENSG00000112406	HECA	-2.27761	-162.534	0.02275	0.0128788	0.0142404	1	1
ENSG00000173258	ZNF483	-2.27605	-13.4055	0.0228427	0.0148396	0.00847754	7	7
ENSG00000229689	ANKRD33BP1	-2.27463	-5.67435	0.0229284	0.106781	4.66595e-13	14	19
ENSG00000162733	DDR2	-2.27426	-1.90547	0.0229503	0.0184655	0.00329081	43	49
ENSG00000218227	ENSG00000218227	2.27228	17.6247	0.0230697	0.150893	3.11396e-18	20	28
ENSG00000196456	ZNF775	2.27194	143.916	0.02309	0.0539871	3.93908e-07	1	1
ENSG00000128590	DNAJB9	-2.27179	-9.56584	0.0230994	0.0194572	0.00254587	8	11
ENSG00000167103	PIP5KL1	2.27144	8.59015	0.0231202	0.0497396	1.15693e-06	9	10
ENSG00000143248	RGS5	-2.2712	-49.6894	0.0231351	0.0117656	0.0191724	2	2
ENSG00000090104	RGS1	2.26996	160.6	0.02321	0.0160129	0.00623166	1	1
ENSG00000141994	DUS3L	2.26903	2.83857	0.0232664	0.1913	3.39158e-23	20	21
ENSG00000243335	KCTD7	2.26891	194.965	0.0232737	0.0451871	3.6655e-06	2	2
ENSG00000096717	SIRT1	-2.26881	-158.574	0.02328	0.0286585	0.000241467	1	1
ENSG00000167113	COQ4	2.26848	3775.3	0.0233	0.013571	0.0118496	1	2
ENSG00000117505	DR1	2.26825	3.05176	0.0233138	0.183801	2.944e-22	24	26
ENSG00000111879	FAM184A	2.26674	2.53386	0.0234059	0.270825	1.06314e-33	39	51
ENSG00000158773	USF1	2.26514	21.8611	0.0235043	0.0283352	0.000262162	20	28
ENSG00000083093	PALB2	2.26418	36.2245	0.0235631	0.0118929	0.0185294	7	8
ENSG00000233783	ENSG00000233783	2.26374	251.469	0.02359	0.0193964	0.00258621	2	3
ENSG00000160216	AGPAT3	-2.26325	-5.32631	0.0236203	0.0644397	2.75366e-08	17	17
ENSG00000248309	MEF2C-AS1	-2.26313	-143.15	0.0236276	0.00867041	0.0445324	2	2
ENSG00000132481	TRIM47	2.26179	3.24525	0.0237103	0.179048	1.14675e-21	10	10
ENSG00000171316	CHD7	2.26107	197.26	0.0237551	0.0121869	0.0171269	3	3
ENSG00000142694	EVA1B	-2.2605	-183.074	0.02379	0.0293883	0.000200577	1	1
ENSG00000182247	UBE2E2	2.25986	170.75	0.02383	0.0101744	0.0294689	1	1
ENSG00000260917	ENSG00000260917	-2.25818	-164.293	0.0239347	0.0201881	0.00210808	3	3
ENSG00000163596	ICA1L	2.25779	6.14388	0.0239585	0.0829152	2.38988e-10	13	16
ENSG00000178882	RFLNA	2.25705	10.7046	0.024005	0.0120919	0.0175676	24	27
ENSG00000169683	LRRC45	-2.25592	-6.42008	0.0240757	0.0866083	9.17873e-11	5	8
ENSG00000075035	WSCD2	2.25484	4.30552	0.0241436	0.110536	1.72679e-13	8	11
ENSG00000071127	WDR1	-2.25462	-11.3349	0.0241574	0.0311001	0.000129856	15	22
ENSG00000163749	CCDC158	2.25398	0.892315	0.0241972	0.249705	8.33369e-31	17	19
ENSG00000083312	TNPO1	2.25379	27.5285	0.0242092	0.00879472	0.0430258	2	2
ENSG00000169733	RFNG	2.25272	6.51589	0.0242768	0.0458602	3.09111e-06	32	39
ENSG00000078795	PKD2L2	-2.25235	-12.7384	0.0243002	0.0133573	0.0125402	12	14
ENSG00000178252	WDR6	2.25226	2.02929	0.0243056	0.243224	6.2081e-30	37	38
ENSG00000144867	SRPRB	2.25193	12.4038	0.0243269	0.0126939	0.014959	19	24
ENSG00000072364	AFF4	-2.2514	-161.273	0.02436	0.0140997	0.0103031	1	1
ENSG00000153896	ZNF599	-2.24843	-201.252	0.0245491	0.01563	0.00688874	2	2
ENSG00000181004	BBS12	-2.24818	-8.9988	0.0245646	0.0350838	4.72961e-05	6	7
ENSG00000050393	MCUR1	2.24762	7.00239	0.0246006	0.0590059	1.10001e-07	4	4
ENSG00000041353	RAB27B	2.24712	136.085	0.0246322	0.0140353	0.0104797	2	2
ENSG00000138785	INTS12	2.24649	18.2686	0.024673	0.0388685	1.81416e-05	12	14
ENSG00000260077	ENSG00000260077	2.24604	14.3596	0.0247014	0.0477541	1.91341e-06	8	11
ENSG00000189157	FAM47E	2.2458	2.43171	0.0247171	0.469995	5.81276e-66	57	69
ENSG00000235831	BHLHE40-AS1	-2.24489	-10.301	0.0247751	0.0265249	0.000415686	6	9
ENSG00000083845	RPS5	2.2441	5.83802	0.0248259	0.0732804	2.86349e-09	8	8
ENSG00000116141	MARK1	-2.24359	-7.893	0.0248589	0.0390469	1.73405e-05	17	19
ENSG00000008952	SEC62	-2.24345	-229.176	0.0248681	0.0171128	0.00467653	4	4
ENSG00000010361	FUZ	2.2428	2.90315	0.0249095	0.063832	3.21568e-08	27	37
ENSG00000197136	PCNX3	-2.24233	-164.028	0.02494	0.00833727	0.0488491	1	1
ENSG00000160563	MED27	-2.23955	-163.063	0.02512	0.00907178	0.0398569	1	1
ENSG00000096384	HSP90AB1	2.23832	1315.76	0.0252	0.0374959	2.56778e-05	1	2
ENSG00000184508	HDDC3	-2.23832	-150.443	0.0252	0.0174516	0.00428181	1	1
ENSG00000017797	RALBP1	-2.23808	-23.4716	0.0252158	0.0108955	0.0242341	14	15
ENSG00000102755	FLT1	-2.23715	-191.554	0.0252766	0.0439327	5.03551e-06	4	5
ENSG00000267906	NA	-2.23679	-568.949	0.0253	0.0196225	0.00243945	1	2
ENSG00000196810	CTBP1-DT	2.23661	4.72484	0.0253119	0.00848409	0.0468948	29	35
ENSG00000178719	GRINA	2.23656	207.543	0.0253154	0.0148123	0.00853865	2	2
ENSG00000100439	ABHD4	-2.23625	-12.0349	0.0253356	0.00829764	0.0493912	35	43
ENSG00000088992	TESC	2.23604	3.95016	0.0253495	0.156193	7.16393e-19	13	14
ENSG00000168405	CMAHP	-2.23601	-2.02624	0.0253514	0.216597	2.00371e-26	11	14
ENSG00000172687	ZNF738	2.23595	1.93778	0.0253552	0.413909	8.44477e-56	21	25
ENSG00000090054	SPTLC1	-2.23574	-3.55537	0.025369	0.242906	6.84988e-30	33	34
ENSG00000196787	H2AC11	-2.23405	-169.198	0.02548	0.014718	0.00875329	1	1
ENSG00000103365	GGA2	2.23351	14.4153	0.0255154	0.0219578	0.00133691	39	43
ENSG00000169696	ASPSCR1	2.23263	8.33976	0.0255735	0.0134102	0.0123654	20	25
ENSG00000204186	ZDBF2	2.23159	9.48312	0.0256422	0.021394	0.00154536	7	8
ENSG00000054219	LY75	-2.23044	-5.84724	0.0257184	0.0338431	6.47663e-05	19	19
ENSG00000105722	ERF	-2.22891	-149.638	0.02582	0.0208224	0.00179021	1	1
ENSG00000120314	WDR55	-2.22882	-8.97832	0.0258257	0.043506	5.60979e-06	7	10
ENSG00000113845	TIMMDC1	2.22866	138.562	0.0258364	0.0101445	0.0297101	9	10
ENSG00000223959	AFG3L1P	2.22862	15.2092	0.0258393	0.0182717	0.00346035	6	9
ENSG00000003249	DBNDD1	2.22848	10.249	0.0258486	0.0553451	2.7901e-07	11	14
ENSG00000100842	EFS	-2.22795	-3.62801	0.0258841	0.18601	1.56072e-22	11	12
ENSG00000163113	NA	-2.22651	-183.737	0.02598	0.0139642	0.0106786	1	1
ENSG00000001626	CFTR	2.2254	3.81533	0.0260542	0.101264	1.99758e-12	14	15
ENSG00000236548	RNF217-AS1	2.22502	157.978	0.02608	0.00964701	0.0340318	1	2
ENSG00000183090	FREM3	-2.22488	-2.91552	0.0260893	0.237519	3.58781e-29	15	20
ENSG00000013573	DDX11	2.22481	4.02479	0.0260937	0.779744	1.51794e-154	21	36
ENSG00000144057	ST6GAL2	2.22429	3.29038	0.0261291	0.145062	1.553e-17	24	25
ENSG00000134825	TMEM258	-2.22251	-20.949	0.0262488	0.0126257	0.0152333	5	6
ENSG00000177700	POLR2L	2.22201	4.95389	0.0262824	0.117685	2.5765e-14	9	11
ENSG00000163131	CTSS	2.22152	2.82268	0.0263156	0.121933	8.26721e-15	28	30
ENSG00000172932	ANKRD13D	-2.22145	-152.677	0.0263202	0.0150532	0.00801465	2	3
ENSG00000198846	TOX	2.22072	704.643	0.02637	0.0194624	0.00254243	1	2
ENSG00000204228	HSD17B8	2.21981	10.5569	0.0264318	0.0690347	8.50573e-09	8	8
ENSG00000138709	LARP1B	-2.2179	-2.61368	0.0265618	0.0203296	0.00203259	16	20
ENSG00000110218	PANX1	2.21784	2.85892	0.026566	0.166113	4.47239e-20	18	20
ENSG00000068745	IP6K2	-2.2171	-13.7582	0.0266162	0.0460588	2.93953e-06	4	5
ENSG00000262879	ENSG00000262879	-2.21612	-2.53889	0.0266834	0.28676	6.13938e-36	15	17
ENSG00000131165	CHMP1A	2.21566	4.22206	0.0267151	0.0240491	0.000782194	14	15
ENSG00000162585	FAAP20	2.21417	5.89274	0.026817	0.0275693	0.000318582	8	10
ENSG00000159714	ZDHHC1	-2.21297	-172.61	0.0269	0.0181062	0.00361221	1	1
ENSG00000075975	MKRN2	-2.21254	-7.02513	0.0269292	0.130908	7.36633e-16	17	20
ENSG00000169896	ITGAM	2.21239	139.452	0.02694	0.0122418	0.0168771	1	1
ENSG00000170959	DCDC1	2.21135	4.95287	0.0270118	0.085035	1.38033e-10	51	64
ENSG00000143363	PRUNE1	2.21039	10.195	0.0270779	0.0434914	5.63062e-06	15	21
ENSG00000135108	FBXO21	-2.20907	-161.621	0.02717	0.0126453	0.0151538	1	1
ENSG00000176293	ZNF135	-2.2085	-10.3234	0.0272095	0.0550112	3.03708e-07	6	7
ENSG00000167771	RCOR2	2.20792	149.065	0.02725	0.0296942	0.000185572	1	1
ENSG00000151322	NPAS3	2.20791	20.3195	0.0272509	0.0109284	0.0240197	10	11
ENSG00000187123	LYPD6	-2.20715	-8.70233	0.0273036	0.0515459	7.31835e-07	34	38
ENSG00000111802	TDP2	2.20714	11.3006	0.0273041	0.0238708	0.000818703	22	26
ENSG00000165434	PGM2L1	2.20682	13.7746	0.0273269	0.0197481	0.00236159	12	12
ENSG00000154229	PRKCA	-2.2036	-10.5192	0.0275527	0.0403065	1.26069e-05	54	62
ENSG00000100147	CCDC134	2.20273	5.58382	0.0276141	0.037722	2.42499e-05	5	7
ENSG00000182010	RTKN2	-2.20263	-6.62631	0.0276208	0.0454771	3.40601e-06	9	11
ENSG00000235677	NPM1P26	-2.20225	-7.71936	0.0276477	0.0539109	4.01595e-07	7	7
ENSG00000168135	KCNJ4	-2.20211	-6.61595	0.0276575	0.0386757	1.90488e-05	11	17
ENSG00000031081	ARHGAP31	-2.20183	-4.26467	0.0276776	0.0182938	0.00344064	10	10
ENSG00000234187	AIMP1P1	2.20165	182.008	0.02769	0.0149959	0.00813618	1	1
ENSG00000053254	FOXN3	2.20137	152.644	0.02771	0.0169824	0.0048382	1	1
ENSG00000153827	TRIP12	2.20064	170.444	0.0277613	0.0266266	0.000405046	2	2
ENSG00000154813	DPH3	-2.19945	-298.405	0.0278456	0.0178363	0.00387445	3	5
ENSG00000141424	SLC39A6	-2.19903	-11.3084	0.0278757	0.0215901	0.00146936	14	19
ENSG00000116729	WLS	2.19846	2.3141	0.0279164	0.0695103	7.5304e-09	27	32
ENSG00000182230	NA	2.19823	6.56313	0.0279328	0.151202	2.85923e-18	26	35
ENSG00000111275	ALDH2	2.19796	5.22627	0.0279521	0.0653757	2.16824e-08	28	32
ENSG00000100234	TIMP3	-2.19673	-170.783	0.02804	0.0244795	0.000700665	1	1
ENSG00000174038	C9orf131	-2.19629	-117.547	0.0280709	0.0148928	0.00835976	3	3
ENSG00000152822	GRM1	-2.19549	-209.267	0.0281287	0.0177385	0.00397408	2	2
ENSG00000127990	SGCE	-2.19505	-174.03	0.02816	0.0157591	0.00665973	1	1
ENSG00000168496	FEN1	-2.19465	-7.36135	0.0281887	0.0495013	1.22899e-06	10	13
ENSG00000254473	UBQLN1-AS1	-2.1946	-3.55223	0.0281922	0.0665826	1.59283e-08	7	8
ENSG00000158315	RHBDL2	2.19379	11.5952	0.0282502	0.0282597	0.000267246	27	30
ENSG00000156097	GPR61	2.19138	1.94951	0.0284245	0.0133645	0.0125164	15	15
ENSG00000214659	KRT8P26	2.1912	4.03964	0.0284372	0.155311	9.15389e-19	21	25
ENSG00000140030	GPR65	-2.19093	-23.6402	0.0284571	0.0311758	0.000127386	17	19
ENSG00000171476	HOPX	2.19077	12.6806	0.0284687	0.0318123	0.000108387	32	41
ENSG00000144468	RHBDD1	2.18939	13.7655	0.0285682	0.0181661	0.00355652	3	4
ENSG00000261005	NA	2.18827	156.953	0.02865	0.0163557	0.00569746	1	1
ENSG00000137309	HMGA1	2.18591	14.6147	0.0288221	0.0222204	0.00124974	44	53
ENSG00000136813	ECPAS	-2.18556	-12.5476	0.0288478	0.00919171	0.0385619	17	22
ENSG00000146676	PURB	-2.18403	-283.22	0.0289598	0.0294738	0.000196264	2	2
ENSG00000165072	MAMDC2	2.18341	3.96903	0.0290056	0.11476	5.62061e-14	52	59
ENSG00000006282	SPATA20	2.18337	1.76285	0.0290083	0.678673	1.83642e-116	17	17
ENSG00000099785	MARCHF2	2.18284	245.429	0.0290476	0.0199695	0.0022304	2	2
ENSG00000119537	KDSR	-2.18277	-6.39552	0.0290526	0.0757362	1.52316e-09	20	20
ENSG00000044115	CTNNA1	-2.18216	-7.02273	0.0290974	0.0314914	0.000117582	38	42
ENSG00000075213	SEMA3A	-2.18132	-153.775	0.02916	0.00977334	0.0328759	1	1
ENSG00000151773	CCDC122	-2.1812	-2.3939	0.0291689	0.218126	1.26914e-26	82	95
ENSG00000137106	GRHPR	-2.17979	-9.15907	0.0292732	0.0366275	3.19922e-05	16	17
ENSG00000119041	GTF3C3	2.17943	171.193	0.0293	0.0113882	0.0212188	1	1
ENSG00000135503	ACVR1B	-2.17916	-170.435	0.02932	0.0125504	0.0155424	1	1
ENSG00000010610	CD4	2.17802	14.9295	0.0294047	0.0290298	0.000219711	5	7
ENSG00000142910	TINAGL1	-2.17783	-159.656	0.0294186	0.0142373	0.00993549	2	2
ENSG00000146670	CDCA5	2.17781	138.336	0.02942	0.015823	0.0065492	1	1
ENSG00000154518	ATP5MC3	-2.17745	2.10803	0.0294472	0.321704	5.03602e-41	98	106
ENSG00000109956	B3GAT1	2.17689	7.90883	0.0294886	0.0638784	3.1778e-08	14	19
ENSG00000113240	CLK4	2.17661	151.482	0.02951	0.0235915	0.000879375	1	1
ENSG00000092969	TGFB2	-2.1746	-139.677	0.02966	0.0236594	0.000864225	1	1
ENSG00000065357	DGKA	2.17407	159.103	0.0297	0.01263	0.0152158	1	1
ENSG00000092036	HAUS4	-2.17175	-4.74802	0.0298747	0.230604	2.95663e-28	11	12
ENSG00000267100	ILF3-DT	-2.17163	-5.96387	0.0298835	0.22152	4.59103e-27	21	25
ENSG00000160539	PLPP7	-2.17141	-166.564	0.0299	0.0180293	0.00368501	1	1
ENSG00000184209	SNRNP35	2.17088	3800.06	0.02994	0.0312691	0.000124405	1	2
ENSG00000044090	CUL7	2.16875	8.7877	0.030102	0.0325743	8.93383e-05	22	24
ENSG00000167216	KATNAL2	2.16838	3.88335	0.0301294	0.150693	3.29086e-18	69	75
ENSG00000080371	RAB21	-2.16809	-16.5521	0.0301519	0.0177965	0.00391462	10	12
ENSG00000039319	ZFYVE16	-2.16689	-4.85555	0.0302434	0.125459	3.20561e-15	49	56
ENSG00000147649	MTDH	-2.16686	-15.1911	0.0302458	0.0365555	3.25811e-05	23	31
ENSG00000155016	CYP2U1	2.16571	16.1067	0.0303332	0.0160745	0.00613206	10	13
ENSG00000087258	GNAO1	2.16414	29.5371	0.0304534	0.0235766	0.000882742	2	5
ENSG00000132466	ANKRD17	-2.1638	-151.59	0.03048	0.0130891	0.0134658	1	2
ENSG00000164048	ZNF589	2.16376	7.91218	0.0304825	0.0273541	0.000336523	17	21
ENSG00000183230	CTNNA3	2.16374	7.93578	0.0304841	0.00873607	0.0437297	11	15
ENSG00000105695	MAG	-2.16358	-40.6077	0.0304964	0.0335764	6.92953e-05	2	2
ENSG00000188997	KCTD21	2.16195	1.09398	0.0306221	0.2512	5.23041e-31	42	54
ENSG00000196843	ARID5A	2.16103	16.0587	0.030693	0.00893959	0.0413373	3	6
ENSG00000117475	BLZF1	2.16017	14.105	0.0307597	0.0165485	0.00541778	9	10
ENSG00000127603	MACF1	-2.15998	-18.2095	0.0307742	0.0167352	0.00516016	11	12
ENSG00000178498	DTX3	-2.15943	-83.7265	0.0308168	0.0116996	0.0195155	3	3
ENSG00000172209	GPR22	2.15855	11.4475	0.0308852	0.0175236	0.00420245	18	21
ENSG00000150456	EEF1AKMT1	-2.15844	-16.4345	0.0308933	0.028552	0.000248092	7	9
ENSG00000176953	NFATC2IP	-2.15792	-9.03476	0.030934	0.0401685	1.30553e-05	12	18
ENSG00000124610	H1-1	2.15746	381.709	0.0309699	0.0190725	0.00281215	2	2
ENSG00000215447	NA	2.15647	1.48179	0.0310468	0.634941	1.36366e-103	11	12
ENSG00000152784	PRDM8	-2.15627	-9.67287	0.0310623	0.0206379	0.00187733	4	10
ENSG00000143494	VASH2	2.15602	20.6736	0.0310821	0.0130147	0.0137348	14	16
ENSG00000186812	ZNF397	2.15592	11874.1	0.03109	0.0210044	0.00170826	1	2
ENSG00000198931	APRT	2.15573	7.9993	0.0311045	0.0370601	2.86732e-05	11	13
ENSG00000253767	PCDHGA8	2.15406	87.7056	0.0312354	0.0122029	0.0170538	2	2
ENSG00000116918	TSNAX	-2.15396	-189.696	0.0312433	0.0207324	0.00183217	2	2
ENSG00000108395	TRIM37	-2.15394	-11.2367	0.0312447	0.028622	0.000243714	13	16
ENSG00000169714	CNBP	2.15349	645.569	0.03128	0.0441757	4.73502e-06	1	2
ENSG00000215271	NA	-2.15243	-17.3718	0.0313635	0.0116279	0.0198946	2	2
ENSG00000136381	IREB2	2.15198	4.47686	0.0313992	0.114631	5.81786e-14	23	28
ENSG00000105656	ELL	2.1506	11.911	0.031508	0.0227903	0.00107974	8	9
ENSG00000167601	AXL	-2.15023	-9.02741	0.0315372	0.0190963	0.00279492	20	25
ENSG00000163482	STK36	-2.15008	-197.726	0.0315487	0.0414556	9.42583e-06	2	2
ENSG00000234635	NA	2.14894	18.4624	0.031639	0.00903022	0.0403162	19	25
ENSG00000172456	FGGY	-2.14829	-5.80366	0.031691	0.159652	2.73281e-19	91	123
ENSG00000088543	C3orf18	-2.14744	-18.0124	0.0317582	0.0214021	0.00154213	5	7
ENSG00000145194	ECE2	2.14488	5.55771	0.0319622	0.220145	6.93479e-27	14	16
ENSG00000092140	G2E3	2.14237	8.54012	0.0321635	0.0721883	3.79003e-09	23	29
ENSG00000114744	COMMD2	-2.14229	-4.70855	0.0321701	0.172365	7.66432e-21	8	10
ENSG00000180448	ARHGAP45	-2.14073	-11.3145	0.0322959	0.0453916	3.48051e-06	29	31
ENSG00000196498	NCOR2	-2.14057	-3.22172	0.0323086	0.0373687	2.65184e-05	54	63
ENSG00000069122	ADGRF5	-2.1402	-7.91975	0.0323383	0.0346784	5.2412e-05	55	65
ENSG00000145416	MARCHF1	-2.13941	-5.65065	0.0324021	0.0094766	0.0356587	43	47
ENSG00000243244	STON1	-2.13857	-1.89977	0.0324705	0.347055	7.04517e-45	45	57
ENSG00000004975	DVL2	2.13807	80.2039	0.0325112	0.0244983	0.000697304	3	3
ENSG00000092068	SLC7A8	2.13712	8.15167	0.032588	0.0302501	0.000161134	26	34
ENSG00000154478	GPR26	-2.13689	-14.8062	0.0326073	0.058716	1.1842e-07	15	16
ENSG00000108592	FTSJ3	-2.13686	-1.59218	0.0326092	0.527357	1.57848e-77	126	138
ENSG00000185838	GNB1L	-2.13571	-4.88201	0.0327034	0.0966092	6.77291e-12	53	77
ENSG00000152128	TMEM163	2.13475	13.7723	0.0327815	0.0446773	4.17039e-06	23	27
ENSG00000257647	ENSG00000257647	-2.13437	-13.6996	0.0328129	0.0319791	0.000103896	10	11
ENSG00000258301	VASH1-AS1	2.133	8.50514	0.0329248	0.0219178	0.00135071	52	62
ENSG00000104689	TNFRSF10A	2.13253	14.4251	0.0329631	0.0179152	0.0037958	5	6
ENSG00000114646	CSPG5	-2.13014	-172.528	0.03316	0.0289558	0.000223884	1	1
ENSG00000185442	FAM174B	-2.12999	-6.79273	0.0331724	0.0203981	0.001997	23	27
ENSG00000145331	TRMT10A	2.12904	8.05898	0.0332506	0.0417526	8.74334e-06	40	45
ENSG00000176641	RNF152	-2.12861	-15.1919	0.0332863	0.0323612	9.42989e-05	13	16
ENSG00000162946	DISC1	-2.12782	-10.4468	0.0333522	0.0559285	2.40573e-07	37	44
ENSG00000250257	LDHAL6DP	2.12746	193.657	0.0333816	0.0118334	0.018827	2	2
ENSG00000085365	SCAMP1	2.12575	13.4729	0.0335241	0.0100439	0.0305351	10	11
ENSG00000214439	FAM185BP	2.12532	5.1114	0.03356	0.315652	3.9916e-40	38	68
ENSG00000109458	GAB1	-2.1248	-9.38428	0.0336035	0.0245572	0.000686899	6	7
ENSG00000116922	C1orf109	-2.12386	-3.50257	0.0336821	0.278686	8.47975e-35	33	36
ENSG00000089902	RCOR1	2.1237	10.4705	0.0336949	0.0612115	6.27293e-08	31	36
ENSG00000153233	PTPRR	-2.12276	-26.4506	0.0337739	0.00983074	0.0323642	13	16
ENSG00000176208	ATAD5	-2.12184	-4.97518	0.0338508	0.0425505	7.1446e-06	27	29
ENSG00000185149	NPY2R	-2.12133	-11.0168	0.0338937	0.344154	1.97858e-44	26	30
ENSG00000171723	GPHN	2.12051	127.722	0.0339631	0.011542	0.0203591	2	2
ENSG00000224924	LINC00320	-2.12022	-1.03037	0.0339873	0.138887	8.42211e-17	8	9
ENSG00000146063	TRIM41	2.11983	172.731	0.03402	0.0198234	0.00231614	1	2
ENSG00000008838	MED24	2.11983	2.58725	0.0340201	0.297325	1.89079e-37	11	12
ENSG00000197586	ENTPD6	-2.11927	-5.3116	0.0340673	0.0601514	8.21774e-08	15	16
ENSG00000153113	CAST	-2.11832	-2.61892	0.0341477	0.139794	6.57461e-17	9	10
ENSG00000174032	SLC25A30	2.11818	382.608	0.03416	0.0243564	0.000723072	1	2
ENSG00000119922	IFIT2	-2.11794	-146.379	0.03418	0.0209085	0.00175094	1	1
ENSG00000099840	IZUMO4	2.11793	19.5285	0.0341809	0.0106938	0.0255933	17	23
ENSG00000180139	ACTA2-AS1	-2.1176	-21.1799	0.0342091	0.0115845	0.0201281	27	36
ENSG00000095380	NANS	-2.11743	-7.18805	0.0342235	0.0625625	4.44543e-08	11	12
ENSG00000171295	ZNF440	-2.11726	-152.042	0.0342381	0.0198863	0.00227881	2	2
ENSG00000160741	CRTC2	2.11542	14.7446	0.034394	0.0141561	0.0101509	24	26
ENSG00000125445	MRPS7	-2.11501	-5.68777	0.0344291	0.0649903	2.39249e-08	9	9
ENSG00000105447	GRWD1	-2.11491	-12.2168	0.0344377	0.0314187	0.000119771	4	8
ENSG00000171791	BCL2	2.11486	12.4153	0.0344419	0.0271813	0.000351665	8	8
ENSG00000135631	RAB11FIP5	-2.11453	-10.8337	0.0344704	0.0117058	0.0194829	22	36
ENSG00000213930	GALT	2.11441	13.9162	0.0344801	0.0292029	0.000210254	21	28
ENSG00000160072	ATAD3B	2.11435	-1.99989	0.0344851	0.271389	8.87431e-34	36	47
ENSG00000103047	TANGO6	-2.11379	-12.9703	0.0345334	0.0248895	0.000630965	13	15
ENSG00000186479	RGS7BP	2.11284	212.108	0.0346143	0.0263738	0.00043201	3	3
ENSG00000119699	TGFB3	-2.11266	-226.977	0.0346296	0.0188046	0.00301402	4	4
ENSG00000090612	ZNF268	2.11251	3.3705	0.0346431	0.181024	6.52107e-22	21	23
ENSG00000161395	PGAP3	2.11243	119.677	0.0346492	0.0306757	0.000144628	3	3
ENSG00000174748	RPL15	2.11079	172.928	0.03479	0.0189905	0.00287246	1	2
ENSG00000115138	POMC	-2.11069	-2.64931	0.0347991	0.347762	5.47285e-45	20	24
ENSG00000106733	NMRK1	2.11066	1.23558	0.0348014	0.674338	4.12726e-115	41	44
ENSG00000117616	RSRP1	-2.11056	-164.293	0.03481	0.0347821	5.10531e-05	1	1
ENSG00000100784	RPS6KA5	2.10928	145.349	0.03492	0.0100739	0.0302868	1	1
ENSG00000006432	MAP3K9	2.10879	6.72212	0.0349629	0.0520909	6.37353e-07	11	12
ENSG00000163795	ZNF513	2.1087	147.219	0.0349707	0.0357273	4.01829e-05	4	4
ENSG00000134851	TMEM165	2.10854	4.25991	0.0349843	0.177732	1.66887e-21	26	30
ENSG00000168264	IRF2BP2	-2.10785	-7.85188	0.0350436	0.0453419	3.52464e-06	53	59
ENSG00000185989	RASA3	2.10764	7.33289	0.0350618	0.0287395	0.000236543	13	17
ENSG00000235945	ENSG00000235945	-2.10729	-174.394	0.0350926	0.0272792	0.000343007	2	2
ENSG00000152433	ZNF547	-2.10674	-9.41529	0.03514	0.0282552	0.000267549	32	35
ENSG00000106086	PLEKHA8	-2.1049	-3.76173	0.0352996	0.194046	1.52995e-23	6	6
ENSG00000145700	ANKRD31	2.10126	5.63725	0.0356181	0.096911	6.25831e-12	96	105
ENSG00000180385	EMC3-AS1	-2.10105	-8.9655	0.0356363	0.0565852	2.03597e-07	32	41
ENSG00000172346	CSDC2	2.09845	2.28446	0.0358658	0.326992	8.12831e-42	23	34
ENSG00000063046	EIF4B	-2.09828	-172.072	0.03588	0.0435126	5.60038e-06	1	1
ENSG00000213123	DYNLT2B	-2.09472	-6.95576	0.0361959	0.0516122	7.19633e-07	3	5
ENSG00000125122	FBXL9P	-2.09445	-153.217	0.03622	0.0148234	0.0085137	1	1
ENSG00000178665	ZNF713	-2.09404	0.292617	0.0362564	0.0825421	2.63205e-10	28	36
ENSG00000109654	TRIM2	2.09156	13.742	0.0364776	0.0479469	1.82222e-06	5	6
ENSG00000225190	PLEKHM1	-2.09006	-28.2063	0.0366127	0.0135413	0.0119432	3	4
ENSG00000177946	CENPBD1P	2.08906	7.92518	0.0367023	0.0974877	5.38094e-12	13	20
ENSG00000139352	ASCL1	2.08712	160.041	0.0368775	0.0254537	0.000546301	2	2
ENSG00000117500	TMED5	-2.08488	-7.14615	0.0370803	0.061212	6.2721e-08	39	43
ENSG00000107020	PLGRKT	2.08486	20.7977	0.0370824	0.0141387	0.0101974	3	5
ENSG00000203335	ENSG00000203335	-2.08475	-152.446	0.0370918	0.00851854	0.0464483	2	2
ENSG00000140853	NLRC5	-2.08345	-163.846	0.03721	0.0250397	0.000607214	1	1
ENSG00000184986	TMEM121	-2.0829	-1257.43	0.03726	0.0122215	0.0169689	1	3
ENSG00000204961	PCDHA9	2.08227	1.81068	0.0373179	0.496517	3.80186e-71	59	76
ENSG00000162437	RAVER2	2.08224	6.2195	0.0373206	0.0775165	9.63134e-10	9	9
ENSG00000160963	COL26A1	2.08136	37.8605	0.0374011	0.0140463	0.0104493	5	6
ENSG00000225725	FAM66E	-2.08115	-167.262	0.03742	0.012502	0.0157444	1	1
ENSG00000105784	RUNDC3B	-2.08107	-193.555	0.0374274	0.0360287	3.72297e-05	2	2
ENSG00000069849	ATP1B3	2.08082	7.97908	0.0374507	0.0428057	6.69769e-06	13	13
ENSG00000231632	NA	2.08039	139.235	0.03749	0.00953144	0.0351265	1	1
ENSG00000110395	CBL	2.08002	8.01224	0.0375235	0.0368919	2.99202e-05	28	32
ENSG00000161960	EIF4A1	2.07995	155.461	0.03753	0.0175277	0.0041979	1	1
ENSG00000150760	DOCK1	2.07951	14.3263	0.0375707	0.0239844	0.000795251	9	12
ENSG00000121988	ZRANB3	-2.07939	-5.732	0.0375816	0.026132	0.000459483	33	40
ENSG00000225968	ELFN1	-2.07875	-193.436	0.03764	0.0326005	8.87475e-05	1	2
ENSG00000163879	DNALI1	2.07804	4.40199	0.0377055	0.126823	2.21994e-15	42	45
ENSG00000075188	NUP37	2.07767	157.224	0.03774	0.0127745	0.0146412	1	1
ENSG00000188730	VWC2	-2.07751	-224.502	0.0377549	0.0265115	0.000417108	2	3
ENSG00000064199	SPA17	2.07631	5.83162	0.0378653	0.0807675	4.16381e-10	10	10
ENSG00000075415	SLC25A3	-2.07424	-10.0479	0.0380566	0.039341	1.60967e-05	7	8
ENSG00000113448	PDE4D	-2.07406	-0.00485735	0.038074	0.0326126	8.84764e-05	29	41
ENSG00000160862	AZGP1	2.07376	15.8109	0.0381016	0.0338821	6.41291e-05	4	4
ENSG00000178971	CTC1	2.07322	11.3481	0.0381518	0.0211978	0.00162531	31	36
ENSG00000181873	IBA57	2.07302	138.861	0.03817	0.0131774	0.0131534	1	1
ENSG00000023572	GLRX2	2.07263	4.6823	0.0382064	0.0803803	4.60161e-10	6	9
ENSG00000037042	TUBG2	2.07239	2.49644	0.0382287	0.282094	2.80891e-35	14	16
ENSG00000152953	STK32B	-2.07125	-5.84697	0.0383354	0.0112313	0.0221346	41	52
ENSG00000131626	PPFIA1	2.07112	5.69151	0.038348	0.0447977	4.0452e-06	13	14
ENSG00000131876	SNRPA1	2.07108	9.40527	0.0383509	0.0475359	2.02216e-06	17	18
ENSG00000100056	ESS2	2.07106	10.8305	0.0383532	0.0630467	3.92899e-08	8	8
ENSG00000119383	PTPA	2.07078	0.088606	0.0383793	0.0594884	9.72878e-08	41	51
ENSG00000118322	ATP10B	2.07041	3.49004	0.0384139	0.453458	7.3737e-63	33	45
ENSG00000203867	RBM20	2.07012	11.7101	0.0384407	0.0284244	0.000256278	7	8
ENSG00000143190	POU2F1	2.0701	7.45753	0.038443	0.0228227	0.0010708	13	16
ENSG00000149639	SOGA1	-2.0687	-7.91601	0.0385738	0.0240339	0.000785239	11	11
ENSG00000198700	IPO9	-2.06828	-6.15597	0.0386141	0.139014	8.13548e-17	30	39
ENSG00000205352	PRR13	2.06814	357.873	0.038627	0.012164	0.0172321	2	2
ENSG00000160948	VPS28	-2.06802	-2.18436	0.0386381	0.351775	1.30012e-45	21	25
ENSG00000267882	ENSG00000267882	-2.06673	-161.114	0.03876	0.0389449	1.7794e-05	1	1
ENSG00000138185	ENTPD1	-2.06672	-8.26907	0.0387601	0.0333694	7.30286e-05	14	17
ENSG00000240401	ENSG00000240401	-2.06576	-199.382	0.0388511	0.0209214	0.00174514	4	4
ENSG00000205212	CCDC144NL	-2.06446	-5.57264	0.0389737	0.163245	1.0004e-19	14	17
ENSG00000156253	RWDD2B	2.06415	1.02983	0.0390031	0.605508	9.0705e-96	18	19
ENSG00000184068	SREBF2-AS1	2.06283	22.1078	0.0391283	0.0282592	0.000267282	9	11
ENSG00000100726	TELO2	2.06239	3.34886	0.0391708	0.260678	2.67431e-32	11	12
ENSG00000012124	CD22	2.06187	53.3685	0.03922	0.013218	0.0130124	1	1
ENSG00000146122	DAAM2	-2.06185	-243.006	0.0392217	0.0323183	9.53303e-05	3	3
ENSG00000163684	RPP14	-2.05998	-162.327	0.0394	0.0134349	0.0122848	1	1
ENSG00000101236	RNF24	2.05987	8.48679	0.0394105	0.129803	9.93196e-16	14	15
ENSG00000144645	OSBPL10	-2.05921	-12.6686	0.0394745	0.0175615	0.00416117	7	9
ENSG00000214063	TSPAN4	2.0584	9.29995	0.0395519	0.0127392	0.0147794	11	15
ENSG00000179950	PUF60	-2.05769	-56.7577	0.03962	0.0110518	0.0232327	1	2
ENSG00000185742	C11orf87	2.05613	165.846	0.03977	0.0153352	0.00744255	1	1
ENSG00000113356	POLR3G	-2.05583	-15.6173	0.0397987	0.0195611	0.00247841	13	13
ENSG00000100341	PNPLA5	-2.0558	-6.34352	0.0398018	0.0954921	9.07211e-12	24	27
ENSG00000164916	FOXK1	-2.05511	-10.296	0.0398684	0.0265734	0.000410582	21	24
ENSG00000159063	ALG8	-2.05492	-2.58679	0.0398863	0.179894	9.009e-22	12	12
ENSG00000129084	PSMA1	-2.05468	-159.92	0.03991	0.0310268	0.000132295	1	1
ENSG00000085721	RRN3	2.05401	8.36563	0.0399745	0.0910845	2.86632e-11	27	39
ENSG00000232578	ENSG00000232578	2.05369	8.61002	0.040006	0.0469165	2.36561e-06	16	20
ENSG00000024422	EHD2	-2.0526	-168.952	0.0401114	0.0163432	0.00571616	3	3
ENSG00000011347	SYT7	2.05241	160.33	0.04013	0.0417932	8.65381e-06	1	1
ENSG00000136448	NMT1	2.05214	7.24187	0.0401563	0.0262822	0.000442223	5	6
ENSG00000117335	CD46	2.05205	0.634277	0.0401644	0.37458	3.10437e-49	11	11
ENSG00000099995	SF3A1	-2.052	-146.979	0.04017	0.00931183	0.0373088	1	1
ENSG00000165475	CRYL1	-2.05041	-19.2853	0.0403246	0.0147903	0.0085881	15	15
ENSG00000241316	SUCLG2-DT	2.04934	1.69541	0.0404284	0.475347	5.48484e-67	13	14
ENSG00000107201	RIGI	-2.04715	-25.9186	0.040643	0.00903369	0.0402777	8	10
ENSG00000132793	LPIN3	-2.04694	-8.81573	0.0406635	0.044656	4.19296e-06	4	4
ENSG00000134744	TUT4	-2.04669	-6.00635	0.0406883	0.0754864	1.62426e-09	18	18
ENSG00000269399	ENSG00000269399	-2.04645	-170.494	0.0407118	0.0181968	0.00352829	2	2
ENSG00000197927	NBEAP2	-2.04556	-225.529	0.0408	0.027422	0.000330759	1	2
ENSG00000183087	GAS6	-2.04434	-174.743	0.04092	0.0204789	0.00195583	1	1
ENSG00000126267	COX6B1	2.04368	15.7044	0.0409851	0.0428179	6.67705e-06	27	35
ENSG00000110871	COQ5	-2.04341	-3.67631	0.0410118	0.198529	4.14765e-24	38	44
ENSG00000157110	RBPMS	-2.04324	-7.74246	0.0410284	0.038557	1.96296e-05	18	19
ENSG00000116679	IVNS1ABP	2.04323	156.322	0.04103	0.0416284	9.02243e-06	1	1
ENSG00000197776	KLHDC1	-2.04297	-9.49277	0.0410553	0.0691671	8.22223e-09	37	44
ENSG00000125637	PSD4	2.04194	7.01003	0.0411571	0.0314216	0.000119683	20	21
ENSG00000215421	ZNF407	2.04093	1.35037	0.0412576	0.151249	2.8218e-18	18	21
ENSG00000137449	CPEB2	-2.04093	-11.0262	0.0412576	0.00854883	0.0460594	44	61
ENSG00000164270	HTR4	-2.04091	-7.96921	0.0412596	0.0711061	5.00275e-09	29	31
ENSG00000267325	LINC01415	-2.03936	-178.272	0.0414141	0.0344852	5.50406e-05	2	2
ENSG00000127666	TICAM1	-2.03935	-44.8934	0.0414154	0.0126628	0.0150832	7	9
ENSG00000150630	VEGFC	2.03905	182.673	0.0414455	0.0305226	0.000150362	4	4
ENSG00000170185	USP38	2.0384	156.135	0.04151	0.0222098	0.00125312	1	1
ENSG00000182810	DDX28	-2.0384	-179.43	0.04151	0.0316252	0.000113657	1	1
ENSG00000251226	LINC02714	2.0378	1.09948	0.0415695	0.48275	2.01424e-68	6	9
ENSG00000023171	GRAMD1B	2.03778	78.8268	0.0415715	0.0110448	0.0232767	2	2
ENSG00000123505	AMD1	2.0374	181.911	0.04161	0.0588963	1.13111e-07	1	1
ENSG00000171408	PDE7B	2.03549	3.89316	0.0418021	0.010697	0.0255713	22	28
ENSG00000157601	MX1	-2.03403	-17.4562	0.0419481	0.0158215	0.00655173	8	10
ENSG00000123607	TTC21B	2.03345	8.10051	0.0420066	0.0197542	0.00235784	17	23
ENSG00000197177	ADGRA1	2.03305	0.40576	0.0420478	0.245464	3.1074e-30	15	16
ENSG00000119396	RAB14	-2.03261	-231.903	0.0420918	0.00930206	0.0374091	2	2
ENSG00000075303	SLC25A40	2.03213	30.6018	0.04214	0.0133682	0.0125039	3	6
ENSG00000167925	GHDC	-2.03174	-188.512	0.04218	0.0218876	0.00136122	1	1
ENSG00000168904	LRRC28	2.03149	171.569	0.0422049	0.0205461	0.00192225	2	3
ENSG00000103254	ANTKMT	2.03039	26.1148	0.0423169	0.0130306	0.0136769	30	43
ENSG00000143543	JTB	-2.02866	-252.624	0.0424933	0.0167058	0.00519997	4	7
ENSG00000138639	ARHGAP24	2.02792	7.93019	0.0425683	0.0290825	0.000216788	22	27
ENSG00000198142	SOWAHC	2.02615	10.6244	0.0427492	0.0600303	8.47503e-08	13	19
ENSG00000263753	LINC00667	-2.02552	-1.81439	0.0428138	0.502775	2.07577e-72	60	69
ENSG00000102805	CLN5	2.02532	5.68988	0.042835	0.130488	8.25218e-16	28	33
ENSG00000007402	CACNA2D2	2.02517	172.903	0.04285	0.018379	0.00336539	1	1
ENSG00000261670	ENSG00000261670	2.02478	6.86442	0.0428896	0.100931	2.18034e-12	15	20
ENSG00000174780	SRP72	2.02371	8.1515	0.0429998	0.01845	0.00330407	47	61
ENSG00000171953	ATPAF2	2.02342	9.52136	0.0430299	0.0379693	2.27779e-05	7	7
ENSG00000163683	SMIM14	2.02314	22.6576	0.0430585	0.0455635	3.33227e-06	26	32
ENSG00000213337	ANKRD39	2.02235	174.055	0.04314	0.0222297	0.00124674	1	2
ENSG00000222012	ENSG00000222012	-2.02187	-11.9923	0.0431896	0.0139344	0.0107629	12	15
ENSG00000215012	RTL10	2.0217	3.16216	0.0432076	0.227913	6.68465e-28	24	25
ENSG00000103264	FBXO31	2.02159	186.02	0.043219	0.0172824	0.00447461	3	3
ENSG00000111834	RSPH4A	-2.02109	-143.386	0.0432707	0.0120946	0.017555	2	2
ENSG00000067798	NAV3	2.02003	8.46907	0.0433798	0.0193129	0.00264265	16	17
ENSG00000147853	AK3	2.02002	7.44974	0.0433817	0.077206	1.04332e-09	48	57
ENSG00000102977	ACD	2.01984	4863.12	0.0434	0.0236537	0.000865491	1	3
ENSG00000155657	TTN	2.01778	3.03865	0.0436139	0.26242	1.5421e-32	19	22
ENSG00000113369	ARRDC3	-2.01638	-5162.46	0.04376	0.0277728	0.000302501	1	3
ENSG00000122863	CHST3	2.0141	3.02613	0.0439995	0.185804	1.65601e-22	50	58
ENSG00000159403	C1R	2.0139	147.886	0.04402	0.0244248	0.000710538	1	1
ENSG00000133247	KMT5C	-2.01342	-180.52	0.0440707	0.0398547	1.41341e-05	4	4
ENSG00000166405	RIC3	2.01225	129.029	0.044194	0.0129385	0.0140157	2	2
ENSG00000165966	PDZRN4	-2.01084	-2.53051	0.0443424	0.333038	9.92663e-43	13	13
ENSG00000105926	PALS2	-2.01019	-3.12795	0.0444113	0.0743176	2.19366e-09	9	11
ENSG00000155158	TTC39B	-2.00971	-14.7573	0.0444619	0.0200586	0.00217971	13	14
ENSG00000197362	ZNF786	-2.00958	-7.02416	0.0444756	0.176907	2.11118e-21	10	13
ENSG00000169439	SDC2	-2.00904	-11.7818	0.0445325	0.00983868	0.0322941	36	47
ENSG00000066427	ATXN3	2.00843	7.22833	0.044598	0.105735	6.15162e-13	33	40
ENSG00000172046	USP19	-2.00728	-188.828	0.04472	0.0333459	7.34646e-05	1	1
ENSG00000088448	ANKRD10	2.00627	5.84518	0.0448277	0.0799498	5.14248e-10	13	13
ENSG00000106012	IQCE	-2.00558	-7.96093	0.0449011	0.0223918	0.00119597	10	10
ENSG00000196428	TSC22D2	2.00513	24.5612	0.0449488	0.0113473	0.0214536	6	10
ENSG00000138750	NUP54	-2.00506	-14.1632	0.0449561	0.0157152	0.00673671	17	21
ENSG00000106100	NOD1	-2.00494	-158.133	0.04497	0.0291091	0.000215326	1	1
ENSG00000050628	PTGER3	-2.00441	-1.80182	0.0450264	0.555149	1.20598e-83	91	99
ENSG00000119509	INVS	-2.00262	-7.04138	0.0452177	0.0194048	0.00258057	24	29
ENSG00000049130	KITLG	-2.00177	-185.86	0.04531	0.0198842	0.00228007	1	1
ENSG00000165322	ARHGAP12	2.0017	6.35877	0.045317	0.106078	5.61833e-13	18	21
ENSG00000139737	SLAIN1	2.00037	7.64699	0.0454604	0.0172434	0.00452016	13	19
ENSG00000088854	DNAAF9	-1.99976	-2.69544	0.0455256	0.137748	1.14906e-16	68	72
ENSG00000113319	RASGRF2	1.99942	16.3552	0.0455632	0.017341	0.0044068	17	20
ENSG00000185829	ARL17A	-1.99893	-7.92942	0.045616	0.510866	4.57841e-74	33	38
ENSG00000172428	COPS9	1.99773	163.078	0.0457463	0.0596979	9.22357e-08	2	2
ENSG00000256315	CADM1-AS1	1.99619	4.19619	0.0459133	0.13605	1.82479e-16	34	42
ENSG00000143850	PLEKHA6	1.99586	5.77685	0.045949	0.0371058	2.83435e-05	48	53
ENSG00000077458	FAM76B	1.9936	19.3516	0.0461962	0.0104581	0.0272822	3	3
ENSG00000169609	C15orf40	1.99309	2.28612	0.046252	0.109129	2.5075e-13	25	31
ENSG00000232442	MHENCR	1.99304	15.0271	0.0462572	0.0337257	6.67228e-05	11	14
ENSG00000136643	RPS6KC1	-1.9929	-3.98591	0.0462725	0.0928949	1.78791e-11	56	68
ENSG00000198000	NOL8	-1.99228	-13.2286	0.04634	0.0334193	7.21104e-05	56	65
ENSG00000057252	SOAT1	1.99157	5.62695	0.0464182	0.0927422	1.86058e-11	18	19
ENSG00000140479	PCSK6	1.9914	8.60384	0.0464372	0.0286061	0.000244706	37	44
ENSG00000266967	AARSD1	-1.98992	-159.54	0.0466	0.0145126	0.00923981	1	1
ENSG00000225733	FGD5-AS1	-1.98873	-9.10496	0.0467307	0.0663917	1.67247e-08	15	16
ENSG00000075340	ADD2	1.98836	15.2917	0.0467717	0.0146951	0.00880603	4	4
ENSG00000213064	SFT2D2	-1.98792	-167.478	0.04682	0.0227774	0.00108333	1	1
ENSG00000112232	KHDRBS2	1.98748	7.44689	0.0468695	0.0488902	1.43482e-06	14	23
ENSG00000099910	KLHL22	-1.98666	-151.401	0.04696	0.0329374	8.1481e-05	1	1
ENSG00000155761	SPAG17	1.98639	168.227	0.04699	0.0187562	0.00305205	1	1
ENSG00000139719	VPS33A	-1.98501	-3.8651	0.0471439	0.0130888	0.0134669	11	14
ENSG00000120913	PDLIM2	1.98456	7.57418	0.047194	0.112508	1.02309e-13	7	8
ENSG00000175582	RAB6A	-1.9835	-3.28408	0.0473111	0.306527	8.74944e-39	22	24
ENSG00000089177	KIF16B	-1.9829	-4.83039	0.0473788	0.113646	7.56123e-14	29	33
ENSG00000251023	ENSG00000251023	1.98256	11.9851	0.0474171	0.0128058	0.0145198	17	22
ENSG00000261617	LINC02177	-1.98216	-6.9042	0.0474615	0.100464	2.46482e-12	48	57
ENSG00000175048	ZDHHC14	1.98087	11.7075	0.0476053	0.0124132	0.0161217	31	34
ENSG00000198246	SLC29A3	-1.98032	-2.23936	0.0476675	0.0484172	1.61751e-06	9	10
ENSG00000081014	AP4E1	1.97896	4.3575	0.0478207	0.117919	2.42058e-14	6	7
ENSG00000126804	ZBTB1	1.9779	4.28667	0.0479395	0.129889	9.7041e-16	19	23
ENSG00000088876	ZNF343	1.97723	135.996	0.0480156	0.0187296	0.00307317	2	2
ENSG00000129167	TPH1	1.97714	1.2697	0.0480262	0.327549	6.70225e-42	14	15
ENSG00000184939	ZFP90	1.97657	16.5407	0.0480901	0.0179052	0.0038057	28	31
ENSG00000177613	CSTF2T	1.97574	5.62779	0.0481842	0.117326	2.83574e-14	14	15
ENSG00000197114	ZGPAT	1.97545	7.98738	0.0482168	0.0229292	0.00104199	38	43
ENSG00000189275	LINC01164	1.97532	4.70933	0.0482317	0.117694	2.57018e-14	19	20
ENSG00000182919	C11orf54	1.97529	1.70162	0.0482357	0.529604	5.21517e-78	21	22
ENSG00000257151	NA	-1.97458	-7.03424	0.0483164	0.0531328	4.89291e-07	27	36
ENSG00000106823	ECM2	-1.97401	-6.35819	0.0483807	0.0866259	9.13678e-11	9	12
ENSG00000154473	BUB3	1.974	4.89092	0.0483816	0.0196808	0.00240297	6	6
ENSG00000229989	MIR181A1HG	1.97373	-8.65602	0.048412	0.0176522	0.00406426	3	3
ENSG00000059691	GATB	1.97248	2.55552	0.0485543	0.181939	5.01989e-22	11	15
ENSG00000135723	FHOD1	1.97196	57.0627	0.0486141	0.0195225	0.0025033	4	6
ENSG00000171320	ESCO2	1.97086	152.86	0.04874	0.0177813	0.00393016	1	1
ENSG00000101126	ADNP	1.97077	90.9278	0.0487503	0.016404	0.00562615	2	3
ENSG00000227975	NA	-1.96969	-162.024	0.0488741	0.0372959	2.70116e-05	2	2
ENSG00000033050	ABCF2	-1.96915	-7.66092	0.0489354	0.0623461	4.69768e-08	15	15
ENSG00000174226	SNX31	-1.96911	-2.42921	0.0489399	0.334628	5.69175e-43	40	50
ENSG00000100938	GMPR2	1.96894	172.319	0.04896	0.0307089	0.000143416	1	2
ENSG00000117362	APH1A	1.96894	418.131	0.04896	0.0210655	0.0016816	1	2
ENSG00000243725	TTC4	1.96893	3.8835	0.0489616	0.0597836	9.02449e-08	59	71
ENSG00000154898	CCDC144CP	-1.96876	-2.45697	0.0489802	0.228859	5.01835e-28	10	16
ENSG00000163918	RFC4	-1.96767	-12.1125	0.0491057	0.093732	1.437e-11	6	6
ENSG00000116213	WRAP73	-1.96559	-5.90746	0.0493462	0.0144187	0.00947137	32	34
ENSG00000185596	WASH3P	1.96548	4.92457	0.0493589	0.0450797	3.76651e-06	13	21
ENSG00000164082	GRM2	1.9653	75.0016	0.04938	0.0331776	7.66672e-05	1	3
ENSG00000266490	ENSG00000266490	-1.96528	-4.44066	0.0493822	0.272183	6.88225e-34	7	10
ENSG00000060140	STYK1	1.96448	12.8094	0.0494748	0.0187085	0.00309004	10	12
ENSG00000115339	GALNT3	-1.96436	-7.36085	0.0494886	0.109939	2.02325e-13	40	59
ENSG00000164039	BDH2	-1.9635	-5.20757	0.0495877	0.108743	2.77735e-13	36	39
ENSG00000120742	SERP1	1.96319	9.43002	0.049624	0.0252159	0.000580506	4	4
ENSG00000224531	SMIM13	-1.96285	-3.00941	0.0496636	0.190196	4.66825e-23	26	28
ENSG00000232973	CYP1B1-AS1	1.96171	4.7837	0.0497966	0.205908	4.7651e-25	44	46
ENSG00000152475	ZNF837	1.9615	17.4661	0.0498202	0.0158017	0.0065859	16	23
ENSG00000136518	ACTL6A	-1.95979	-151.999	0.05002	0.0121386	0.0173494	1	1
ENSG00000183207	RUVBL2	1.95967	8.03116	0.0500348	0.077792	8.97138e-10	7	7
ENSG00000139117	CPNE8	-1.95938	-1.95181	0.0500682	0.0655354	2.08154e-08	21	24
ENSG00000260122	ENSG00000260122	-1.95933	-437.421	0.0500737	0.047536	2.0221e-06	3	3
ENSG00000125827	TMX4	-1.9584	-13.8568	0.0501828	0.0839954	1.80694e-10	15	17
ENSG00000248713	C4orf54	1.95727	17.4209	0.0503154	0.0174801	0.00425024	16	17
ENSG00000166140	ZFYVE19	1.95577	9.03579	0.0504923	0.0441935	4.71376e-06	10	11
ENSG00000092203	TOX4	-1.95485	-8.81158	0.0506006	0.0177239	0.00398919	46	58
ENSG00000100802	C14orf93	1.9546	171.632	0.05063	0.0115129	0.0205188	1	1
ENSG00000108588	CCDC47	1.95437	205.253	0.0506574	0.00980303	0.0326102	2	2
ENSG00000156206	CFAP161	1.95367	44.0534	0.05074	0.011158	0.0225762	9	13
ENSG00000225953	SATB2-AS1	1.95359	17.3266	0.05075	0.00856519	0.0458507	1	1
ENSG00000175602	CCDC85B	1.95251	218.984	0.0508779	0.0147606	0.00865552	2	2
ENSG00000250954	ENSG00000250954	1.95249	186.296	0.05088	0.0200351	0.00219297	1	1
ENSG00000180611	MB21D2	1.95227	13.4017	0.0509061	0.0317159	0.000111071	49	54
ENSG00000078237	TIGAR	1.95136	14.9845	0.0510145	0.0104635	0.0272424	27	30
ENSG00000214402	LCNL1	1.94947	8.36272	0.0512397	0.0915417	2.54443e-11	6	6
ENSG00000130770	ATP5IF1	1.94844	21.2845	0.0513625	0.00828567	0.0495562	11	11
ENSG00000185842	DNAH14	1.94835	17.2472	0.0513734	0.0446251	4.22586e-06	29	33
ENSG00000077616	NAALAD2	1.94796	5.44178	0.05142	0.125365	3.28764e-15	31	45
ENSG00000083457	ITGAE	1.94779	149.328	0.05144	0.0216765	0.00143708	1	1
ENSG00000126217	MCF2L	1.9457	6.91153	0.0516902	0.0937357	1.4356e-11	44	51
ENSG00000198373	WWP2	-1.94506	-9.49906	0.0517678	0.0816864	3.28378e-10	15	26
ENSG00000229358	DPY19L1P1	1.94422	23.3341	0.0518689	0.0140085	0.0105543	7	8
ENSG00000204316	MRPL38	1.94336	219.157	0.0519728	0.0122747	0.0167296	2	2
ENSG00000253203	GUSBP3	1.94311	15.3772	0.0520025	0.0264174	0.000427234	18	23
ENSG00000173947	PIFO	-1.94245	-188.067	0.0520829	0.0124956	0.0157711	2	3
ENSG00000013523	ANGEL1	-1.94215	-4.65338	0.0521195	0.0768975	1.12962e-09	15	21
ENSG00000143390	RFX5	1.94181	175.047	0.05216	0.0143047	0.00976033	1	1
ENSG00000233642	GPR158-AS1	1.94173	151.512	0.05217	0.0161411	0.00602623	1	2
ENSG00000162694	EXTL2	-1.94132	-129.112	0.05222	0.00997683	0.031099	1	1
ENSG00000180185	FAHD1	-1.94104	-1.65743	0.0522537	0.466111	3.17516e-65	107	128
ENSG00000163344	PMVK	-1.94063	-200.167	0.0523035	0.0257192	0.000510518	2	3
ENSG00000139174	PRICKLE1	-1.93967	-7.7614	0.0524194	0.0443107	4.57594e-06	23	29
ENSG00000129048	ACKR4	1.93909	176.834	0.05249	0.0108045	0.0248381	1	1
ENSG00000177409	SAMD9L	1.93808	2.15847	0.052614	0.192367	2.48996e-23	11	11
ENSG00000266910	ENSG00000266910	1.93713	2454.03	0.05273	0.010126	0.0298601	1	3
ENSG00000181722	ZBTB20	1.93688	162.066	0.05276	0.0202732	0.00206234	1	1
ENSG00000100749	VRK1	1.93658	2.67192	0.0527972	0.210529	1.21717e-25	26	26
ENSG00000233087	RAB6D	-1.93617	-3.7144	0.0528468	0.245804	2.79692e-30	8	11
ENSG00000088305	DNMT3B	-1.93523	-9.83619	0.0529627	0.0388206	1.83625e-05	7	9
ENSG00000110931	CAMKK2	-1.93485	-4.96696	0.053009	0.0242364	0.000745598	45	56
ENSG00000136379	ABHD17C	1.93435	0.006232	0.0530698	0.0241196	0.000768213	11	11
ENSG00000131899	LLGL1	-1.93369	-13.3738	0.0531508	0.0169187	0.0049191	11	12
ENSG00000070961	ATP2B1	-1.93321	-163.942	0.05321	0.0185658	0.0032064	1	1
ENSG00000065268	WDR18	1.93247	1.84116	0.053302	0.392226	3.96634e-52	6	9
ENSG00000254999	BRK1	1.93166	143.705	0.053402	0.0184852	0.00327401	2	2
ENSG00000205220	PSMB10	1.93086	253.381	0.0535	0.0104889	0.0270554	1	2
ENSG00000260495	ENSG00000260495	-1.93036	-28.7861	0.0535624	0.00833029	0.0489441	9	13
ENSG00000174915	PTDSS2	1.93019	14.1296	0.0535832	0.0121704	0.0172025	4	5
ENSG00000114200	BCHE	1.93	1.87638	0.0536067	0.146499	1.04605e-17	7	7
ENSG00000146830	GIGYF1	1.9275	10.5347	0.0539171	0.0146195	0.00898315	11	11
ENSG00000009950	MLXIPL	1.92679	3.64122	0.0540055	0.0391628	1.68391e-05	24	26
ENSG00000121579	NAA50	-1.92641	-11.2791	0.0540538	0.0194544	0.00254773	31	32
ENSG00000116809	ZBTB17	1.92539	347.332	0.0541805	0.0385786	1.95227e-05	2	3
ENSG00000140987	ZSCAN32	-1.92454	-424.085	0.0542875	0.0200971	0.00215815	2	3
ENSG00000119943	PYROXD2	-1.92396	-2.60423	0.0543601	0.295541	3.4159e-37	14	21
ENSG00000267163	NA	1.92394	18.8596	0.0543627	0.0156172	0.00691201	11	14
ENSG00000188649	CC2D2B	-1.92146	-0.295887	0.0546742	0.11974	1.48738e-14	36	41
ENSG00000170681	CAVIN4	1.92141	13.3333	0.0546802	0.0147439	0.00869376	22	27
ENSG00000157823	AP3S2	1.91969	7.42364	0.0548973	0.0717266	4.26675e-09	4	7
ENSG00000093167	LRRFIP2	-1.91963	-7.27767	0.0549049	0.0256332	0.00052184	11	12
ENSG00000133943	DGLUCY	1.91953	27.6344	0.0549178	0.0228684	0.00105835	6	7
ENSG00000159023	EPB41	-1.91888	-147.505	0.055	0.0211027	0.00166557	1	1
ENSG00000233363	ENSG00000233363	1.91837	26.7262	0.0550642	0.245767	2.829e-30	13	19
ENSG00000171055	FEZ2	1.91826	3.41089	0.0550778	0.214023	4.314e-26	35	40
ENSG00000261051	ENSG00000261051	-1.91801	-3.23938	0.0551091	0.0981167	4.56327e-12	13	13
ENSG00000113361	CDH6	-1.91769	-147.709	0.05515	0.0157679	0.00664437	1	1
ENSG00000168291	PDHB	-1.91544	-2.93824	0.0554362	0.13402	3.1688e-16	34	38
ENSG00000254923	ENSG00000254923	1.91455	14.1693	0.0555504	0.0545989	3.37232e-07	19	23
ENSG00000185869	ZNF829	1.91408	172.976	0.05561	0.0291205	0.000214706	1	1
ENSG00000112333	NR2E1	-1.9131	-209.296	0.0557357	0.0454054	3.4684e-06	2	3
ENSG00000178927	CYBC1	1.91272	3.98067	0.0557837	0.142285	3.32661e-17	29	36
ENSG00000198799	LRIG2	1.91255	10.8563	0.0558055	0.0168275	0.00503748	34	36
ENSG00000225439	BOLA3-DT	1.91175	1.30542	0.0559087	0.289082	2.86912e-36	16	19
ENSG00000125124	BBS2	1.91175	4.55502	0.0559089	0.0862108	1.01759e-10	19	24
ENSG00000175166	PSMD2	1.91156	16.5604	0.0559322	0.0536121	4.33245e-07	10	13
ENSG00000112234	FBXL4	-1.91142	-0.893958	0.0559508	0.58814	2.01784e-91	24	25
ENSG00000128242	GAL3ST1	-1.91141	-185.84	0.0559522	0.0407963	1.11373e-05	2	3
ENSG00000146223	RPL7L1	1.91078	17.8325	0.0560325	0.00881113	0.042831	4	4
ENSG00000261326	LINC01355	1.91072	148.527	0.05604	0.0121284	0.0173969	1	1
ENSG00000081052	COL4A4	-1.9107	-194.836	0.0560428	0.0138877	0.0108967	2	2
ENSG00000157240	FZD1	1.91063	12.27	0.0560521	0.00933482	0.0370738	2	2
ENSG00000140743	CDR2	1.91059	907.514	0.0560572	0.0117363	0.0193237	2	3
ENSG00000144036	EXOC6B	1.9105	11.0285	0.0560686	0.042391	7.43889e-06	12	13
ENSG00000120725	SIL1	-1.90978	-8.42631	0.0561619	0.0683832	1.00496e-08	27	35
ENSG00000146834	MEPCE	1.90929	5.14098	0.0562241	0.0938723	1.38531e-11	22	22
ENSG00000169064	ZBBX	1.90914	2.40945	0.0562445	0.214941	3.28316e-26	30	37
ENSG00000026559	KCNG1	-1.90851	-17.4286	0.0563256	0.0121723	0.0171936	16	17
ENSG00000198734	F5	-1.90741	-2.33498	0.0564681	0.133431	3.71793e-16	50	61
ENSG00000101190	TCFL5	-1.90712	-3.33481	0.0565052	0.379558	4.83097e-50	70	77
ENSG00000117425	PTCH2	1.90685	156.587	0.05654	0.0130658	0.0135493	1	1
ENSG00000102981	PARD6A	-1.906	-180.321	0.05665	0.0219464	0.00134082	1	1
ENSG00000066382	MPPED2	-1.9057	2.782	0.056689	0.00833552	0.0488729	6	7
ENSG00000117640	MTFR1L	-1.90568	-20.4955	0.0566923	0.0109676	0.0237669	6	6
ENSG00000112078	KCTD20	1.90538	22.1842	0.0567301	0.0242452	0.000743928	5	5
ENSG00000136802	LRRC8A	-1.90388	-10.1887	0.0569255	0.0263257	0.000437347	7	8
ENSG00000174871	CNIH2	-1.90323	-158.847	0.05701	0.0246493	0.000670916	1	1
ENSG00000104976	SNAPC2	-1.903	-155.773	0.05704	0.0277734	0.00030245	1	1
ENSG00000071246	VASH1	-1.90248	-12.461	0.0571084	0.0459296	3.0373e-06	12	14
ENSG00000215305	VPS16	1.90174	10.3865	0.0572054	0.0385509	1.96602e-05	6	6
ENSG00000105355	PLIN3	-1.90026	-8.63197	0.0573985	0.0893932	4.45175e-11	24	28
ENSG00000155115	GTF3C6	1.89774	169.431	0.05773	0.0357437	4.00161e-05	1	1
ENSG00000123352	SPATS2	-1.89732	-9.3162	0.0577854	0.0556549	2.57891e-07	20	22
ENSG00000132563	REEP2	1.89708	15.1922	0.0578174	0.0210963	0.00166832	7	10
ENSG00000254470	AP5B1	-1.89689	-9.07834	0.057843	0.0279053	0.000292465	4	5
ENSG00000108270	NA	-1.89677	-4.11924	0.0578585	0.088215	6.0475e-11	47	53
ENSG00000205704	SMIM45	-1.89651	-0.392307	0.0578926	0.114291	6.3678e-14	19	22
ENSG00000108296	NA	1.89648	14.5831	0.057896	0.0146058	0.00901566	15	19
ENSG00000169951	ZNF764	1.89615	171.356	0.05794	0.00931291	0.0372977	1	1
ENSG00000158806	NPM2	1.8951	21.3798	0.0580797	0.0159768	0.00629088	12	14
ENSG00000196381	ZNF781	1.89485	2.40723	0.0581117	0.267641	2.93878e-33	16	17
ENSG00000267169	ADGRL1-AS1	-1.89467	-36.7816	0.0581366	0.00830183	0.0493336	11	16
ENSG00000164465	DCBLD1	-1.89428	0.853553	0.0581877	0.161341	1.70497e-19	25	36
ENSG00000139116	KIF21A	-1.89171	-171.88	0.05853	0.0123786	0.0162713	1	1
ENSG00000132196	HSD17B7	-1.89169	-20.531	0.0585324	0.0402776	1.26997e-05	10	11
ENSG00000146352	CLVS2	-1.8915	-18.413	0.0585577	0.0107177	0.0254287	4	5
ENSG00000130529	TRPM4	1.89133	153.143	0.05858	0.0150236	0.00807715	1	1
ENSG00000160188	RSPH1	-1.8912	-13.3739	0.0585977	0.0194496	0.00255088	28	31
ENSG00000145982	FARS2	-1.89053	-6.99047	0.0586877	0.0854972	1.22445e-10	14	18
ENSG00000173890	GPR160	-1.89051	-20.13	0.0586897	0.0123624	0.0163421	21	24
ENSG00000168610	STAT3	1.88973	109.441	0.0587946	0.0123072	0.0165849	4	5
ENSG00000140025	EFCAB11	-1.88968	-10.621	0.0588006	0.00944588	0.0359604	25	25
ENSG00000144426	NBEAL1	1.88953	6.08538	0.0588206	0.079971	5.11453e-10	10	16
ENSG00000182870	GALNT9	-1.8895	-9.19688	0.0588255	0.0191427	0.00276155	5	6
ENSG00000126368	NR1D1	-1.88837	-174.969	0.0589759	0.0127452	0.0147558	2	2
ENSG00000018408	WWTR1	1.88827	189.417	0.05899	0.0527322	5.41648e-07	1	1
ENSG00000100403	ZC3H7B	1.8876	157.952	0.05908	0.0400864	1.33294e-05	1	1
ENSG00000206560	ANKRD28	-1.887	-158.652	0.05916	0.016026	0.00621039	1	1
ENSG00000087152	ATXN7L3	-1.88626	-174.523	0.05926	0.0149034	0.00833644	1	1
ENSG00000118482	PHF3	1.88581	143.444	0.05932	0.020488	0.00195127	1	1
ENSG00000175984	DENND2C	-1.88565	-10.6531	0.0593426	0.0323391	9.48298e-05	6	7
ENSG00000213121	ENSG00000213121	1.88552	162.922	0.05936	0.0105219	0.0268142	1	1
ENSG00000171202	TMEM126A	-1.88546	-9.4666	0.0593681	0.0214769	0.00151275	7	7
ENSG00000269486	ERVK9-11	1.88527	4.63883	0.0593935	0.148673	5.74855e-18	4	4
ENSG00000265590	CFAP298-TCP10L	1.88508	9.6877	0.0594192	0.0394305	1.57363e-05	13	14
ENSG00000007944	MYLIP	1.8842	19.4531	0.0595376	0.0170689	0.00473031	17	24
ENSG00000128928	IVD	-1.88305	-2.47968	0.0596942	0.392967	2.98548e-52	16	18
ENSG00000139323	POC1B	-1.88291	-1.95623	0.0597119	0.383158	1.24635e-50	14	18
ENSG00000176903	PNMA1	1.88175	171.544	0.05987	0.0364452	3.35036e-05	1	1
ENSG00000049860	HEXB	1.881	8.84189	0.0599725	0.0737091	2.56491e-09	5	8
ENSG00000158710	TAGLN2	-1.87933	-171.185	0.0602	0.0380366	2.23931e-05	1	1
ENSG00000162244	RPL29	1.87848	14.3257	0.060316	0.0235303	0.00089327	11	13
ENSG00000149308	NPAT	1.87809	11.665	0.0603692	0.0164282	0.00559067	30	32
ENSG00000149292	TTC12	1.87669	1.479	0.0605612	0.60804	2.03163e-96	25	29
ENSG00000172399	MYOZ2	-1.87667	-17.8248	0.0605631	0.0531029	4.93023e-07	11	16
ENSG00000155085	AK9	1.8756	15.6581	0.0607106	0.0268839	0.000379345	5	8
ENSG00000174938	SEZ6L2	1.8735	26.5512	0.0609987	0.00926124	0.0378313	2	3
ENSG00000147485	PXDNL	-1.87335	-8.50972	0.0610203	0.0210553	0.00168601	21	29
ENSG00000141756	FKBP10	1.87299	13.4678	0.0610695	0.0177018	0.00401218	26	35
ENSG00000150086	NA	1.87299	148.123	0.06107	0.00915893	0.0389114	1	1
ENSG00000171862	PTEN	1.87278	7.67386	0.0610988	0.0445545	4.30215e-06	58	62
ENSG00000248828	NA	-1.87264	-4.33625	0.0611185	0.19053	4.23862e-23	25	37
ENSG00000082074	FYB1	1.87236	9.24036	0.0611565	0.0194904	0.00252416	2	2
ENSG00000242593	ENSG00000242593	-1.87218	-5.93493	0.0611816	0.132248	5.12354e-16	37	43
ENSG00000005700	IBTK	1.87197	7.75706	0.0612108	0.0849875	1.39743e-10	11	15
ENSG00000197181	PIWIL2	1.87022	2.80067	0.0614534	0.250709	6.09627e-31	22	23
ENSG00000140905	GCSH	1.87015	9.78089	0.0614636	0.0124457	0.0159828	5	6
ENSG00000125845	BMP2	-1.86979	-173.762	0.0615135	0.039067	1.72526e-05	2	2
ENSG00000120318	ARAP3	1.86949	9.58386	0.0615548	0.0121688	0.01721	6	8
ENSG00000156042	CFAP70	1.86943	4.04735	0.0615626	0.11507	5.17603e-14	10	11
ENSG00000187837	H1-2	-1.8693	-2.74732	0.0615806	0.167504	3.0236e-20	18	20
ENSG00000109919	MTCH2	1.86831	161.486	0.0617188	0.0305062	0.000150988	2	2
ENSG00000112679	DUSP22	-1.86799	-26.5287	0.0617632	0.0327665	8.50897e-05	22	28
ENSG00000105738	SIPA1L3	-1.86785	-5.59025	0.0617835	0.0196928	0.00239558	19	26
ENSG00000131507	NDFIP1	-1.86762	-9.70437	0.061815	0.0270886	0.00036007	10	15
ENSG00000249348	UGDH-AS1	-1.86572	-158.193	0.06208	0.00931094	0.0373179	1	1
ENSG00000133398	MED10	-1.86493	-188.636	0.0621914	0.0332375	7.55115e-05	2	4
ENSG00000105967	TFEC	1.86397	15.9639	0.0623254	0.0213515	0.00156231	4	7
ENSG00000141542	RAB40B	-1.86366	-12.6032	0.0623696	0.0206238	0.00188416	2	2
ENSG00000176142	TMEM39A	1.86295	8.84655	0.062469	0.0408389	1.1018e-05	16	18
ENSG00000170458	CD14	-1.86294	-10.2065	0.062471	0.0530684	4.97358e-07	4	6
ENSG00000145949	MYLK4	-1.86254	-2.57405	0.0625274	0.335582	4.07451e-43	36	45
ENSG00000118260	CREB1	1.86231	-0.723143	0.06256	0.0674152	1.28739e-08	24	29
ENSG00000144040	SFXN5	-1.86189	-2.88466	0.0626189	0.124791	3.83702e-15	23	24
ENSG00000043514	TRIT1	1.86076	1.62997	0.0627777	0.448698	5.54328e-62	26	29
ENSG00000227184	NA	1.86032	6.40576	0.0628408	0.0929408	1.76664e-11	6	8
ENSG00000198520	ARMH1	-1.86004	-8.84021	0.0628793	0.0368023	3.06068e-05	7	8
ENSG00000092108	SCFD1	-1.85976	-4.13729	0.06292	0.160307	2.27636e-19	25	27
ENSG00000214087	ARL16	1.85946	2.56663	0.0629617	0.322555	3.75867e-41	30	36
ENSG00000110200	ANAPC15	1.85821	163.104	0.0631386	0.0101429	0.0297233	2	2
ENSG00000140795	MYLK3	1.85805	13.0437	0.0631623	0.0393656	1.59966e-05	13	13
ENSG00000162631	NTNG1	1.85781	3.24329	0.0631955	0.020976	0.00172079	61	82
ENSG00000223459	TCAF1P1	1.85638	241.376	0.0633996	0.015169	0.00777443	2	2
ENSG00000124772	CPNE5	-1.85624	-135.178	0.06342	0.0234306	0.000916361	6	6
ENSG00000183666	GUSBP1	-1.85577	-15.0918	0.0634869	0.0869561	8.3863e-11	20	25
ENSG00000152726	NA	-1.85546	-157.924	0.06353	0.0267836	0.000389162	1	1
ENSG00000172123	SLFN12	1.85543	3.09845	0.0635345	0.100381	2.51894e-12	16	19
ENSG00000137166	FOXP4	1.8548	14.6839	0.0636252	0.0270773	0.00036111	34	41
ENSG00000102934	PLLP	1.85469	223.21	0.0636403	0.0310502	0.000131514	2	2
ENSG00000062194	GPBP1	-1.85462	-158.345	0.06365	0.0109156	0.0241028	1	1
ENSG00000126775	ATG14	-1.85419	-23.0658	0.063712	0.0423918	7.43737e-06	5	10
ENSG00000125166	GOT2	1.85259	18.0474	0.0639407	0.0117587	0.0192079	2	2
ENSG00000248441	LETR1	-1.85258	-8.87955	0.0639431	0.0443275	4.55654e-06	16	24
ENSG00000128833	MYO5C	-1.85233	-0.778416	0.0639778	0.0346314	5.30394e-05	36	40
ENSG00000214300	SPDYE3	1.85208	9.27811	0.0640138	0.0126409	0.0151718	7	8
ENSG00000151575	TEX9	1.85193	3.29213	0.0640364	0.0283314	0.000262413	21	29
ENSG00000160285	LSS	-1.85181	-3.95517	0.0640529	0.16278	1.13977e-19	19	23
ENSG00000105877	DNAH11	1.85138	4.39332	0.0641154	0.13504	2.4017e-16	9	9
ENSG00000152104	PTPN14	1.85053	7.22613	0.0642367	0.0934169	1.56022e-11	56	62
ENSG00000153558	FBXL2	-1.84895	-18.9274	0.0644652	0.0122558	0.0168144	21	30
ENSG00000197479	PCDHB11	-1.84894	-10.4635	0.0644659	0.0775082	9.65181e-10	6	9
ENSG00000011143	MKS1	1.8487	24.8191	0.0645015	0.0091783	0.0387045	11	15
ENSG00000145743	FBXL17	1.84856	6.33854	0.0645213	0.0877891	6.75511e-11	31	38
ENSG00000197102	DYNC1H1	-1.84837	-173.137	0.0645488	0.0117148	0.0194356	2	2
ENSG00000183426	NPIPA1	-1.84836	0.870978	0.0645505	0.122543	7.01895e-15	27	35
ENSG00000153066	TXNDC11	1.84794	2.69181	0.0646109	0.282835	2.2082e-35	11	11
ENSG00000163219	ARHGAP25	1.84676	2.39822	0.0647817	0.331915	1.46901e-42	24	28
ENSG00000260693	ENSG00000260693	1.84606	7.34375	0.0648839	0.0749467	1.86607e-09	20	25
ENSG00000149782	PLCB3	-1.84455	-3.20024	0.0651027	0.0313736	0.000121149	7	8
ENSG00000235106	BRD3OS	1.84434	25.7529	0.0651333	0.0155895	0.00696226	9	11
ENSG00000115604	IL18R1	1.84391	2.30947	0.0651966	0.448436	6.19136e-62	53	62
ENSG00000159363	ATP13A2	-1.84296	-6.0477	0.0653349	0.0778106	8.92854e-10	51	60
ENSG00000120029	ARMH3	-1.84183	-168.624	0.0655	0.0169065	0.00493479	1	2
ENSG00000120162	MOB3B	-1.8418	-15.5352	0.0655049	0.0128555	0.0143289	10	10
ENSG00000128965	CHAC1	1.84142	168.875	0.06556	0.0360671	3.68695e-05	1	1
ENSG00000170989	S1PR1	1.84076	10.1964	0.0656574	0.00938649	0.0365515	25	30
ENSG00000163347	CLDN1	-1.84043	-16.2651	0.0657045	0.0270245	0.000365995	12	13
ENSG00000141026	MED9	1.84012	168.299	0.06575	0.0199469	0.00224346	1	1
ENSG00000260977	NA	-1.83999	-165.851	0.06577	0.0120258	0.0178813	1	1
ENSG00000185567	AHNAK2	-1.83985	-43.3379	0.0657906	0.00972327	0.0333291	4	7
ENSG00000104957	YJU2B	-1.83975	-194.66	0.0658055	0.043612	5.46132e-06	2	2
ENSG00000086205	FOLH1	-1.83932	-7.67562	0.0658679	0.0551332	2.94443e-07	6	11
ENSG00000169189	NSMCE1	1.83923	1.96593	0.0658817	0.0169839	0.00483632	11	11
ENSG00000198841	KTI12	1.83913	15.5408	0.0658964	0.0228677	0.00105854	8	9
ENSG00000151470	C4orf33	1.83843	1.34994	0.0659985	0.35132	1.53088e-45	43	51
ENSG00000120805	ARL1	1.83827	3.36401	0.0660222	0.061323	6.09726e-08	17	18
ENSG00000177875	CCDC184	1.83713	160.405	0.06619	0.0202414	0.00207933	1	1
ENSG00000165118	C9orf64	-1.83708	-12.1379	0.0661987	0.0205365	0.00192702	6	6
ENSG00000169641	LUZP1	1.83653	7.11159	0.0662791	0.0586923	1.19138e-07	25	29
ENSG00000172354	GNB2	-1.83598	-517.801	0.06636	0.0441331	4.78644e-06	1	1
ENSG00000133110	POSTN	1.83575	5.88069	0.0663948	0.0159162	0.0063914	35	40
ENSG00000153317	ASAP1	-1.83564	-4.52015	0.0664105	0.0533885	4.58545e-07	22	25
ENSG00000125347	IRF1	-1.83477	-157.151	0.06654	0.0168796	0.00496953	1	1
ENSG00000106246	PTCD1	-1.83459	-6.38313	0.0665664	0.0586652	1.1996e-07	4	4
ENSG00000160439	RDH13	1.83404	7.03233	0.0666478	0.0720703	3.90656e-09	23	29
ENSG00000134852	CLOCK	-1.83398	-21.2038	0.0666566	0.00915384	0.038966	14	14
ENSG00000110756	HPS5	1.83279	65.3157	0.0668336	0.00852982	0.046303	2	3
ENSG00000134198	TSPAN2	-1.83239	-9.67483	0.0668936	0.0352939	4.48453e-05	18	19
ENSG00000239306	RBM14	-1.83235	-146.658	0.0669	0.0141985	0.0100378	1	1
ENSG00000183066	WBP2NL	-1.83108	0.0331554	0.067088	0.3644	1.33277e-47	28	33
ENSG00000103018	CYB5B	-1.83074	-177.869	0.06714	0.0105923	0.0263067	1	1
ENSG00000079387	SENP1	1.83026	8.46463	0.0672115	0.0208353	0.00178425	8	8
ENSG00000068615	REEP1	1.83018	11.4074	0.0672235	0.0319453	0.000104791	17	17
ENSG00000052850	ALX4	-1.82985	-6.80638	0.0672724	0.0647967	2.51376e-08	13	13
ENSG00000239828	CCDC54-AS1	-1.82843	-271.494	0.067485	0.0287313	0.000237039	3	4
ENSG00000113578	FGF1	-1.82762	-9.05956	0.0676073	0.0469728	2.33214e-06	7	7
ENSG00000123154	WDR83	1.8263	11.1897	0.0678044	0.0102399	0.0289483	38	51
ENSG00000144559	TAMM41	1.82624	2.85687	0.0678145	0.480497	5.53374e-68	19	24
ENSG00000171724	VAT1L	1.8262	143.084	0.06782	0.00907564	0.0398145	1	1
ENSG00000040275	SPDL1	1.82573	11.1394	0.0678905	0.0292573	0.000207368	31	39
ENSG00000145349	CAMK2D	1.82468	151.984	0.06805	0.0164089	0.00561891	1	1
ENSG00000224668	IPO8P1	1.82372	239.727	0.0681947	0.0220646	0.00130072	3	3
ENSG00000155903	RASA2	-1.82342	-5.33493	0.0682402	0.0178471	0.00386351	29	30
ENSG00000166947	EPB42	-1.82333	-5.29887	0.068254	0.0381512	2.17533e-05	9	11
ENSG00000168228	ZCCHC4	1.82319	8.58227	0.0682745	0.0549578	3.07852e-07	47	49
ENSG00000141556	TBCD	1.82273	22.6347	0.0683449	0.00944521	0.035967	7	8
ENSG00000154188	ANGPT1	-1.82253	-213.976	0.0683749	0.0262684	0.000443783	7	8
ENSG00000226381	NA	-1.82251	-5.1649	0.0683773	0.0359478	3.80008e-05	32	44
ENSG00000139178	C1RL	1.82134	0.525816	0.0685546	0.127288	1.95867e-15	32	44
ENSG00000094975	SUCO	1.82118	12.0572	0.0685788	0.0307485	0.000141982	5	6
ENSG00000185252	ZNF74	-1.82101	-8.54265	0.0686054	0.00936924	0.0367249	23	30
ENSG00000198547	C20orf203	-1.8209	-7.73797	0.0686227	0.0496341	1.18829e-06	6	6
ENSG00000135148	TRAFD1	-1.82055	-16.3997	0.0686757	0.0164517	0.00555641	15	18
ENSG00000112799	LY86	-1.82042	-11.5382	0.0686953	0.0280346	0.000283001	24	29
ENSG00000165916	PSMC3	1.81999	14.2168	0.06876	0.016544	0.00542417	10	13
ENSG00000176771	NCKAP5	1.81942	11.2795	0.0688477	0.033012	7.99531e-05	21	26
ENSG00000128039	SRD5A3	-1.81862	-2.77882	0.0689692	0.191696	3.0242e-23	28	36
ENSG00000109861	CTSC	-1.81851	-8.70076	0.0689855	0.0723112	3.67242e-09	14	16
ENSG00000138050	THUMPD2	1.81849	180.79	0.06899	0.0169923	0.00482563	1	1
ENSG00000182534	MXRA7	1.81844	1.91791	0.0689971	0.337379	2.16851e-43	16	17
ENSG00000213699	SLC35F6	1.81821	150.594	0.0690323	0.0146906	0.00881647	2	2
ENSG00000150867	PIP4K2A	-1.81818	-3.70301	0.0690364	0.182857	3.85933e-22	30	33
ENSG00000155506	LARP1	1.81816	179.265	0.06904	0.0234145	0.00092015	1	1
ENSG00000100522	GNPNAT1	1.81711	161.85	0.0692	0.0269265	0.000375248	1	1
ENSG00000071564	TCF3	1.81709	129.244	0.0692041	0.0112169	0.0222208	3	3
ENSG00000137752	CASP1	1.81663	184.911	0.0692744	0.0160902	0.00610696	2	2
ENSG00000233115	FAM90A11P	1.81645	14.7709	0.0693016	0.0359782	3.77093e-05	8	16
ENSG00000184232	OAF	1.81628	2.63104	0.0693269	0.171904	8.73323e-21	37	46
ENSG00000164251	F2RL1	1.81625	2.56363	0.0693326	0.271335	9.03086e-34	39	48
ENSG00000196110	ZNF699	1.81592	203.609	0.0693832	0.00835018	0.0486739	3	3
ENSG00000096063	SRPK1	1.81547	7.46747	0.0694514	0.0337241	6.67501e-05	12	14
ENSG00000101161	PRPF6	1.81503	21.1565	0.06952	0.00965513	0.0339563	1	1
ENSG00000116062	MSH6	1.81445	-1.79881	0.0696088	0.0118972	0.018508	22	25
ENSG00000205060	SLC35B4	1.81418	188.691	0.06965	0.0322328	9.74208e-05	1	1
ENSG00000084093	REST	1.81361	167.996	0.0697384	0.0314931	0.00011753	4	5
ENSG00000140632	GLYR1	1.81258	3.74203	0.0698965	0.0440916	4.83697e-06	59	69
ENSG00000269858	EGLN2	1.81234	14.2871	0.069933	0.0101923	0.0293259	7	9
ENSG00000108604	SMARCD2	-1.81181	-9.16383	0.0700162	0.0310512	0.00013148	9	9
ENSG00000121749	TBC1D15	1.81152	167.356	0.07006	0.0206432	0.00187477	1	1
ENSG00000259690	ENSG00000259690	-1.81147	-153.047	0.0700681	0.0205175	0.00193648	3	4
ENSG00000168275	COA6	-1.8113	-3.49058	0.0700951	0.172539	7.29515e-21	43	47
ENSG00000124635	H2BC11	-1.81071	7.51095	0.070186	0.00852812	0.0463249	11	14
ENSG00000079805	DNM2	1.81028	13.4592	0.0702523	0.0147494	0.00868108	9	9
ENSG00000198189	HSD17B11	-1.81019	-7.85882	0.0702668	0.224976	1.62308e-27	28	41
ENSG00000125863	MKKS	1.80917	4.36893	0.0704253	0.154359	1.19216e-18	34	36
ENSG00000134086	VHL	1.80867	7.92644	0.0705021	0.0456563	3.25492e-06	14	14
ENSG00000103145	HCFC1R1	-1.80856	-168.01	0.07052	0.0361915	3.57264e-05	1	1
ENSG00000143622	RIT1	1.80789	11.9241	0.070624	0.0142641	0.00986534	17	19
ENSG00000170921	TANC2	1.80785	162.737	0.07063	0.0184548	0.00329996	1	1
ENSG00000084754	HADHA	1.8074	171.833	0.0707	0.0526991	5.46218e-07	1	2
ENSG00000108963	DPH1	1.80701	156.095	0.07076	0.0172511	0.00451119	1	1
ENSG00000157927	RADIL	-1.80498	-14.9263	0.0710774	0.0188816	0.00295456	5	5
ENSG00000179698	WDR97	-1.80494	-2.92759	0.0710845	0.310274	2.47419e-39	33	35
ENSG00000100504	PYGL	-1.80489	-20.9855	0.0710915	0.0239721	0.000797749	6	6
ENSG00000135956	TMEM127	1.80446	180.221	0.07116	0.0200754	0.00217026	1	2
ENSG00000057593	F7	1.80367	14.0677	0.0712829	0.067882	1.14248e-08	42	55
ENSG00000087302	RTRAF	-1.8035	-152.051	0.07131	0.0261264	0.000460139	1	1
ENSG00000162620	LRRIQ3	1.80345	1.55613	0.0713183	0.503278	1.64053e-72	44	47
ENSG00000106571	GLI3	1.80324	169.245	0.07135	0.0301177	0.000166646	1	1
ENSG00000100280	AP1B1	1.80301	9.77836	0.0713862	0.0232548	0.00095857	15	16
ENSG00000148300	REXO4	-1.80272	-3.10044	0.0714328	0.24696	1.95514e-30	23	24
ENSG00000114757	PEX5L	-1.80234	-143.634	0.0714922	0.0113349	0.0215257	4	4
ENSG00000185963	BICD2	-1.8011	-12.3914	0.0716876	0.0242393	0.00074506	8	9
ENSG00000143748	NVL	1.80109	194.595	0.0716882	0.0221296	0.0012792	2	2
ENSG00000103037	SETD6	1.801	9.54013	0.071703	0.0350319	4.79219e-05	16	17
ENSG00000131848	ZSCAN5A	-1.80097	-9.11675	0.0717079	0.04538	3.49074e-06	57	68
ENSG00000197702	PARVA	1.80021	6.13532	0.0718274	0.103772	1.03229e-12	17	21
ENSG00000119977	TCTN3	-1.80004	-15.5109	0.0718539	0.0117706	0.0191471	8	12
ENSG00000135587	SMPD2	-1.79981	-2.97894	0.0718899	0.0671958	1.36169e-08	36	44
ENSG00000141376	BCAS3	-1.79951	-5.15528	0.0719388	0.0799701	5.11565e-10	13	14
ENSG00000139620	KANSL2	-1.79861	-201.563	0.07208	0.0447356	4.10938e-06	1	2
ENSG00000170234	PWWP2A	-1.79844	-239.559	0.0721077	0.0252471	0.000575901	2	2
ENSG00000163808	KIF15	1.7975	3.12723	0.0722565	0.0756568	1.5546e-09	12	14
ENSG00000197147	LRRC8B	-1.79709	-4.23573	0.0723218	0.107306	4.06162e-13	35	35
ENSG00000241345	ENSG00000241345	-1.79652	-10.8831	0.0724115	0.0186442	0.00314193	19	24
ENSG00000134152	KATNBL1	1.79595	15.6689	0.072503	0.0245458	0.000688893	9	10
ENSG00000213024	NUP62	-1.79483	-13.401	0.0726802	0.0203189	0.0020382	23	31
ENSG00000149150	SLC43A1	1.79461	12.6524	0.0727154	0.0254439	0.000547677	12	13
ENSG00000103510	KAT8	-1.79461	-4.39662	0.0727155	0.120788	1.12358e-14	7	9
ENSG00000153291	SLC25A27	-1.7946	-1.03533	0.0727168	0.423597	1.74628e-57	27	30
ENSG00000230006	ANKRD36BP2	1.79381	12.8358	0.0728437	0.0286457	0.00024225	7	7
ENSG00000177105	RHOG	1.79293	173.358	0.072984	0.010139	0.0297543	3	3
ENSG00000247077	PGAM5	-1.79183	-165.811	0.07316	0.0437793	5.23486e-06	1	1
ENSG00000160208	RRP1B	1.79179	3.84913	0.0731671	0.0911597	2.81075e-11	32	43
ENSG00000070785	EIF2B3	-1.79172	-3.22667	0.0731785	0.172476	7.42629e-21	16	17
ENSG00000106263	EIF3B	1.79131	10.279	0.073244	0.0570677	1.80095e-07	27	31
ENSG00000215788	TNFRSF25	1.79068	5.90938	0.0733448	0.0493218	1.28618e-06	37	41
ENSG00000169813	HNRNPF	1.7904	122.056	0.0733892	0.0204203	0.00198562	2	2
ENSG00000143443	C1orf56	1.79021	16.4754	0.0734201	0.0109294	0.0240133	15	25
ENSG00000134910	STT3A	1.78921	3.02254	0.0735811	0.0272608	0.000344618	79	92
ENSG00000141141	NA	1.78833	12.5955	0.0737226	0.0224595	0.00117537	10	11
ENSG00000254004	ZNF260	-1.7874	-18.953	0.0738724	0.0619333	5.21894e-08	5	6
ENSG00000001630	CYP51A1	1.78732	7.4698	0.0738855	0.0488864	1.43622e-06	36	44
ENSG00000204323	SMIM5	1.78711	226.513	0.07392	0.017122	0.00466535	2	2
ENSG00000165338	HECTD2	-1.78643	-164.348	0.07403	0.0145665	0.00910955	1	1
ENSG00000183354	KIAA2026	-1.7862	-8.59273	0.0740676	0.0367156	3.12863e-05	61	70
ENSG00000112578	BYSL	1.78606	147.743	0.07409	0.0198634	0.00229233	1	1
ENSG00000124217	MOCS3	-1.78587	-160.906	0.07412	0.0167184	0.0051828	1	1
ENSG00000177200	CHD9	-1.78502	-6.77772	0.0742577	0.0312129	0.000126193	57	59
ENSG00000163377	TAFA4	1.78482	169.091	0.0742901	0.0197702	0.00234817	2	2
ENSG00000164938	TP53INP1	1.7837	13.2677	0.0744721	0.0139785	0.0106383	2	2
ENSG00000160271	RALGDS	1.78362	8.19923	0.0744859	0.0596169	9.41555e-08	30	34
ENSG00000116198	CEP104	-1.7828	-3.42877	0.0746196	0.132626	4.62561e-16	29	34
ENSG00000169499	PLEKHA2	-1.78279	-0.54158	0.0746197	0.194798	1.22971e-23	43	53
ENSG00000124275	MTRR	1.78211	3.75125	0.0747306	0.174843	3.79564e-21	8	9
ENSG00000166510	CCDC68	-1.78159	-3.5127	0.0748161	0.0989203	3.69618e-12	33	39
ENSG00000173548	SNX33	1.78156	166.71	0.0748214	0.00941637	0.0362528	2	2
ENSG00000232931	LINC00342	1.78087	19.7511	0.0749329	0.015455	0.00721226	5	8
ENSG00000103089	FA2H	1.77943	1021.61	0.07517	0.0138719	0.0109423	1	2
ENSG00000249459	ZNF286B	-1.77875	-499.624	0.07528	0.0147225	0.00874283	1	2
ENSG00000224831	TMEM183BP	1.77808	754.769	0.07539	0.0322451	9.71169e-05	1	2
ENSG00000165678	GHITM	1.77789	1.60924	0.0754223	0.0963325	7.28168e-12	30	39
ENSG00000106028	SSBP1	-1.77761	-157.034	0.0754682	0.0131766	0.0131563	3	4
ENSG00000257279	ENSG00000257279	1.77717	171.3	0.07554	0.0221791	0.00126306	1	1
ENSG00000161682	FAM171A2	-1.77675	-879.546	0.07561	0.0310231	0.000132421	1	2
ENSG00000129534	MIS18BP1	1.77649	14.2346	0.075653	0.0500324	1.07418e-06	23	35
ENSG00000187815	ZFP69	1.77644	1.15636	0.0756604	0.262163	1.67283e-32	68	74
ENSG00000198523	PLN	-1.77607	-199.386	0.075721	0.0123825	0.0162545	2	4
ENSG00000170634	ACYP2	1.77599	172.335	0.0757338	0.011683	0.0196026	2	2
ENSG00000139329	LUM	-1.77597	-16.5974	0.0757374	0.0168744	0.00497626	33	51
ENSG00000213406	ANXA2P1	1.77575	174.911	0.0757746	0.0505346	9.45771e-07	2	2
ENSG00000140398	NEIL1	-1.77552	-6.29949	0.0758116	0.049206	1.32449e-06	27	31
ENSG00000075043	KCNQ2	1.77493	159.69	0.07591	0.0105142	0.02687	1	1
ENSG00000197713	RPE	-1.77402	-252.985	0.07606	0.0264694	0.00042161	1	2
ENSG00000089169	RPH3A	-1.7739	-228.046	0.07608	0.0255932	0.0005272	1	2
ENSG00000120784	ZFP30	1.77366	179.313	0.07612	0.0206386	0.00187697	1	1
ENSG00000122557	HERPUD2	1.77291	3.3951	0.0762439	0.0985432	4.08047e-12	29	31
ENSG00000071539	TRIP13	1.77227	12.7225	0.0763493	0.0335187	7.03172e-05	15	19
ENSG00000108924	HLF	1.77147	156.426	0.0764819	0.028955	0.000223927	2	2
ENSG00000126785	RHOJ	-1.77136	-7.03438	0.0765008	0.0341291	6.0238e-05	7	8
ENSG00000148840	PPRC1	1.77124	12.9164	0.0765215	0.0173233	0.00442725	29	39
ENSG00000124523	SIRT5	-1.77093	-3.78571	0.0765723	0.136469	1.62821e-16	36	48
ENSG00000144231	POLR2D	1.77089	5.4177	0.0765793	0.0709461	5.21227e-09	19	20
ENSG00000183775	KCTD16	1.77034	161.294	0.07667	0.0241769	0.000757038	1	1
ENSG00000145242	EPHA5	-1.77008	-6.76018	0.0767138	0.0222604	0.00123697	28	32
ENSG00000177000	MTHFR	-1.76972	-4.74511	0.0767735	0.0526229	5.56873e-07	23	27
ENSG00000214078	CPNE1	1.76881	2.78433	0.0769249	0.283441	1.81272e-35	20	22
ENSG00000177606	JUN	-1.76785	-158.991	0.0770864	0.0167018	0.00520541	3	3
ENSG00000114354	TFG	-1.76773	-145.653	0.0771055	0.0262797	0.000442506	3	4
ENSG00000154237	LRRK1	1.76761	204.375	0.0771268	0.024885	0.000631704	4	4
ENSG00000022277	RTF2	1.76682	16.9484	0.0772579	0.0259229	0.000484663	15	15
ENSG00000213976	ENSG00000213976	-1.7662	-5.60603	0.0773627	0.103233	1.18976e-12	8	10
ENSG00000169031	COL4A3	1.76615	150.324	0.07737	0.0193054	0.00264779	1	1
ENSG00000165832	TRUB1	1.76575	11.4422	0.0774385	0.00863918	0.0449194	15	18
ENSG00000139899	CBLN3	-1.7656	-2.57901	0.0774632	0.398677	3.31007e-53	17	19
ENSG00000256616	ADGRA3P1	1.76514	294.046	0.07754	0.0653728	2.16986e-08	1	5
ENSG00000165757	JCAD	1.76502	185.485	0.0775604	0.0216756	0.00143744	4	4
ENSG00000196391	ZNF774	1.76498	6.22147	0.0775664	0.126149	2.66213e-15	35	45
ENSG00000168040	FADD	1.7633	8.51386	0.0778492	0.0319649	0.000104271	11	12
ENSG00000173811	CCDC13-AS1	1.76292	7.22066	0.0779145	0.0542568	3.67834e-07	4	4
ENSG00000169689	CENPX	-1.76251	-2.42517	0.0779837	0.380302	3.6525e-50	9	11
ENSG00000170485	NPAS2	1.76247	23.3165	0.0779894	0.01644	0.00557353	8	10
ENSG00000203727	SAMD5	-1.76226	-7.98157	0.0780247	0.112957	9.07981e-14	48	54
ENSG00000163875	MEAF6	1.76217	12.9222	0.0780414	0.036808	3.05631e-05	9	12
ENSG00000160404	TOR2A	-1.76174	-2.59932	0.0781139	0.018889	0.00294893	11	11
ENSG00000166847	DCTN5	1.76123	165.72	0.0782	0.0164469	0.00556344	1	1
ENSG00000236943	NA	-1.76014	-38.8717	0.0783841	0.0561906	2.25071e-07	2	8
ENSG00000198673	TAFA2	1.75951	11.2714	0.0784901	0.0508924	8.63756e-07	32	35
ENSG00000084674	APOB	1.75898	4.56298	0.0785806	0.0786795	7.13677e-10	18	20
ENSG00000175820	CCDC168	-1.75834	-5.74641	0.0786891	0.0690113	8.55696e-09	11	14
ENSG00000251682	ENSG00000251682	1.75787	179.317	0.07877	0.0212963	0.00158466	1	1
ENSG00000161016	RPL8	-1.75767	-6.88312	0.0788032	0.0425978	7.05951e-06	6	8
ENSG00000215302	WHAMMP4	1.75646	15.0663	0.0790102	0.113052	8.85408e-14	13	18
ENSG00000173214	MFSD4B	-1.75605	-143.508	0.0790799	0.0170526	0.00475044	2	2
ENSG00000154822	PLCL2	1.75586	12.9853	0.0791116	0.0302099	0.000162787	7	10
ENSG00000163956	LRPAP1	-1.75571	-2.21225	0.0791376	0.473005	1.54545e-66	12	16
ENSG00000169251	NMD3	-1.75466	-2.65521	0.0793171	0.151135	2.91207e-18	47	48
ENSG00000153563	CD8A	1.75453	11.2118	0.0793397	0.0290253	0.000219961	26	28
ENSG00000141258	SGSM2	1.75411	6.24929	0.079411	0.0876658	6.97483e-11	9	12
ENSG00000111816	FRK	1.75392	3.82822	0.0794448	0.0294476	0.000197574	5	5
ENSG00000143603	KCNN3	1.75381	2.25279	0.0794636	0.0856321	1.18236e-10	11	13
ENSG00000170802	FOXN2	-1.75217	-2.80737	0.0797448	0.0180918	0.00362576	55	64
ENSG00000138780	GSTCD	-1.75188	-21.5316	0.0797948	0.0136407	0.0116327	33	35
ENSG00000196072	BLOC1S2	1.75114	9.96966	0.0799225	0.0260914	0.00046427	37	40
ENSG00000115041	KCNIP3	1.75111	10.439	0.0799268	0.0229314	0.00104139	12	13
ENSG00000142937	RPS8	1.7509	28.2298	0.0799629	0.0082838	0.0495821	11	11
ENSG00000127152	BCL11B	-1.75045	-149.182	0.08004	0.0140985	0.0103063	1	1
ENSG00000264538	SUZ12P1	1.75043	5.64331	0.0800444	0.0847971	1.46808e-10	27	32
ENSG00000107968	MAP3K8	-1.75023	-143.245	0.0800784	0.0161336	0.00603802	2	2
ENSG00000118849	RARRES1	-1.74995	-3.33566	0.0801266	0.22517	1.5309e-27	10	15
ENSG00000259498	TPM1-AS	1.7497	159.456	0.08017	0.0170852	0.0047103	1	1
ENSG00000171443	ZNF524	1.74911	83.7128	0.0802723	0.0179091	0.00380181	2	3
ENSG00000138138	ATAD1	1.74892	7.36034	0.0803044	0.064437	2.75553e-08	36	37
ENSG00000095587	TLL2	-1.7487	-6.85907	0.0803428	0.0616173	5.6567e-08	15	17
ENSG00000084731	KIF3C	-1.74854	-71.0718	0.08037	0.00833326	0.0489037	1	1
ENSG00000120685	PROSER1	1.74817	9.22608	0.080435	0.0159846	0.00627797	9	10
ENSG00000140464	PML	1.74802	164.547	0.08046	0.00900746	0.0405702	1	1
ENSG00000267506	ENSG00000267506	1.74798	5.08262	0.0804671	0.282615	2.37195e-35	40	43
ENSG00000013561	RNF14	1.74735	13.5059	0.0805774	0.0204069	0.00199245	8	8
ENSG00000122548	KIAA0087	1.74685	1.43506	0.0806631	0.526801	2.0749e-77	35	43
ENSG00000205464	ATP6AP1L	1.7468	1.41011	0.0806726	0.520635	4.20568e-76	77	90
ENSG00000186496	ZNF396	1.74615	8.32023	0.0807849	0.0560011	2.36176e-07	13	18
ENSG00000100934	SEC23A	1.74578	147.359	0.0808487	0.00994106	0.031404	3	3
ENSG00000064601	CTSA	1.74564	237.683	0.0808727	0.0204027	0.00199464	2	2
ENSG00000094804	CDC6	1.74491	188.594	0.081	0.0274807	0.000325849	1	1
ENSG00000162981	LRATD1	-1.74356	-348.921	0.0812365	0.0599094	8.74002e-08	3	4
ENSG00000142556	ZNF614	-1.74302	-282.496	0.08133	0.0320482	0.000102091	1	2
ENSG00000147883	CDKN2B	1.74285	7.33696	0.0813598	0.052605	5.5941e-07	53	66
ENSG00000107338	SHB	-1.74275	-6.08252	0.081378	0.0545256	3.43568e-07	43	53
ENSG00000105357	MYH14	1.74271	18.0148	0.081385	0.0104064	0.0276679	25	29
ENSG00000136840	ST6GALNAC4	1.74165	185.352	0.0815695	0.0289782	0.000222612	2	2
ENSG00000151651	ADAM8	1.74113	181.845	0.08166	0.0372112	2.75974e-05	1	1
ENSG00000124299	PEPD	-1.74098	-2.73219	0.0816864	0.379659	4.65068e-50	22	23
ENSG00000187790	FANCM	-1.73998	-4.62393	0.0818629	0.111573	1.3116e-13	17	19
ENSG00000163644	PPM1K	1.73979	6.39988	0.0818959	0.0789375	6.67742e-10	8	9
ENSG00000086504	MRPL28	1.73915	3.88338	0.0820086	0.141872	3.72478e-17	38	48
ENSG00000171160	MORN4	1.73877	4.54148	0.0820746	0.217956	1.33522e-26	56	66
ENSG00000100412	ACO2	1.73869	187.37	0.08209	0.0419538	8.30925e-06	1	1
ENSG00000140057	AK7	1.73852	18.1939	0.0821198	0.0343438	5.70489e-05	10	10
ENSG00000260412	ENSG00000260412	-1.73796	-2.98061	0.0822173	0.0520838	6.38492e-07	20	25
ENSG00000065427	KARS1	1.73724	184.664	0.0823452	0.0366032	3.21899e-05	2	3
ENSG00000100578	KIAA0586	1.73675	12.8784	0.0824315	0.0491816	1.33269e-06	5	6
ENSG00000130844	ZNF331	-1.73665	-16.9496	0.0824485	0.0113006	0.021725	2	3
ENSG00000134308	YWHAQ	-1.73663	0.262009	0.0824522	0.0246322	0.000673852	26	28
ENSG00000156876	SASS6	-1.73649	-5.79511	0.0824771	0.0896766	4.13534e-11	37	40
ENSG00000077348	EXOSC5	1.73647	146.898	0.08248	0.0100851	0.030195	1	1
ENSG00000262223	LINC03048	-1.73552	-3.75666	0.0826483	0.170734	1.21591e-20	4	5
ENSG00000108064	TFAM	1.73455	3.29961	0.0828211	0.223397	2.61153e-27	8	8
ENSG00000107625	DDX50	-1.73421	-144.536	0.08288	0.00859679	0.0454505	1	1
ENSG00000147592	LACTB2	-1.73393	-4.76706	0.08293	0.10949	2.27853e-13	35	36
ENSG00000130382	MLLT1	1.73372	185.972	0.082968	0.0168559	0.00500032	2	3
ENSG00000135686	KLHL36	1.73322	13.7191	0.0830563	0.0356934	4.05292e-05	2	2
ENSG00000213904	LIPE-AS1	-1.73283	-215.604	0.0831264	0.0251272	0.0005938	2	3
ENSG00000253837	LOXL2-AS1	1.73247	143.314	0.08319	0.0209846	0.001717	1	1
ENSG00000254995	STX16-NPEPL1	-1.73239	-1.08729	0.0832034	0.106924	4.49282e-13	43	47
ENSG00000141034	GID4	1.7318	148.287	0.08331	0.0466238	2.54764e-06	1	1
ENSG00000164512	ANKRD55	-1.73157	-285.173	0.0833496	0.0217597	0.00140668	2	2
ENSG00000185024	BRF1	-1.73035	-201.348	0.0835678	0.029316	0.000204295	2	3
ENSG00000104327	CALB1	-1.72983	-196.439	0.0836601	0.034139	6.00878e-05	8	8
ENSG00000165807	PPP1R36	-1.72958	-13.5206	0.0837058	0.0110234	0.0234111	12	13
ENSG00000146070	PLA2G7	-1.72906	-2.24765	0.083798	0.314539	5.82981e-40	5	5
ENSG00000198363	ASPH	1.72867	7.5143	0.0838687	0.0624879	4.5308e-08	32	33
[truncated: 8,361 more rows]

## Sheet: Supplementary Data 2
Supplementary Data 2. Summary of IPA® findings for functional annotations of 56 M10-GeRS genes within Module 10.
IPA Top Networks
Network ID	Associated Network Functions	IPA Score	Implicated Molecules (bold=part of genes in module 10)
1	Cancer, Hematological Disease, Organismal Injury and Abnormalities	75	26S proteasome,Akt,ATP6V1H,ATPase,COA1,COPS6,COPS7A,CSTPP1,DHPS,DNA damage response,EIPR1,ERCC3,FEN1,GOT2,GPX4,Histone h3, Hsp70, LRPAP1,LRPPRC,MCAT,MRPS7,NDN,NEDD8-STONs:TOR1 hexamer:COP9,PARP2,PNMA8A,proteasome,PSMB5,PSMD2,PTPRR,RNF8, RUVBL2, SERPINF1,THOC5,TOR1A,TUBA4A
2	Cell Morphology, Hematological System Development and Function, Inflammatory Response	35	ACOT8,ADCK5,APP,B4GAT1,CLTA,COX6B1,COX7B2,COX7C,COX8A,Cristae formation,CUEDC2,Cytochrome c oxidase core,Cytochrome c oxidase:CO, FIBP,Focal adhesion kinase,GPR3,IDH3B,IMMT,KEAP1,LYRM4,Mff,MIB,MICOS10, MOB3A,NDUFA4,Perm1,SAMM50,SDHA,SLAMF8,SNX17, STOML2, TMEM177,TSPAN,TSPAN5,VPS33B
3	Cardiac Arrythmia, Cardiovascular Disease, Organismal Injury and Abnormalities	16	ACKR3,ADRA2A,advanced glycation end-products,ATP1A2,BLVRA,Bvr,CDH1,DHRS7B,ERK1/2,folic acid,GMFB,GPR39,Gsk3,Histone h4,Insulin,KCTD20, LCMT1,MAST2,ME3,NANS,NAPA,NFkB (complex),PITPNB, PITX2,Pkc(s),Ppar,PPP2CA,protectin D1,PTPN5,SAE1,SLC6A3,STXBP6,Ve Cadherin,Vegf,Wnt
4	Developmental Disorder, Endocrine System Disorders, RNA Post-Transcriptional Modification	11	EFTUD2,FAM50A,GARS1,GPBP1,IBTK,JCHAIN,LSM1,LSM11,LSM12,LSM3,LSM5,LSM6,LSM7,MRPL57,MXD1,PARP10,PEF1,PRPF38A,PRPF38B,RNPC3, RNU4-1,SARS1,snRNP,snRNP-IgG IC,SNRNP25,SNRNP35,SNRNP48,SNRPN,STRAP,SWAP70, TLR7,tRNA Charging,TXNL4A,ZCRB1,ZMAT5

## Sheet: Supplementary Data 3
Supplementary Data 3. Relationships among genes within the top gene network of module 10, as identified by IPA.
Gene Name	Direct Relationship	Indirect Relationship	Total Relationship
LRPPRC	6	0	6
RUVBL2	5	1	6
COPS6	4	2	6
PSMB5	4	1	5
PSMD2	4	0	4
TUBA4A	4	0	4
NDN	3	1	4
PTPRR	3	1	4
ERCC3	3	0	3
MRPS7	3	0	3
COPS7A	2	0	2
EIPR1	2	0	2
FEN1	2	0	2
PARP2	2	0	2
RNF8	2	0	2
THOC5	2	0	2
TOR1A	2	0	2
COA1	1	0	1
CSTPP1	1	0	1
DHPS	1	0	1
GOT2	1	1	2
MCAT	1	0	1
PNMA8A	1	0	1
SERPINF1	1	2	3
ATP6V1H	0	1	1
GPX4	0	1	1
LRPAP1	0	1	1

## Sheet: Supplementary Data 4
Supplementary Data 4. Summary of IPA® findings for functional annotations of 119 M9-GeRS genes within Module 9 from WGCNA based on gene expression of frontal cortex and temporal cortex brain tissue
IPA Top Networks
Network ID	Associated Network Functions	IPA Score	Implicated Molecules (bold=part of genes in module 9)
1	Cellular Response to Therapeutics, Cancer, Gastrointestinal Disease	46	19S proteasome,20S/PA700 proteasome,26S proteasome Reactome,26S proteasome Reactome b,AAGAB,ADRM1:26S proteasome,ADRM1:26S proteasome:UCHL5, ADRM1:26Sproteasome:USP14,AKT,ANXA6,APBA2,APLP2,COPS3,COPS7A,DEPDC5,ECPAS,GARS1,KLC,KLC1,NEDD8,UBD:NUB1:26S proteasome,NRDC,PLCL2, PSMA1, PSMB5,PSMD,PSMD13,PSMD2,PSMD4,PSMD7,Secretase gamma,Secretory granule lumen proteins,USF1,VPS11,proteasome
2	Developmental Disorder, Hereditary Disorder, Metabolic Disease	43	ATAD1,ATP synthase,ATP5PD,ATPase,BMS1,CHMP4B,CHMP7,ERK1/2,ESCRT Regulator,FOXRED1,HSP70,LEM2D:ESCRT III:IST1:CC2D1B:SPAST:VPS4A,LRPPRC, MFN2,MTCH1,Mitochondrial ETC 1,Mitochondrial respiratory transport chain,NDUFS2,NIPSNAP1,NUDCD3,Oxphos,PEBP1,PNMA8A,SAE1,SDHA,SDHB,VDAC, VDAC1,VPS4A,Virion Budding,ZFYVE27,cytochrome C,cytochrome-c oxidase,succinate dehydrogenase,ubiquitin
3	RNA Post-Transcriptional Modification, Cancer, Gastrointestinal Disease	43	ARFGEF2,BCR (complex),CMTR1,COA7,CREB,DDX41,DNA damage response,ELP3,ERCC3,FSH,GNL3,GSK3,HAGH,HK1,IFNbeta,IgM,LDL,MDN1,METTL3,MICU1, MSH2, NFkB (complex),PI3K (family),PMS2,PRKAR1A,RBM5,RNA polymerase II,RNR,SF3A3,SLC4A1AP,TGF beta,THYN1,TRIM3,histone H3,histone H4
4	Cellular Movement, Cancer, Gastrointestinal Disease	38	26S proteasome,AMPK,B4GAT1,CD3 (complex),CHGB,CK2,DDX24,DHPS,EBNA1BP2,EIF2B3,Ficolin-rich granule lumen proteins,HSP90 (family),IARS1,IgE,Immunoglobulin, JNK, KIAA0319L,MEK,MTORC1,NME1,PDAP1,PDHB,PGAM1,PI3K (complex),PKM,PSEN2,RNF187,RNF8,SLC25A3,TCR (complex),VDAC3,VEGF,caspase,insulin,p70 S6k

## Sheet: Supplementary Data 5
Supplementary Data 5. Relationships among genes within the top gene network of module 9 from WGCNA based on gene expression of frontal cortex and temporal cortex brain tissue, as identified by IPA.
Gene Name	Direct Relationship	Indirect Relationship	Total Relationship
PSMD13	18	0	18
PSMD2	18	0	18
PSMD3	18	0	18
PSMD7	18	0	18
PSMD4	17	0	17
PSMB5	15	2	17
PSMA1	14	0	14
ECPAS	10	0	10
APBA2	2	0	2
APLP2	2	2	4
COPS3	2	0	2
KLC1	2	0	2
AAGAB	1	0	1
ANXA6	1	2	3
COPS7A	1	0	1
GARS1	1	1	2
NRDC	1	0	1
USF1	1	1	2
VPS11	1	0	1
DEPDC5	0	1	1
PLCL2	0	1	1
